# Supplementary material for: Blue light enhanced Heck arylation at room temperature applied to allenes
Source: Royal Society of Chemistry journal article supplement (doi:10.1039/d1qo01631h), 2021-12-02
Supplement: d1qo01631h1.pdf [file d1qo01631h1.pdf]

## Computational Data

# Blue Light Enhanced Heck Arylation at Room Temperature Applied to Allenes

Polyssena Renzi,<sup>[a]</sup> Emanuele Azzi,<sup>[a]</sup> Enrico Bessone,<sup>[a]</sup> Giovanni Ghigo,<sup>\*[a]</sup> Stefano Parisotto,<sup>[a]</sup>  
Francesco Pellegrino,<sup>[a]</sup> Annamaria Deagostino<sup>\*[a]</sup>

### INDEX

|                                                                                                                                             |    |
|---------------------------------------------------------------------------------------------------------------------------------------------|----|
| Computational method.                                                                                                                       | 2  |
| <b>Table R.</b> Calculated absolute and relative energies for the palladium(II) reduction.                                                  | 3  |
| <b>Scheme 1.</b> The oxidative addition step to (DMF) <sub>3</sub> Pd <sup>0</sup> (PPh <sub>3</sub> ), <b>I</b> (Figure 4 in the article). | 4  |
| <b>Table 1.</b> Calculated absolute and relative energies for the oxidative addition step to <b>I</b> .                                     | 4  |
| <b>Scheme 2.</b> The oxidative addition step to (DMF) <sub>2</sub> Pd <sup>0</sup> (PPh <sub>3</sub> ) <sub>2</sub> , <b>I'</b> .           | 5  |
| <b>Table 2.</b> Calculated absolute and relative energies for the oxidative addition step to <b>I'</b> .                                    | 5  |
| <b>Figure 1.</b> Energy profiles following the formation of intermediate <b>III</b> .                                                       | 6  |
| <b>Scheme 3.</b> The favoured pathway (black profiles in Figure 5 in the article).                                                          | 7  |
| <b>Table 3.</b> Calculated absolute and relative energies for the favoured pathway.                                                         | 8  |
| <b>Scheme 4.</b> The alternative generation of intermediate <b>E</b> (violet and first part of blue profiles).                              | 9  |
| <b>Table 4.</b> Calculated absolute and relative energies for the alternative generation of <b>E</b> .                                      | 10 |
| <b>Scheme 5.</b> The alternative pathways (blue and green profiles).                                                                        | 11 |
| <b>Table 5.</b> Calculated absolute and relative energies for the alternative pathways.                                                     | 12 |
| <b>Scheme 6.</b> The excited states pathways (Figure 6 in the article).                                                                     | 13 |
| <b>Table 6.</b> Calculated absolute and relative energies for the excited states pathways.                                                  | 14 |
| <b>Pictures and Cartesian coordinates</b> of optimized structures M06/def2-TZVP.                                                            | 15 |
| <b>Pictures and Cartesian coordinates</b> of excited state optimized structures M06/def2-SVP.                                               | 69 |

## Computational method.

The structures of the reactants, intermediates and transition states have been optimized by using the density functional method (DFT)<sup>1</sup> with the functional M0<sup>2,3</sup> and the basis sets def2-SVP.<sup>4</sup> The electronic energy values were refined by re-optimization with the basis set def2-TZVP.<sup>5</sup> The nature of the critical points was characterized by using vibrational analysis<sup>6</sup> which also furnished the Zero Point Energies (ZPE) and entropies for the calculations of the Free Energies. These have been converted from the gas phase to the 1 M standard state at 1 atm and 298.15 K.<sup>7</sup> The solvent effects (*N,N*-dimethylformamide, DMF) were introduced in all calculations using the universal solvation model (SMD) by Truhlar *et al.*<sup>8</sup> The singlet excited states have been optimized with the Time-Dependent DFT.<sup>9</sup> To reduce the calculation times, the methyl group of the tosyl has been substituted by H. The calculations were performed by the quantum package Gaussian 16-A.03<sup>10</sup> The figures were obtained using the graphical program Molden.<sup>11</sup>

[1] R.G. Parr, Density Functional Theory of Atoms and Molecules, in: Horizons Quantum Chem., Springer Netherlands, 1980: pp. 5–15. DOI:10.1007/978-94-009-9027-2\_2.

[2] Y. Zhao, D.G. Truhlar, The M06 suite of density functionals for main group thermochemistry, thermochemical kinetics, noncovalent interactions, excited states, and transition elements: Two new functionals and systematic testing of four M06-class functionals and 12 other function, *Theor. Chem. Acc.* 120 (2008) 215–241, DOI: 10.1007/s00214-007-0310-x.

[3] Y. Zhao, D.G. Truhlar, Density functionals with broad applicability in chemistry, *Acc. Chem. Res.* 41 (2008) 157–167, DOI: 10.1021/ar700111a.

[4] A. Schaefer, H. Horn, and R. Ahlrichs, “Fully optimized contracted Gaussian-basis sets for atoms Li to Kr,” *J. Chem. Phys.*, 97 (1992) 2571–2577. DOI: 10.1063/1.463096.

[5] A. Schaefer, C. Huber, and R. Ahlrichs, “Fully optimized contracted Gaussian-basis sets of triple zeta valence quality for atoms Li to Kr,” *J. Chem. Phys.*, 100 (1994) 5829–5835. DOI: 10.1063/1.467146 .

[6] J. Foresman, A. Frisch, Exploring chemistry with electronic structure methods, 1996, Gaussian Inc, Pittsburgh, PA, 1996, <http://gaussian.com/expchem3/>(accessed June 4, 2021).

[7] R.F. Ribeiro, A.V. Marenich, C.J. Cramer, D.G. Truhlar, Use of solution-phase vibrational frequencies in continuum models for the free energy of solvation, *J. Phys. Chem. B.* 115 (2011) 14556–14562, DOI: 10.1021/jp205508z.

[8] A. V. Marenich, C. J. Cramer, and D. G. Truhlar, “Universal solvation model based on solute electron density and a continuum model of the solvent defined by the bulk dielectric constant and atomic surface tensions,” *J. Phys. Chem. B.* 113 (2009) 6378–6396. DOI: 10.1021/jp810292n .

[9] F. Furche and R. Ahlrichs, “Adiabatic time-dependent density functional methods for excited state properties,” *J. Chem. Phys.*, 117 (2002) 7433–7447. DOI: 10.1063/1.1508368

[10] D.J. Frisch, M. J.; Trucks, G. W.; Schlegel, H. B.; Scuseria, G. E.; Robb, M. A.; Cheeseman, J. R.; Scalmani, G.; Barone, V.; Petersson, G. A.; Nakatsuji, H.; Li, X.; Caricato, M.; Marenich, A. V.; Bloino, J.; Janesko, B. G.; Gomperts, R.; Mennucci, B.; Hratch, Gaussian 16, Revision A.03, (2016).

[11] G. Schaftenaar, J.H. Noordik, Molden: A pre- and post-processing program for molecular and electronic structures, *J. Comput. Aided. Mol. Des.* 14 (2000) 123–134, DOI: 10.1023/A:1008193805436.

**Table R.** Calculated absolute and relative (in kcal mol<sup>-1</sup>) energies for the palladium(II) reduction.

| <b>Pd(II) Reduction</b>                                              |          | E(DZ) /au   | $\Delta E^a$  | E(TZ) /au   | $\Delta E^b$  | ZPE /au | $E^{0K}$ /au | $\Delta E^{0K}$ <sup>c</sup> | $\delta G^{298K}$ /au | $G^{298K}$ /au | $\Delta n$ | $\Delta G_c^{298K}$ |
|----------------------------------------------------------------------|----------|-------------|---------------|-------------|---------------|---------|--------------|------------------------------|-----------------------|----------------|------------|---------------------|
| <i>trans</i> -(DMF) <sub>2</sub> Pd <sup>II</sup> (AcO) <sub>2</sub> | <b>0</b> | -1080.68473 |               | -1081.80391 |               | 0.30890 | -1081.495006 |                              | 0.25041               | -1081.553494   |            |                     |
| Ph <sub>3</sub> P                                                    |          | -1035.13659 |               | -1035.99747 |               | 0.27170 | -1035.725767 |                              | 0.22551               | -1035.771957   |            |                     |
| DMF                                                                  |          | -248.17312  |               | -248.45568  |               | 0.10131 | -248.354365  |                              | 0.07234               | -248.383342    |            |                     |
| <b>0 + 2 Ph<sub>3</sub>P + DMF</b>                                   |          | -3399.13104 | <b>0.00</b>   | -3402.25452 | <b>0.00</b>   | 0.95362 | -3401.300903 | <b>0.00</b>                  | 0.77377               | -3401.480748   | <b>0</b>   | <b>0.00</b>         |
| (DMF) <sub>3</sub> Pd <sup>0</sup> (Ph <sub>3</sub> P)               | <b>I</b> | -1907.63817 |               | -1909.37966 |               | 0.57903 | -1908.800638 |                              | 0.49813               | -1908.881536   |            |                     |
| Ph <sub>3</sub> P=O                                                  |          | -1110.30489 |               | -1111.27492 |               | 0.27695 | -1110.997973 |                              | 0.23044               | -1111.044485   |            |                     |
| (Ac) <sub>2</sub> O                                                  |          | -381.24469  |               | -381.68131  |               | 0.09768 | -381.583635  |                              | 0.06439               | -381.616920    |            |                     |
| <b>I + Ph<sub>3</sub>PO + Ac<sub>2</sub>O</b>                        |          | -3399.18775 | <b>-35.59</b> | -3402.33590 | <b>-51.07</b> | 0.95366 | -3401.382245 | <b>-51.04</b>                | 0.79296               | -3401.542940   | <b>-1</b>  | <b>-40.92</b>       |

<sup>a</sup> M06/def2-SVP; <sup>b</sup> M06/def2-TZVP; <sup>c</sup> M06/def2-TZVP energies combined with thermal corrections calculated with the M06/def2-SVP.

**Scheme 1.** The oxidative addition step to  $(\text{DMF})_3\text{Pd}^0(\text{PPh}_3)$ , **I** (Figure 4 in the article).

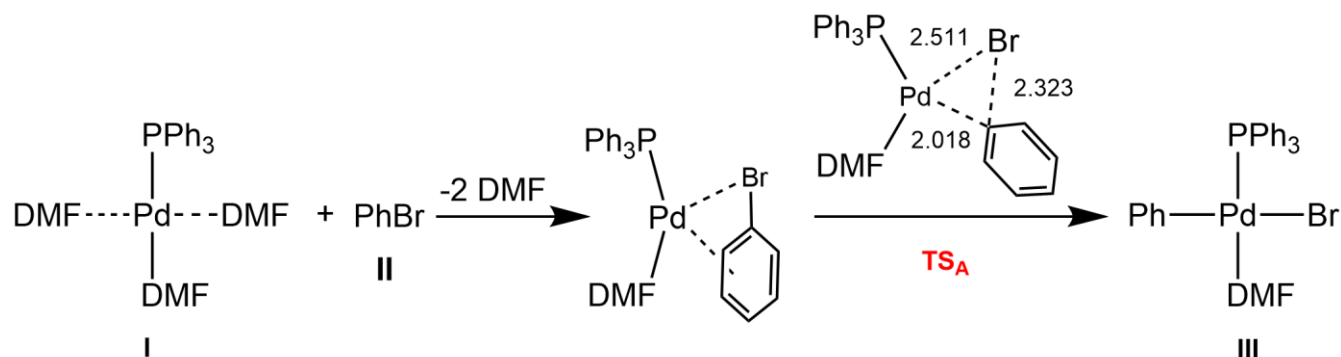

**Table 1.** Calculated absolute and relative (in kcal mol<sup>-1</sup>) energies for the oxidative addition step to  $(\text{DMF})_3\text{Pd}^0(\text{PPh}_3)$ , **I**.

| Scheme 1                                                          |                        | E(DZ) /au   | $\Delta E^a$  | E(TZ) /au   | $\Delta E^b$ | ZPE /au | $E^{0K}$ /au | $\Delta E^{0K}_c$ | $\delta G^{298K}$ /au | $G^{298K}$ /au | $\Delta n$ | $\Delta G^{298K}_c$ |
|-------------------------------------------------------------------|------------------------|-------------|---------------|-------------|--------------|---------|--------------|-------------------|-----------------------|----------------|------------|---------------------|
| $(\text{DMF})_3\text{Pd}^0(\text{PPh}_3)$                         | <b>I</b>               | -1907.63817 |               | -1909.37966 |              | 0.5790  | -1908.800638 |                   | 0.49813               | -1908.881536   |            |                     |
| Ph-Br                                                             | <b>II</b>              | -2805.04742 | <b>II</b>     | -2805.61567 | <b>II</b>    | 0.0898  | -2805.525808 |                   | 0.05896               | -2805.556708   |            |                     |
| <b>I + II</b>                                                     |                        | -4712.68559 | <b>0.00</b>   | -4714.99533 | <b>0.00</b>  |         | -4714.326445 | <b>0.00</b>       |                       | -4714.438243   | <b>0</b>   | <b>0.00</b>         |
| [PhBr * $\text{Pd}^0\text{Br}(\text{DMF})(\text{PPh}_3)$ ]        | <b>C-I</b>             | -4216.32727 |               | -4218.07798 |              | 0.4648  | -4217.613185 |                   | 0.39158               | -4217.686408   |            |                     |
| Dimer of DMF                                                      |                        | -496.35029  |               | -496.91239  |              | 0.2036  | -496.708749  |                   | 0.15844               | -496.753954    |            |                     |
| <b>C-I + (DMF)<sub>2</sub></b>                                    |                        | -4712.67757 | <b>5.03</b>   | -4714.99038 | <b>3.11</b>  |         | -4714.321934 | <b>2.83</b>       |                       | -4714.440362   | <b>0</b>   | <b>-1.33</b>        |
| <b>TSA<sub>A</sub></b>                                            | <b>TSA<sub>A</sub></b> | -4216.32064 |               | -4218.07188 |              | 0.4647  | -4217.607094 |                   | 0.39360               | -4217.678285   |            |                     |
| <b>TSA<sub>A</sub> + (DMF)<sub>2</sub></b>                        |                        | -4712.67093 | <b>9.20</b>   | -4714.98428 | <b>6.94</b>  |         | -4714.315844 | <b>6.65</b>       |                       | -4714.432240   | <b>0</b>   | <b>3.77</b>         |
| <i>trans</i> -[Ph- $\text{Pd}^0$ -Br<br>(DMF)(PPh <sub>3</sub> )] | <b>III</b>             | -4216.35406 |               | -4218.09845 |              | 0.4655  | -4217.632902 |                   | 0.39621               | -4217.702244   |            |                     |
| <b>III<sup>1</sup> + (DMF)<sub>2</sub></b>                        |                        | -4712.70435 | <b>-11.77</b> | -4715.01084 | <b>-9.73</b> |         | -4714.341651 | <b>9.54</b>       |                       | -4714.456198   | <b>0</b>   | <b>-11.27</b>       |

<sup>a</sup> M06/def2-SVP; <sup>b</sup> M06/def2-TZVP; <sup>c</sup> M06/def2-TZVP energies combined with thermal corrections calculated with the M06/def2-SVP.

**Scheme 2.** The oxidative addition step to  $(\text{DMF})_2\text{Pd}^0(\text{PPh}_3)_2$ , **I'**.

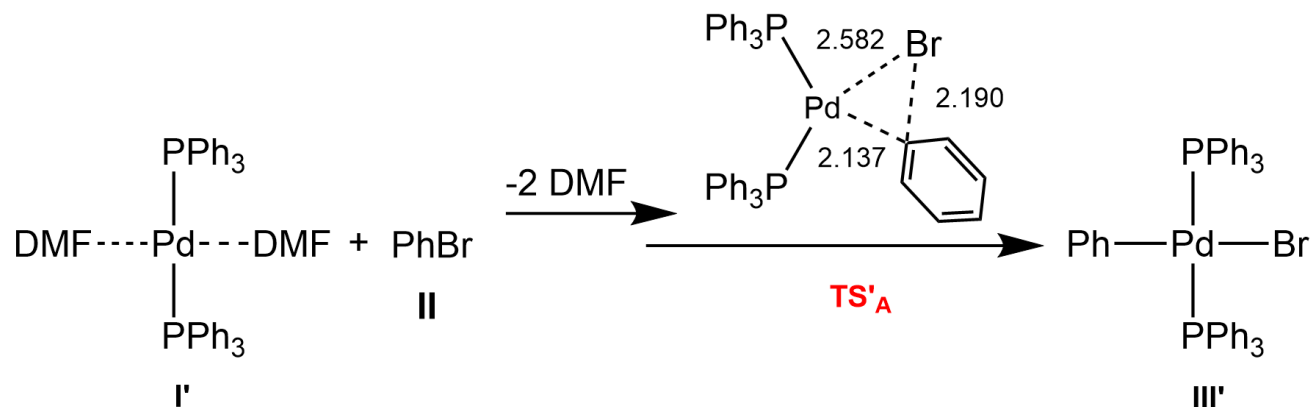

**Table 2.** Calculated absolute and relative (in kcal mol<sup>-1</sup>) energies for the oxidative addition step to  $(\text{DMF})_2\text{Pd}^0(\text{PPh}_3)_2$ , **I'**.

| Scheme 2                                                                          |             | E(DZ) /au   | $\Delta E^a$  | E(TZ) /au   | $\Delta E^b$ | ZPE /au     | $E^{0K}$ /au | $\Delta E^{0K}$ <sup>c</sup> | $\delta G^{298K}/a_u$ | $G^{298K}/a_u$ | $\Delta n$ | $\Delta G^{298K}_c$ |
|-----------------------------------------------------------------------------------|-------------|-------------|---------------|-------------|--------------|-------------|--------------|------------------------------|-----------------------|----------------|------------|---------------------|
| <i>trans</i> -(DMF) <sub>2</sub> Pd <sup>0</sup> (Ph <sub>3</sub> P) <sub>2</sub> | <b>I'</b>   | -2694.64018 |               | -2696.96564 |              | 0.7507<br>9 | -2696.21485  |                              | 0.65716               | -2696.30848    |            |                     |
| Ph-Br                                                                             | <b>II</b>   | -2805.04742 |               | -2805.61567 |              | 0.0898<br>6 | -2805.52581  |                              | 0.05896               | -2805.55671    |            |                     |
| <b>I' + II</b>                                                                    |             | -5499.68760 | <b>0.00</b>   | -5502.58131 | <b>0.00</b>  |             | -5501.74066  | <b>0.00</b>                  |                       | -5501.86519    | <b>0</b>   | <b>0.00</b>         |
| Dimer of DMF                                                                      |             | -496.35029  |               | -496.91239  |              | 0.2036<br>4 | -496.70875   |                              | 0.15844               | -496.75395     |            |                     |
| <b>TS<sub>OA</sub> to III'</b>                                                    | <b>TS'A</b> | -5003.31069 |               | -5005.63381 |              | 0.6345<br>4 | -5004.99926  |                              | 0.55172               | -5005.08209    |            |                     |
| <b>TS<sub>OA</sub> to III' + (DMF)<sub>2</sub></b>                                |             | -5499.66098 | <b>16.70</b>  | -5502.54620 | <b>22.03</b> |             | -5501.70801  | <b>20.49</b>                 |                       | -5501.83604    | <b>0</b>   | <b>18.29</b>        |
| <i>trans</i> -[Ph-Pd <sup>0</sup> -Br (Ph <sub>3</sub> P) <sub>2</sub> ]          | <b>III'</b> | -5003.36214 |               | -5005.68584 |              | 0.6369<br>9 | -5005.04886  |                              | 0.55495               | -5005.13090    |            |                     |
| <b>III' + (DMF)<sub>2</sub></b>                                                   |             | -5499.71243 | <b>-15.58</b> | -5502.59824 | <b>10.62</b> |             | -5501.75761  | <b>-10.63</b>                |                       | -5501.88485    | <b>0</b>   | <b>-12.34</b>       |

<sup>a</sup> M06/def2-SVP; <sup>b</sup> M06/def2-TZVP; <sup>c</sup> M06/def2-TZVP energies combined with thermal corrections calculated with the M06/def2-SVP.

**Figure 1.** Energy profiles in kcal mol<sup>-1</sup> (dashed lines are E+ZPE; thick lines are free energies) following the formation of intermediate **III**.

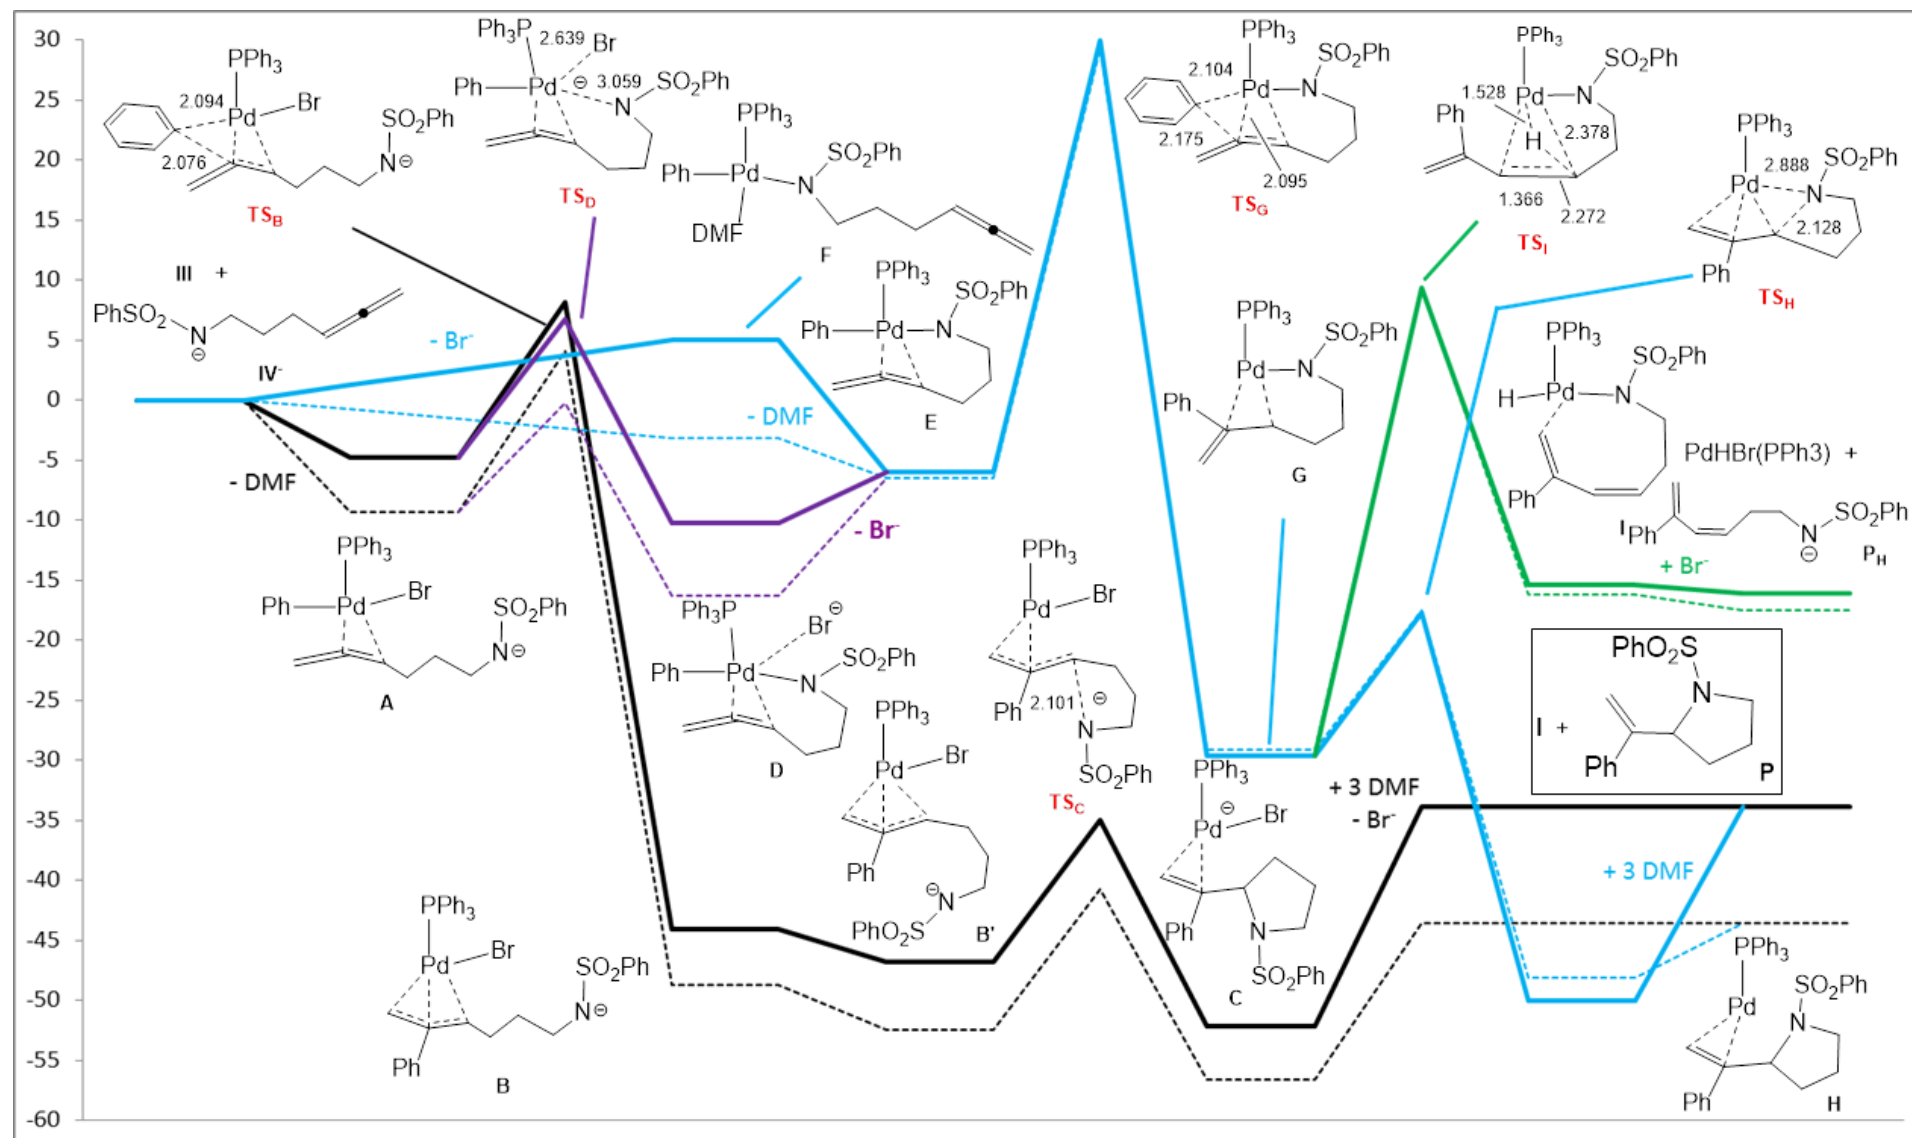

**Scheme 3.** The favoured pathway (black profiles in Figure 1).

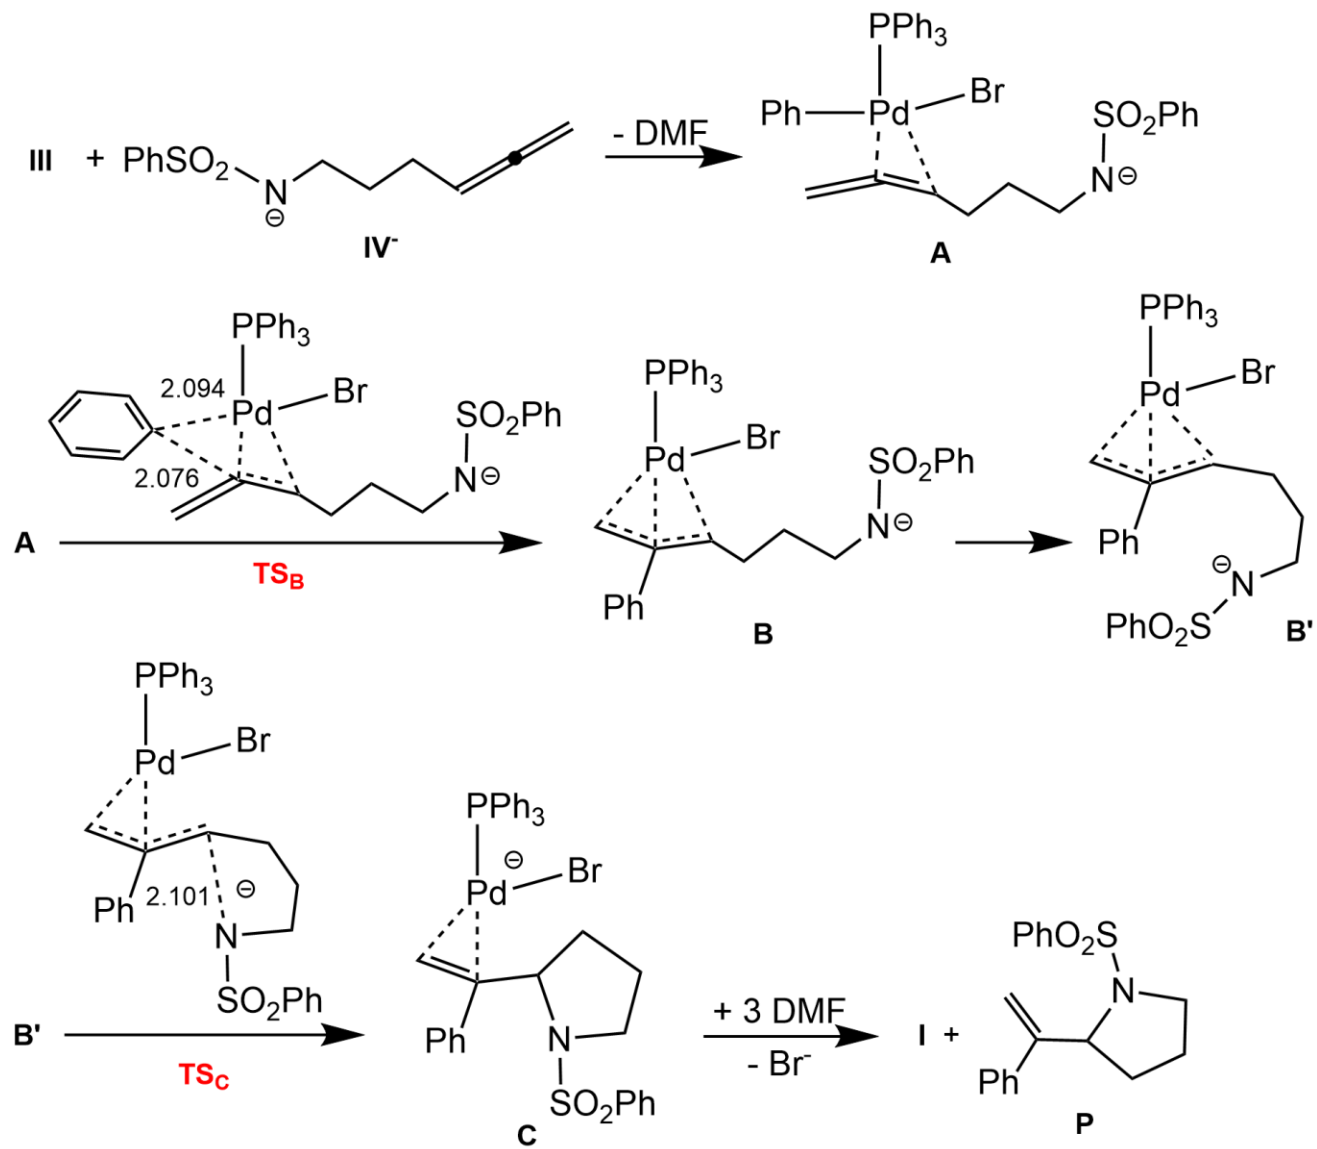

**Table 3.** Calculated absolute and relative energies for the favoured pathway.

| Scheme 3                                                                                             |                 | E(DZ) /au   | $\Delta E^a$  | E(TZ) /au   | $\Delta E^b$ | ZPE /au | $E^{0K}$ /au | $\Delta E^{0K}$ c | $\delta G^{298K}/a_u$ | $G^{298K}$ /au | $\Delta n$ | $\Delta G^{298K}$ c |
|------------------------------------------------------------------------------------------------------|-----------------|-------------|---------------|-------------|--------------|---------|--------------|-------------------|-----------------------|----------------|------------|---------------------|
| [Ph-Pd <sup>0</sup> -Br (DMF)(Ph <sub>3</sub> P)]                                                    | III             | -4216.35406 |               | -4218.09845 |              | 0.4655  |              |                   |                       |                |            |                     |
| PhSO <sub>2</sub> N <sup>-</sup> -CH <sub>2</sub> CH <sub>2</sub> CH <sub>2</sub> CHCCH <sub>2</sub> | IV <sup>-</sup> | -1067.98471 |               | -1068.93295 |              | 0.2343  | -4217.632902 |                   | 0.39621               | -4217.702244   |            |                     |
| III + IV <sup>-</sup>                                                                                |                 | -5284.33876 | <b>0.00</b>   | -5287.03140 | <b>0.00</b>  | 0.6005  | -5286.331493 | <b>0.00</b>       |                       | -5286.448100   | <b>0</b>   | <b>0.00</b>         |
| Int-A [Ph-Pd <sup>0</sup> -Br (Ph <sub>3</sub> P)(IV <sup>-</sup> )]                                 | A               | -5036.18903 |               | -5038.59253 |              | 0.6005  | -5037.991940 |                   | 0.52013               | -5038.072402   |            |                     |
| Int-A + DMF                                                                                          |                 | -5284.36215 | <b>-14.67</b> | -5287.04821 | <b>10.55</b> | -       | -5286.346305 | <b>-9.29</b>      |                       | -5286.455744   | <b>0</b>   | <b>-4.80</b>        |
| TS <sub>B</sub>                                                                                      | TS <sub>B</sub> | -5036.16303 |               | -5038.57005 |              | 0.5994  | -5037.970622 |                   | 0.51818               | -5038.051873   |            |                     |
| TS <sub>B</sub> + DMF                                                                                |                 | -5284.33615 | <b>1.64</b>   | -5287.02573 | <b>3.56</b>  | -       | -5286.324987 | <b>4.08</b>       |                       | -5286.435215   | <b>0</b>   | <b>8.09</b>         |
| Int-B Pd <sup>0</sup> -CCC bound                                                                     | B               | -5036.25709 |               | -5038.65911 |              | 0.6043  | -5038.054780 |                   | 0.52412               | -5038.134995   |            |                     |
| Int-B + DMF                                                                                          |                 | -5284.43021 | <b>-57.38</b> | -5287.11479 | <b>52.33</b> | -       | -5286.409145 | <b>-48.73</b>     |                       | -5286.518337   | <b>0</b>   | <b>-44.07</b>       |
| Int-B' Pd <sup>0</sup> -CCC & Tos <i>endo</i>                                                        | B'              | -5036.26403 |               | -5038.66511 |              | 0.6043  | -5038.060715 |                   | 0.52582               | -5038.139290   |            |                     |
| Int-B + DMF                                                                                          |                 | -5284.43715 | <b>-61.74</b> | -5287.12079 | <b>56.09</b> | -       | -5286.415080 | <b>-52.45</b>     |                       | -5286.522632   | <b>0</b>   | <b>-46.77</b>       |
| TS <sub>C</sub>                                                                                      | TS <sub>C</sub> | -5036.25036 |               | -5038.64611 |              | 0.6040  | -5038.042094 |                   | 0.52567               | -5038.120440   |            |                     |
| TS <sub>C</sub> + DMF                                                                                |                 | -5284.42348 | <b>-53.16</b> | -5287.10179 | <b>44.17</b> | -       | -5286.396458 | <b>-40.77</b>     |                       | -5286.503781   | <b>0</b>   | <b>-34.94</b>       |
| Int-C                                                                                                | C               | -5036.28260 |               | -5038.67329 |              | 0.6059  | -5038.067344 |                   | 0.52541               | -5038.147877   |            |                     |
| Int-C + DMF                                                                                          |                 | -5284.45572 | <b>-73.39</b> | -5287.12896 | <b>61.22</b> | -       | -5286.421709 | <b>-56.61</b>     |                       | -5286.531219   | <b>0</b>   | <b>-52.16</b>       |
| Product                                                                                              | P               | -1299.24017 |               | -1300.41816 |              | 0.3326  | -1300.085546 |                   | 0.28331               | -1300.134849   |            |                     |
| Br <sup>-</sup>                                                                                      |                 | -2573.88879 |               | -2574.22346 |              | 0.0000  | -2574.223457 |                   | -0.01618              | -2574.239633   |            |                     |
| P + Br <sup>-</sup> + I - (DMF) <sub>2</sub>                                                         |                 | -5284.41684 | <b>-48.99</b> | -5287.10889 | <b>48.63</b> | -       | -5286.40089  | <b>-43.55</b>     |                       | -5286.50206    | <b>0</b>   | <b>-33.86</b>       |

<sup>a</sup> M06/def2-SVP; <sup>b</sup> M06/def2-TZVP; <sup>c</sup> M06/def2-TZVP energies combined with thermal corrections calculated with the M06/def2-SVP.



**Scheme 4.** The alternative generation of intermediate **E** (violet and first part of blue profiles).

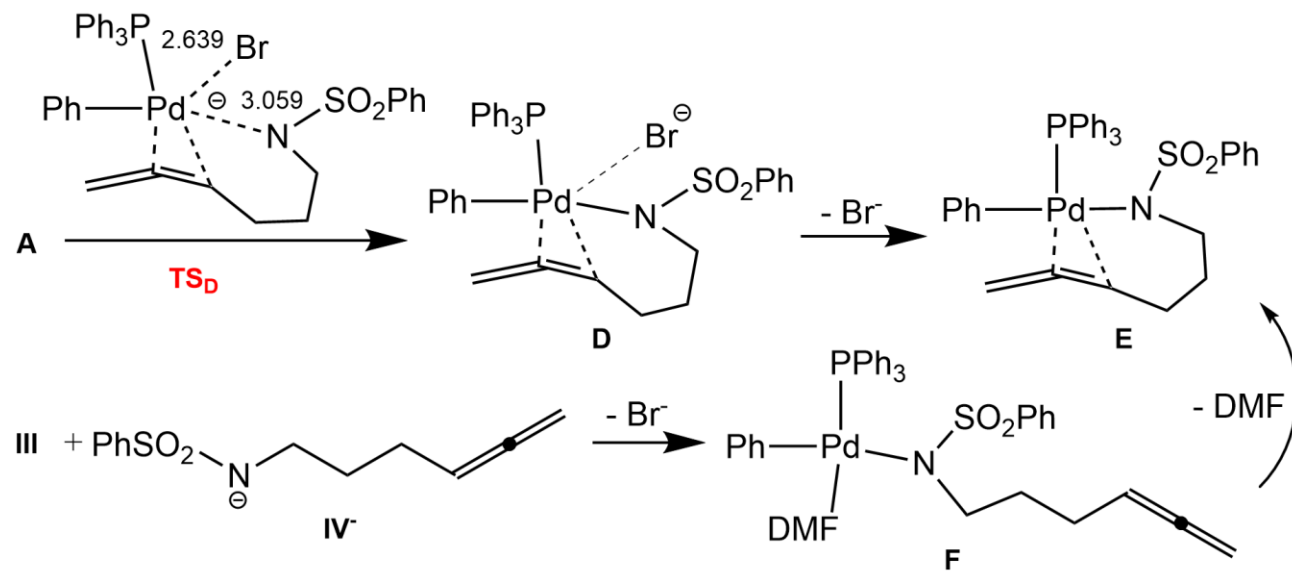

**Table 4.** Calculated absolute and relative energies for the alternative generation of **E**.

| <b>Scheme 4</b>                                                                                     |                       | E(DZ) /au   | $\Delta E^a$  | E(TZ) /au   | $\Delta E^b$  | ZPE /au | $E^{0K}$ /au | $\Delta E^{0K}$ <sup>c</sup> | $\delta G^{298K}$ /au | $G^{298K}$ /au | $\Delta n$ | $\Delta G_c^{298K}$ |
|-----------------------------------------------------------------------------------------------------|-----------------------|-------------|---------------|-------------|---------------|---------|--------------|------------------------------|-----------------------|----------------|------------|---------------------|
| <b>TS<sub>D</sub></b> from A                                                                        | <b>TS<sub>D</sub></b> | -5036.18071 |               | -5038.57799 |               | 0.60049 | -5037.977504 |                              | 0.52396               | -5038.054036   | <b>5.2</b> |                     |
| <b>TS<sub>D</sub> + DMF</b>                                                                         |                       | -5284.35383 | <b>-9.46</b>  | -5287.03367 | <b>-1.43</b>  |         | -5286.331868 | <b>-0.24</b>                 |                       | -5286.437377   | <b>0</b>   | <b>6.73</b>         |
| Int-D <i>N bound to Pd</i>                                                                          | <b>D</b>              | -5036.20505 |               | -5038.60455 |               | 0.60138 | -5038.003168 |                              | 0.52348               | -5038.081074   |            |                     |
| <b>Int-D + DMF</b>                                                                                  |                       | -5284.37817 | <b>-24.73</b> | -5287.06023 | <b>-18.09</b> |         | -5286.357533 | <b>-16.34</b>                |                       | -5286.464416   | <b>0</b>   | <b>-10.24</b>       |
| Int-E                                                                                               | <b>E</b>              | -2462.29172 |               | -2464.36569 |               | 0.60166 | -2463.764032 |                              | 0.52803               | -2463.837661   |            |                     |
| <b>Int-E + Br<sup>-</sup> + DMF</b>                                                                 |                       | -5284.35363 | <b>-9.33</b>  | -5287.04482 | <b>-8.43</b>  |         | -5286.341853 | <b>-6.50</b>                 |                       | -5286.460635   | <b>1</b>   | <b>-5.97</b>        |
| <i>trans</i> -[Ph-Pd <sup>0</sup> -Br<br>(DMF)(Ph <sub>3</sub> P)]                                  | <b>III</b>            | -4216.35406 |               | -4218.09845 |               | 0.46555 | -4217.632902 |                              | 0.39621               | -4217.702244   |            |                     |
| PhSO <sub>2</sub> N <sup>-</sup> CH <sub>2</sub> CH <sub>2</sub> CH <sub>2</sub> CHCCH <sub>2</sub> | <b>IV<sup>-</sup></b> | -1067.98471 |               | -1068.93295 |               | 0.23436 | -1068.698591 |                              | 0.18709               | -1068.745856   |            |                     |
| <b>III + IV<sup>-</sup></b>                                                                         |                       | -5284.33876 | <b>0.00</b>   | -5287.03140 | <b>0.00</b>   |         | -5286.331493 | <b>0.00</b>                  |                       | -5286.448100   | <b>0</b>   | <b>0.00</b>         |
| Int-F                                                                                               | <b>F</b>              | -2710.45551 |               | -2712.81565 |               | 0.70258 | -2712.113075 |                              | 0.61510               | -2712.200551   |            |                     |
| <b>Int-F + Br<sup>-</sup></b>                                                                       |                       | -5284.34430 | <b>-3.47</b>  | -5287.03911 | <b>-4.84</b>  |         | -5286.336532 | <b>-3.16</b>                 |                       | -5286.440183   | <b>0</b>   | <b>4.97</b>         |
| <b>Int-E + Br<sup>-</sup> + DMF</b>                                                                 |                       | -5284.35363 | <b>-9.33</b>  | -5287.04482 | <b>-8.43</b>  |         | -5286.341853 | <b>-6.50</b>                 |                       | -5286.460635   | <b>1</b>   | <b>-5.97</b>        |

<sup>a</sup> M06/def2-SVP; <sup>b</sup> M06/def2-TZVP; <sup>c</sup> M06/def2-TZVP energies combined with thermal corrections calculated with the M06/def2-SVP.

**Scheme 5.** The alternative pathways (blue and green profiles).

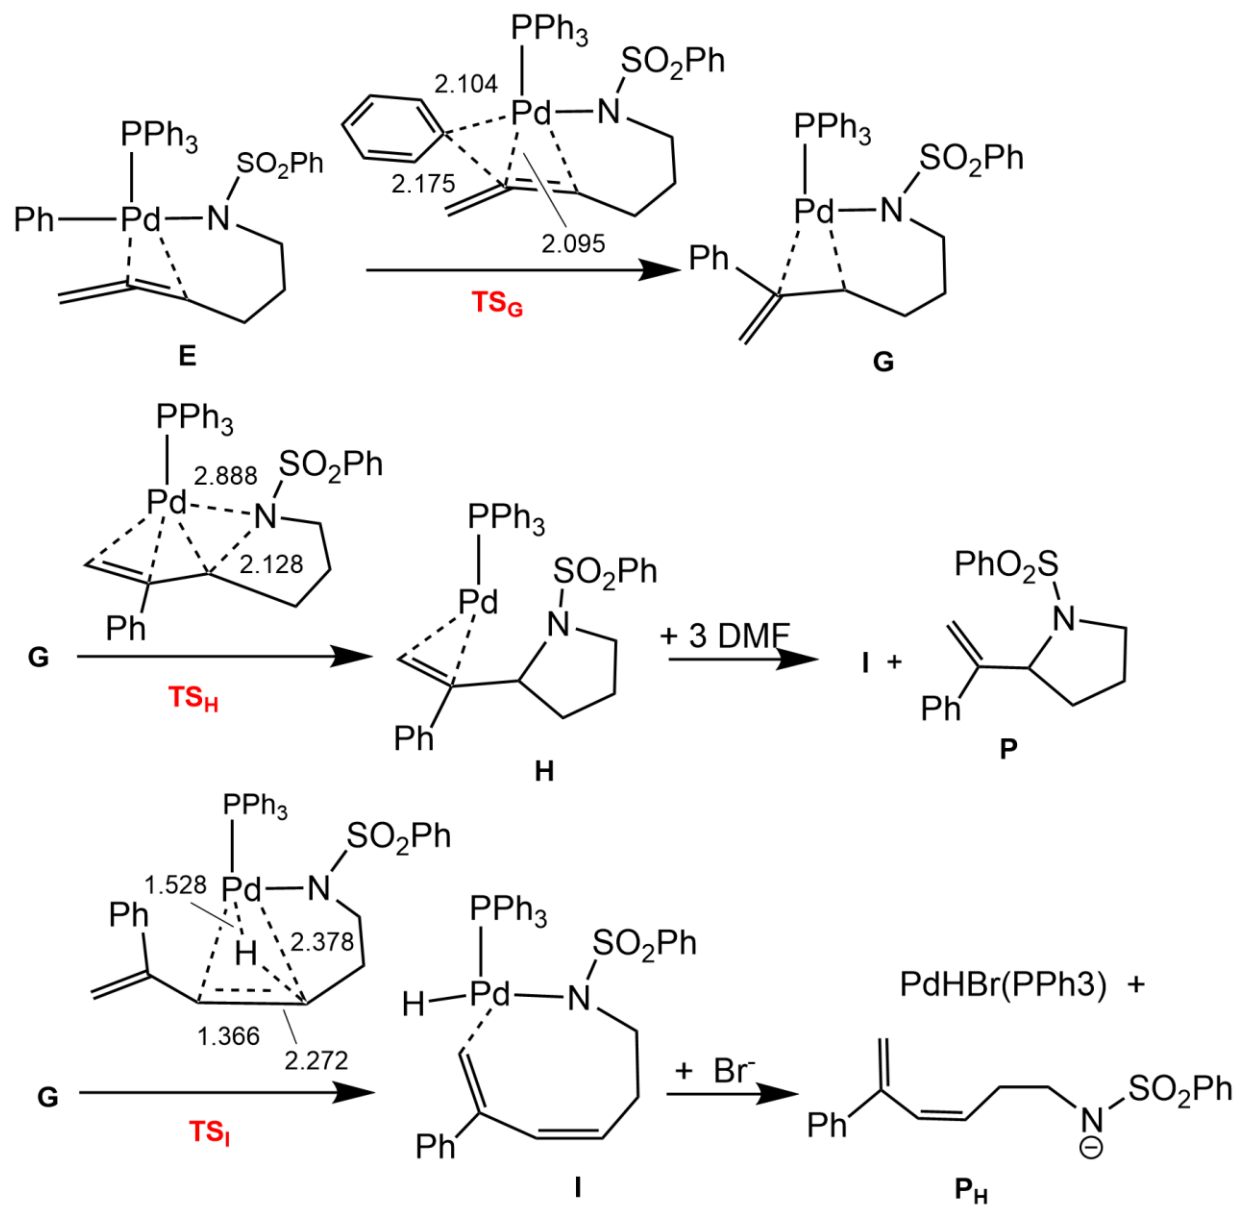

**Table 5.** Calculated absolute and relative energies for the alternative pathways.

| Scheme 5                                                                                             |                       | E(DZ) /au   | $\Delta E^a$  | E(TZ) /au   | $\Delta E^b$  | ZPE /au | $E^{0K}$ /au | $\Delta E^{0K c}$ | $\delta G_u^{298K/a}$ | $G^{298K}/au$ | $\Delta n$ | $\Delta G_c^{298K}$ |
|------------------------------------------------------------------------------------------------------|-----------------------|-------------|---------------|-------------|---------------|---------|--------------|-------------------|-----------------------|---------------|------------|---------------------|
| <b>TS<sub>G</sub></b> from E                                                                         | <b>TS<sub>G</sub></b> | -2462.23374 |               | -2464.30749 |               | 0.60046 | -2463.707024 |                   | 0.52702               | -2463.780471  |            |                     |
| <b>TS<sub>G</sub> + Br<sup>-</sup> + DMF</b>                                                         |                       | -5284.29564 | <b>27.06</b>  | -5286.98662 | <b>28.10</b>  |         | -5286.284846 | <b>29.27</b>      |                       | -5286.403445  | <b>1</b>   | <b>29.92</b>        |
| Int-G Pd on C4                                                                                       | <b>G</b>              | -2462.33596 |               | -2464.40509 |               | 0.60499 | -2463.800097 |                   | 0.52974               | -2463.875345  |            |                     |
| <b>Int-G + Br<sup>-</sup> + DMF</b>                                                                  |                       | -5284.39786 | <b>-37.09</b> | -5287.08422 | <b>-33.15</b> |         | -5286.377918 | <b>-29.13</b>     |                       | -5286.498319  | <b>1</b>   | <b>-29.62</b>       |
| <b>TS<sub>H</sub></b>                                                                                | <b>TS<sub>H</sub></b> | -2462.31799 |               | -2464.38491 |               | 0.60333 | -2463.781579 |                   | 0.52848               | -2463.856428  |            |                     |
| <b>TS<sub>H</sub> + Br<sup>-</sup> + DMF</b>                                                         |                       | -5284.37990 | <b>-25.81</b> | -5287.06404 | <b>-20.49</b> |         | -5286.359400 | <b>-17.51</b>     |                       | -5286.479402  | <b>1</b>   | <b>-17.75</b>       |
| Int-H N on C4                                                                                        | <b>H</b>              | -2462.35936 |               | -2464.43606 |               | 0.60570 | -2463.830360 |                   | 0.52813               | -2463.907924  |            |                     |
| <b>Int-H + Br<sup>-</sup> + DMF</b>                                                                  |                       | -5284.42127 | <b>-51.77</b> | -5287.11519 | <b>-52.58</b> |         | -5286.40818  | <b>-48.12</b>     |                       | -5286.53090   | <b>1</b>   | <b>-50.06</b>       |
| <b>P + Br<sup>-</sup> + I - (DMF)<sub>2</sub></b>                                                    |                       | -5284.41684 | <b>-48.99</b> | -5287.10889 | <b>-48.63</b> |         | -5286.40089  | <b>-43.55</b>     |                       | -5286.50206   | <b>0</b>   | <b>-33.86</b>       |
| <b>TS<sub>I</sub></b> from G                                                                         | <b>TS<sub>I</sub></b> | -2462.26577 |               | -2464.33852 |               | 0.59968 | -2463.738836 |                   | 0.52521               | -2463.813305  |            |                     |
| <b>TS<sub>I</sub> + Br<sup>-</sup> + DMF</b>                                                         |                       | -5284.32767 | <b>6.96</b>   | -5287.01765 | <b>8.62</b>   |         | -5286.316657 | <b>9.31</b>       |                       | -5286.436279  | <b>1</b>   | <b>9.31</b>         |
| Int-I                                                                                                | <b>I</b>              | -2462.30548 |               | -2464.38041 |               | 0.60092 | -2463.779488 |                   | 0.52775               | -2463.852655  |            |                     |
| <b>Int-I + Br<sup>-</sup> + DMF</b>                                                                  |                       | -5284.36739 | <b>-17.96</b> | -5287.05954 | <b>-17.66</b> |         | -5286.357309 | <b>-16.20</b>     |                       | -5286.475629  | <b>1</b>   | <b>-15.38</b>       |
| PhSO <sub>2</sub> N <sup>-</sup> H <sub>2</sub> ) <sub>2</sub> (CH <sub>2</sub> )(Ph)CH <sub>2</sub> | <b>P<sub>H</sub></b>  | -1298.71813 |               | -1299.90655 |               | 0.31717 | -1299.589371 |                   | 0.26638               | -1299.640162  |            |                     |
| [HPd <sup>0</sup> -Br (DMF)(Ph <sub>3</sub> P)]                                                      | <b>V</b>              | -3985.65302 |               | -3987.15274 |               | 0.38276 | -3986.769978 |                   | 0.31913               | -3986.833614  |            |                     |
| <b>P<sub>H</sub> + V</b>                                                                             |                       | -5284.37115 | <b>-20.33</b> | -5287.05929 | <b>-17.50</b> |         | -5286.359349 | <b>-17.48</b>     |                       | -5286.473776  | <b>0</b>   | <b>-16.11</b>       |

<sup>a</sup> M06/def2-SVP; <sup>b</sup> M06/def2-TZVP; <sup>c</sup> M06/def2-TZVP enegies combined with thermal corrections calculated with the M06/def2-SVP.

**Scheme 6.** The excited states pathways (Figure 6 in the article).

**SINGLET EXCITED STATE PATHWAY**

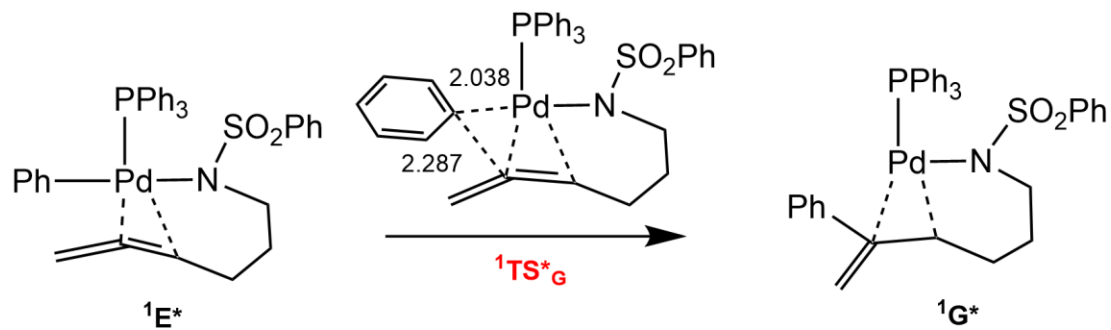

**TRIPLET EXCITED STATE PATHWAY**

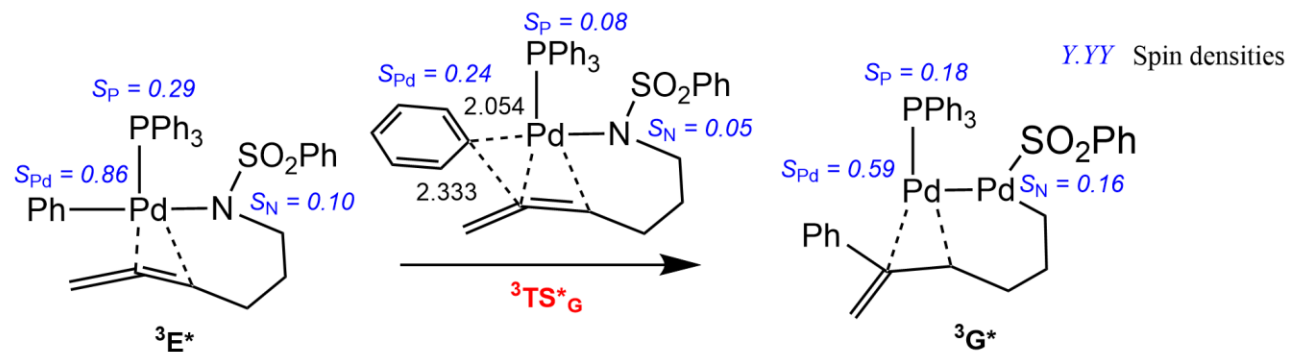

**Table 6.** Calculated absolute and relative energies for the excited states pathways.

| <b>Scheme 6 (EXCITED STATES)</b>                 |                       | E(DZ) /au   | $\Delta E^a$  | $\Delta E$ vs III + IV <sup>-</sup> |
|--------------------------------------------------|-----------------------|-------------|---------------|-------------------------------------|
| <sup>1</sup> Int-E* at Geom Ground State         |                       | -2462.17483 |               | <b>64.02</b>                        |
| <sup>1</sup> Int-E*                              | <sup>1</sup> E*       | -2462.20616 | <b>0.00</b>   | <b>44.36</b>                        |
| <sup>1</sup> TS* <sub>G</sub>                    | <sup>1</sup> TS*<br>G | -2462.19386 | <b>7.72</b>   | <b>52.08</b>                        |
| <sup>1</sup> Int-G*                              | <sup>1</sup> G*       | -2462.27963 | <b>-46.10</b> | <b>-1.74</b>                        |
| <sup>3</sup> Int-E* at Geom. <sup>1</sup> Int-E* |                       | -2462.21396 | <b>-4.89</b>  | <b>39.47</b>                        |
| <sup>3</sup> Int-E*                              | <sup>3</sup> E*       | -2462.22193 | <b>0.00</b>   | <b>34.47</b>                        |
| <sup>3</sup> TS* <sub>G</sub>                    | <sup>3</sup> TS*<br>G | -2462.21139 | <b>6.61</b>   | <b>41.08</b>                        |
| <sup>3</sup> Int-G*                              | <sup>3</sup> G*       | -2462.29743 | <b>-47.38</b> | <b>-12.91</b>                       |

<sup>a</sup> M06/def2-SVP.

**Pictures and Cartesian coordinates of optimized structures M06/def2-TZVP.**

**01** *trans*-(DMF)<sub>2</sub>Pd<sup>II</sup>(AcO)<sub>2</sub>

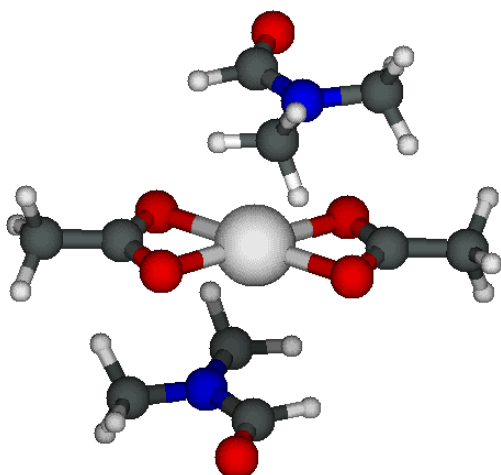


---

|    |    |   |           |           |           |
|----|----|---|-----------|-----------|-----------|
| 1  | 46 | 0 | -0.065390 | 0.005724  | 0.165183  |
| 2  | 8  | 0 | -0.058067 | 0.188581  | 2.209854  |
| 3  | 6  | 0 | 1.207096  | 0.100944  | 2.215955  |
| 4  | 8  | 0 | 1.767572  | -0.051293 | 1.087086  |
| 5  | 6  | 0 | 1.979928  | 0.155465  | 3.470704  |
| 6  | 1  | 0 | 1.571572  | 0.923558  | 4.128613  |
| 7  | 1  | 0 | 1.888999  | -0.806379 | 3.981969  |
| 8  | 1  | 0 | 3.032555  | 0.348575  | 3.268729  |
| 9  | 8  | 0 | -0.072705 | -0.177177 | -1.879478 |
| 10 | 6  | 0 | -1.337863 | -0.089498 | -1.885602 |
| 11 | 8  | 0 | -1.898358 | 0.062785  | -0.756747 |
| 12 | 6  | 0 | -2.110678 | -0.144006 | -3.140362 |
| 13 | 1  | 0 | -1.702194 | -0.911972 | -3.798342 |
| 14 | 1  | 0 | -3.163278 | -0.337293 | -2.938423 |
| 15 | 1  | 0 | -2.019881 | 0.817900  | -3.651533 |
| 16 | 8  | 0 | 1.117441  | -3.590953 | -0.661562 |
| 17 | 6  | 0 | 0.323599  | -3.326707 | 0.218551  |
| 18 | 7  | 0 | -1.012594 | -3.231292 | 0.079764  |
| 19 | 1  | 0 | 0.636861  | -3.134679 | 1.264774  |
| 20 | 6  | 0 | -1.875307 | -2.983537 | 1.206445  |
| 21 | 1  | 0 | -2.472201 | -2.080442 | 1.044962  |
| 22 | 1  | 0 | -2.559984 | -3.823635 | 1.360972  |
| 23 | 1  | 0 | -1.278030 | -2.850353 | 2.108918  |
| 24 | 6  | 0 | -1.651956 | -3.445940 | -1.193420 |
| 25 | 1  | 0 | -2.223404 | -4.379934 | -1.191293 |
| 26 | 1  | 0 | -2.347703 | -2.627914 | -1.405643 |
| 27 | 1  | 0 | -0.897300 | -3.493593 | -1.976787 |
| 28 | 8  | 0 | -1.247395 | 3.602728  | 0.989661  |
| 29 | 6  | 0 | -0.452954 | 3.338090  | 0.110204  |
| 30 | 7  | 0 | 0.883124  | 3.242515  | 0.249992  |
| 31 | 1  | 0 | -0.765491 | 3.145808  | -0.936190 |
| 32 | 6  | 0 | 1.746602  | 2.994473  | -0.876039 |
| 33 | 1  | 0 | 2.431118  | 3.834701  | -1.030586 |
| 34 | 1  | 0 | 2.343683  | 2.091648  | -0.713772 |
| 35 | 1  | 0 | 1.149906  | 2.860637  | -1.778799 |
| 36 | 6  | 0 | 1.521581  | 3.457611  | 1.523558  |
| 37 | 1  | 0 | 2.217394  | 2.639824  | 1.736475  |
| 38 | 1  | 0 | 2.092800  | 4.391749  | 1.521607  |
| 39 | 1  | 0 | 0.766385  | 3.505271  | 2.306403  |

---

02 PPh<sub>3</sub>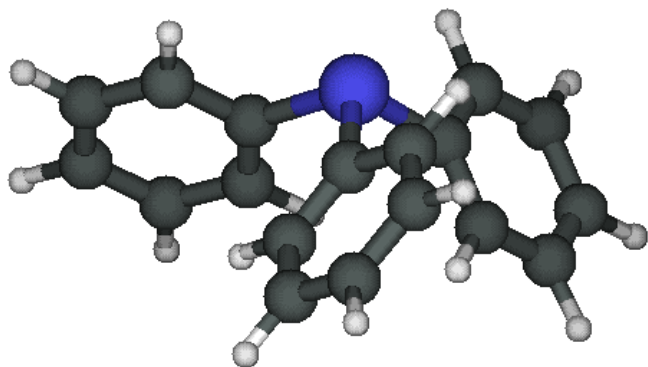


---

|    |    |   |           |           |           |
|----|----|---|-----------|-----------|-----------|
| 1  | 6  | 0 | -0.002495 | 0.020455  | 0.018939  |
| 2  | 6  | 0 | 0.003590  | -0.010096 | 1.412319  |
| 3  | 6  | 0 | 1.225148  | -0.031771 | 2.077016  |
| 4  | 6  | 0 | 2.413431  | -0.027282 | 1.362578  |
| 5  | 6  | 0 | 2.395342  | -0.009017 | -0.022299 |
| 6  | 6  | 0 | 1.182978  | 0.011447  | -0.694819 |
| 7  | 15 | 0 | -1.633375 | -0.033272 | 2.234880  |
| 8  | 6  | 0 | -2.036174 | -1.820348 | 2.226795  |
| 9  | 6  | 0 | -1.137862 | -2.832364 | 1.905043  |
| 10 | 6  | 0 | -1.533897 | -4.160528 | 1.941841  |
| 11 | 6  | 0 | -2.827638 | -4.493191 | 2.308101  |
| 12 | 6  | 0 | -3.730695 | -3.492123 | 2.632047  |
| 13 | 6  | 0 | -3.338838 | -2.165906 | 2.581556  |
| 14 | 6  | 0 | -1.182411 | 0.248464  | 3.987902  |
| 15 | 6  | 0 | -1.028724 | -0.755219 | 4.938116  |
| 16 | 6  | 0 | -0.679403 | -0.439798 | 6.242593  |
| 17 | 6  | 0 | -0.471776 | 0.879033  | 6.610378  |
| 18 | 6  | 0 | -0.621395 | 1.887526  | 5.670232  |
| 19 | 6  | 0 | -0.983706 | 1.573561  | 4.372427  |
| 20 | 1  | 0 | -1.178736 | -1.794608 | 4.663711  |
| 21 | 1  | 0 | -0.564614 | -1.232208 | 6.974029  |
| 22 | 1  | 0 | -0.197162 | 1.122756  | 7.630475  |
| 23 | 1  | 0 | -0.464209 | 2.922749  | 5.951890  |
| 24 | 1  | 0 | -1.111054 | 2.367289  | 3.640598  |
| 25 | 1  | 0 | -0.117591 | -2.587864 | 1.626578  |
| 26 | 1  | 0 | -0.824335 | -4.940001 | 1.687001  |
| 27 | 1  | 0 | -3.134390 | -5.532624 | 2.337540  |
| 28 | 1  | 0 | -4.746146 | -3.745272 | 2.915732  |
| 29 | 1  | 0 | -4.051893 | -1.382443 | 2.824965  |
| 30 | 1  | 0 | 1.255652  | -0.056973 | 3.161792  |
| 31 | 1  | 0 | 3.358924  | -0.042962 | 1.893414  |
| 32 | 1  | 0 | 3.325896  | -0.006922 | -0.578577 |
| 33 | 1  | 0 | 1.161312  | 0.029732  | -1.778768 |
| 34 | 1  | 0 | -0.950951 | 0.047884  | -0.511299 |

---



03 DMF

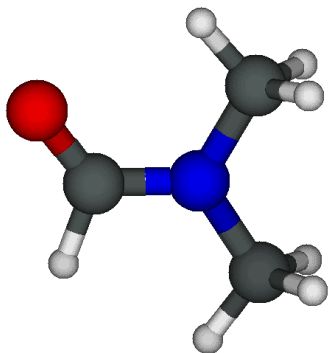


---

|    |   |   |           |           |           |
|----|---|---|-----------|-----------|-----------|
| 1  | 6 | 0 | 0.866614  | -0.628827 | -0.000041 |
| 2  | 8 | 0 | 1.948497  | -0.075458 | 0.000067  |
| 3  | 1 | 0 | 0.763658  | -1.731702 | -0.000100 |
| 4  | 7 | 0 | -0.333753 | -0.023058 | -0.000151 |
| 5  | 6 | 0 | -1.561821 | -0.774314 | 0.000059  |
| 6  | 6 | 0 | -0.453595 | 1.412672  | 0.000009  |
| 7  | 1 | 0 | -2.159297 | -0.538226 | -0.886004 |
| 8  | 1 | 0 | -1.343949 | -1.842618 | 0.000114  |
| 9  | 1 | 0 | -2.159071 | -0.538099 | 0.886244  |
| 10 | 1 | 0 | -1.000468 | 1.750096  | -0.885659 |
| 11 | 1 | 0 | -0.998879 | 1.750120  | 0.886656  |
| 12 | 1 | 0 | 0.539114  | 1.858315  | -0.000892 |

---

04 (DMF)<sub>3</sub>Pd<sup>0</sup>(PPh<sub>3</sub>), I

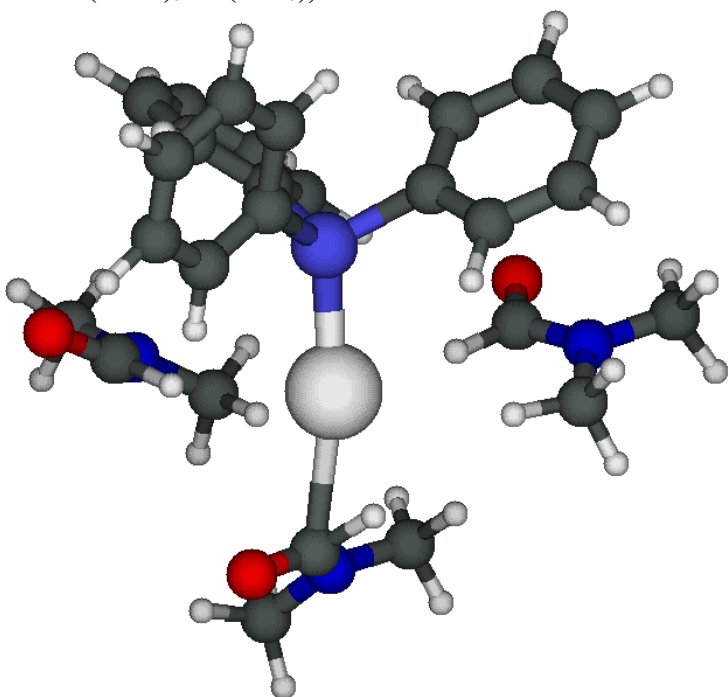


---

|   |    |   |           |          |           |
|---|----|---|-----------|----------|-----------|
| 1 | 46 | 0 | -0.156141 | 0.111506 | 0.053966  |
| 2 | 15 | 0 | -0.058097 | 0.063502 | 2.311088  |
| 3 | 8  | 0 | 1.305681  | 0.186160 | -2.655245 |
| 4 | 6  | 0 | -1.510718 | 0.776685 | 3.167445  |
| 5 | 6  | 0 | -2.257175 | 0.115681 | 4.135791  |
| 6 | 6  | 0 | -3.374662 | 0.719326 | 4.693927  |
| 7 | 6  | 0 | -3.747790 | 1.993942 | 4.303584  |

---

|    |   |   |           |           |           |
|----|---|---|-----------|-----------|-----------|
| 8  | 6 | 0 | -2.995548 | 2.670431  | 3.353852  |
| 9  | 6 | 0 | -1.891818 | 2.061874  | 2.785361  |
| 10 | 1 | 0 | -1.974676 | -0.880432 | 4.458572  |
| 11 | 1 | 0 | -3.953021 | 0.188242  | 5.441773  |
| 12 | 1 | 0 | -4.622639 | 2.462846  | 4.739746  |
| 13 | 1 | 0 | -3.278147 | 3.671401  | 3.046438  |
| 14 | 1 | 0 | -1.318238 | 2.585064  | 2.023997  |
| 15 | 6 | 0 | 0.073349  | -1.631531 | 2.987524  |
| 16 | 6 | 0 | 1.159923  | -2.063299 | 3.740163  |
| 17 | 6 | 0 | 1.247842  | -3.383413 | 4.158670  |
| 18 | 6 | 0 | 0.248353  | -4.284380 | 3.837760  |
| 19 | 6 | 0 | -0.841400 | -3.863066 | 3.088292  |
| 20 | 6 | 0 | -0.922805 | -2.552153 | 2.656674  |
| 21 | 1 | 0 | 1.955349  | -1.372893 | 3.999866  |
| 22 | 1 | 0 | 2.104713  | -3.704366 | 4.740574  |
| 23 | 1 | 0 | 0.317015  | -5.315348 | 4.166466  |
| 24 | 1 | 0 | -1.628118 | -4.563524 | 2.829560  |
| 25 | 1 | 0 | -1.777633 | -2.240618 | 2.059764  |
| 26 | 6 | 0 | 1.339021  | 0.930444  | 3.105090  |
| 27 | 6 | 0 | 1.302244  | 1.340677  | 4.435004  |
| 28 | 6 | 0 | 2.406800  | 1.944346  | 5.010598  |
| 29 | 6 | 0 | 3.560970  | 2.136903  | 4.266003  |
| 30 | 6 | 0 | 3.607575  | 1.728102  | 2.943394  |
| 31 | 6 | 0 | 2.498270  | 1.132779  | 2.364657  |
| 32 | 1 | 0 | 0.406544  | 1.180369  | 5.027802  |
| 33 | 1 | 0 | 2.368487  | 2.263668  | 6.046060  |
| 34 | 1 | 0 | 4.425055  | 2.610050  | 4.718791  |
| 35 | 1 | 0 | 4.507323  | 1.879062  | 2.357698  |
| 36 | 1 | 0 | 2.522765  | 0.818780  | 1.323529  |
| 37 | 6 | 0 | 0.130958  | -0.016620 | -2.418268 |
| 38 | 8 | 0 | 3.340666  | -2.638594 | 0.851637  |
| 39 | 6 | 0 | 2.221749  | -2.599432 | 0.378264  |
| 40 | 7 | 0 | 1.409888  | -3.655739 | 0.179093  |
| 41 | 1 | 0 | 1.739233  | -1.647281 | 0.057486  |
| 42 | 6 | 0 | 0.138081  | -3.519593 | -0.483786 |
| 43 | 6 | 0 | 1.825195  | -4.994730 | 0.515757  |
| 44 | 1 | 0 | 0.143355  | -4.039124 | -1.448053 |
| 45 | 1 | 0 | -0.662761 | -3.946057 | 0.129540  |
| 46 | 1 | 0 | -0.078469 | -2.458805 | -0.650117 |
| 47 | 1 | 0 | 2.039886  | -5.577305 | -0.386549 |
| 48 | 1 | 0 | 2.720974  | -4.952970 | 1.132944  |
| 49 | 1 | 0 | 1.029696  | -5.502827 | 1.068224  |
| 50 | 8 | 0 | -4.082920 | -1.562452 | 1.219152  |
| 51 | 6 | 0 | -3.603979 | -0.560282 | 0.720961  |
| 52 | 7 | 0 | -4.244308 | 0.604308  | 0.513239  |
| 53 | 6 | 0 | -3.603946 | 1.707452  | -0.157426 |
| 54 | 6 | 0 | -5.627672 | 0.782030  | 0.877321  |
| 55 | 1 | 0 | -3.690013 | 2.619086  | 0.441917  |
| 56 | 1 | 0 | -2.541535 | 1.486921  | -0.304581 |
| 57 | 1 | 0 | -4.067568 | 1.894170  | -1.132216 |
| 58 | 1 | 0 | -5.738577 | 1.670507  | 1.506195  |
| 59 | 1 | 0 | -6.249616 | 0.914770  | -0.013804 |
| 60 | 1 | 0 | -5.973217 | -0.091931 | 1.426337  |
| 61 | 1 | 0 | -2.542557 | -0.507815 | 0.384681  |
| 62 | 7 | 0 | -0.606259 | -1.041832 | -2.877637 |
| 63 | 1 | 0 | -0.499760 | 0.727107  | -1.828308 |
| 64 | 6 | 0 | -2.024208 | -1.153071 | -2.636589 |
| 65 | 6 | 0 | -0.005533 | -2.039726 | -3.731575 |
| 66 | 1 | 0 | -2.566412 | -1.192295 | -3.585952 |

|    |   |   |           |           |           |
|----|---|---|-----------|-----------|-----------|
| 67 | 1 | 0 | -2.251119 | -2.064934 | -2.073342 |
| 68 | 1 | 0 | -2.375917 | -0.291645 | -2.068054 |
| 69 | 1 | 0 | -0.167109 | -1.806461 | -4.788999 |
| 70 | 1 | 0 | 1.066050  | -2.091416 | -3.541432 |
| 71 | 1 | 0 | -0.456462 | -3.011080 | -3.520018 |

---

**05 (Ac)<sub>2</sub>O**

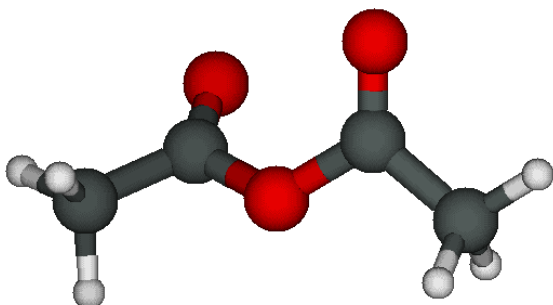

|    |   |   |           |           |           |
|----|---|---|-----------|-----------|-----------|
| 1  | 6 | 0 | -1.191919 | 0.083120  | -0.157451 |
| 2  | 8 | 0 | 0.000007  | -0.590859 | -0.000046 |
| 3  | 6 | 0 | 1.191913  | 0.083126  | 0.157441  |
| 4  | 8 | 0 | 1.258642  | 1.155109  | 0.669745  |
| 5  | 6 | 0 | 2.317818  | -0.747476 | -0.334464 |
| 6  | 1 | 0 | 2.278639  | -1.739638 | 0.118467  |
| 7  | 1 | 0 | 2.222285  | -0.882089 | -1.414482 |
| 8  | 1 | 0 | 3.267293  | -0.269475 | -0.105482 |
| 9  | 8 | 0 | -1.258680 | 1.155110  | -0.669733 |
| 10 | 6 | 0 | -2.317790 | -0.747502 | 0.334497  |
| 11 | 1 | 0 | -2.278614 | -1.739660 | -0.118442 |
| 12 | 1 | 0 | -2.222205 | -0.882120 | 1.414509  |
| 13 | 1 | 0 | -3.267282 | -0.269514 | 0.105559  |

---

**06 O=PPh<sub>3</sub>**

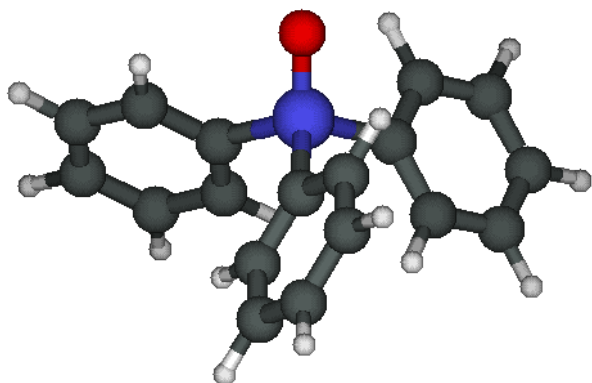

|    |    |   |           |           |           |
|----|----|---|-----------|-----------|-----------|
| 1  | 6  | 0 | 0.009325  | -0.195199 | 0.025048  |
| 2  | 6  | 0 | -0.035577 | 0.038149  | 1.397427  |
| 3  | 6  | 0 | 1.148829  | 0.253594  | 2.092897  |
| 4  | 6  | 0 | 2.362153  | 0.238584  | 1.423958  |
| 5  | 6  | 0 | 2.398841  | 0.007919  | 0.058902  |
| 6  | 6  | 0 | 1.221645  | -0.209732 | -0.640973 |
| 7  | 15 | 0 | -1.658757 | 0.016868  | 2.193721  |
| 8  | 6  | 0 | -2.017206 | -1.720010 | 2.541124  |
| 9  | 6  | 0 | -1.028783 | -2.693925 | 2.629590  |
| 10 | 6  | 0 | -1.367047 | -4.004571 | 2.924061  |

|    |   |   |           |           |           |
|----|---|---|-----------|-----------|-----------|
| 11 | 6 | 0 | -2.692722 | -4.348796 | 3.131310  |
| 12 | 6 | 0 | -3.683309 | -3.382647 | 3.045308  |
| 13 | 6 | 0 | -3.347367 | -2.072746 | 2.752212  |
| 14 | 6 | 0 | -1.432130 | 0.811527  | 3.801306  |
| 15 | 6 | 0 | -1.176999 | 0.103102  | 4.969890  |
| 16 | 6 | 0 | -0.992585 | 0.776898  | 6.166524  |
| 17 | 6 | 0 | -1.060777 | 2.159702  | 6.201616  |
| 18 | 6 | 0 | -1.312801 | 2.872861  | 5.039341  |
| 19 | 6 | 0 | -1.497354 | 2.202040  | 3.843734  |
| 20 | 1 | 0 | -1.122183 | -0.980539 | 4.951046  |
| 21 | 1 | 0 | -0.797153 | 0.218554  | 7.074873  |
| 22 | 1 | 0 | -0.918284 | 2.685241  | 7.139120  |
| 23 | 1 | 0 | -1.367058 | 3.955206  | 5.066093  |
| 24 | 1 | 0 | -1.698171 | 2.758430  | 2.933620  |
| 25 | 1 | 0 | 0.011905  | -2.431453 | 2.467923  |
| 26 | 1 | 0 | -0.592145 | -4.759827 | 2.989041  |
| 27 | 1 | 0 | -2.956151 | -5.375600 | 3.358688  |
| 28 | 1 | 0 | -4.721140 | -3.651676 | 3.205498  |
| 29 | 1 | 0 | -4.121306 | -1.315444 | 2.679148  |
| 30 | 1 | 0 | 1.129001  | 0.435588  | 3.162611  |
| 31 | 1 | 0 | 3.281646  | 0.410986  | 1.971553  |
| 32 | 1 | 0 | 3.348701  | -0.000995 | -0.463638 |
| 33 | 1 | 0 | 1.249279  | -0.389938 | -1.709550 |
| 34 | 1 | 0 | -0.913285 | -0.361232 | -0.522220 |
| 35 | 8 | 0 | -2.710668 | 0.666059  | 1.374385  |

---

**07 C<sub>6</sub>H<sub>5</sub>Br, II**

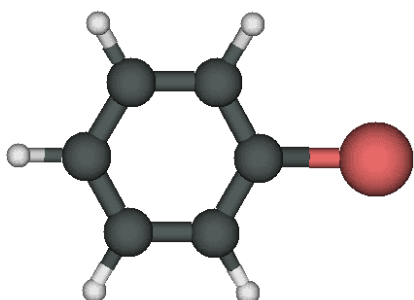

|    |    |   |           |           |           |
|----|----|---|-----------|-----------|-----------|
| 1  | 6  | 0 | 0.010523  | -0.000000 | 0.005918  |
| 2  | 6  | 0 | 0.007540  | 0.000000  | 1.389535  |
| 3  | 6  | 0 | 1.219394  | 0.000000  | 2.061560  |
| 4  | 6  | 0 | 2.412024  | -0.000000 | 1.356316  |
| 5  | 6  | 0 | 2.395016  | -0.000000 | -0.029125 |
| 6  | 6  | 0 | 1.191209  | -0.000000 | -0.715460 |
| 7  | 1  | 0 | -0.927251 | 0.000000  | 1.937460  |
| 8  | 1  | 0 | 1.226097  | 0.000000  | 3.145709  |
| 9  | 1  | 0 | 3.356812  | -0.000000 | 1.887584  |
| 10 | 1  | 0 | 3.324853  | -0.000000 | -0.586643 |
| 11 | 1  | 0 | 1.173735  | -0.000000 | -1.798859 |
| 12 | 35 | 0 | -1.645228 | 0.000000  | -0.925135 |

---

08 Cpl [ (DMF)Pd(PPh<sub>3</sub>) C<sub>6</sub>H<sub>5</sub>Br]

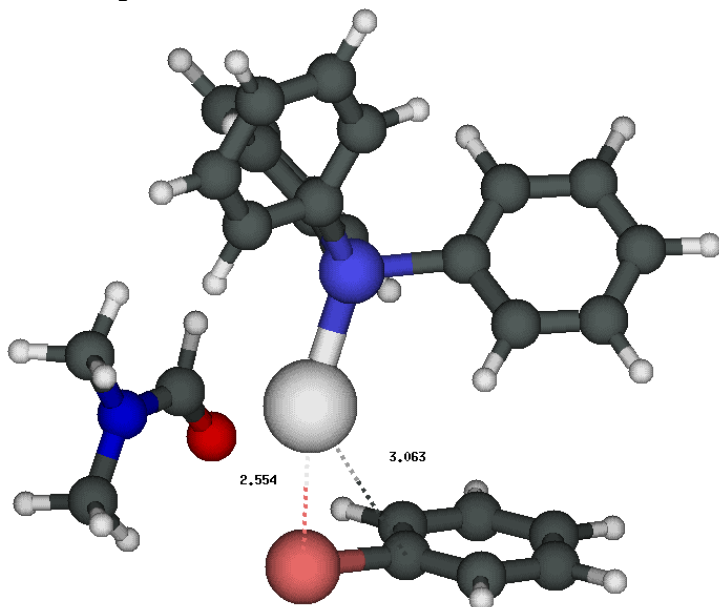


---

|    |    |   |           |           |           |
|----|----|---|-----------|-----------|-----------|
| 1  | 46 | 0 | -0.837130 | -1.056786 | 0.206719  |
| 2  | 15 | 0 | -0.343923 | -0.311761 | 2.262810  |
| 3  | 8  | 0 | 2.443188  | -0.692758 | -1.719406 |
| 4  | 6  | 0 | -1.417703 | 0.955893  | 3.028050  |
| 5  | 6  | 0 | -1.491235 | 1.173650  | 4.400773  |
| 6  | 6  | 0 | -2.290727 | 2.183796  | 4.907845  |
| 7  | 6  | 0 | -3.019164 | 2.993515  | 4.049780  |
| 8  | 6  | 0 | -2.952044 | 2.785678  | 2.682212  |
| 9  | 6  | 0 | -2.160705 | 1.767257  | 2.176291  |
| 10 | 1  | 0 | -0.922712 | 0.551928  | 5.084336  |
| 11 | 1  | 0 | -2.344238 | 2.340901  | 5.979351  |
| 12 | 1  | 0 | -3.643987 | 3.784259  | 4.449588  |
| 13 | 1  | 0 | -3.523413 | 3.412236  | 2.006619  |
| 14 | 1  | 0 | -2.116329 | 1.588413  | 1.104710  |
| 15 | 6  | 0 | -0.260301 | -1.659283 | 3.501972  |
| 16 | 6  | 0 | 0.524661  | -1.591559 | 4.651133  |
| 17 | 6  | 0 | 0.554294  | -2.648657 | 5.544644  |
| 18 | 6  | 0 | -0.197040 | -3.788355 | 5.301356  |
| 19 | 6  | 0 | -0.978032 | -3.868513 | 4.160575  |
| 20 | 6  | 0 | -1.005605 | -2.811000 | 3.266066  |
| 21 | 1  | 0 | 1.127710  | -0.710414 | 4.846969  |
| 22 | 1  | 0 | 1.171946  | -2.584566 | 6.433492  |
| 23 | 1  | 0 | -0.166555 | -4.617704 | 5.999098  |
| 24 | 1  | 0 | -1.559711 | -4.761006 | 3.957517  |
| 25 | 1  | 0 | -1.603548 | -2.876080 | 2.359833  |
| 26 | 6  | 0 | 1.324585  | 0.431991  | 2.381981  |
| 27 | 6  | 0 | 1.537509  | 1.785587  | 2.613335  |
| 28 | 6  | 0 | 2.821331  | 2.312538  | 2.571147  |
| 29 | 6  | 0 | 3.904165  | 1.492449  | 2.308139  |
| 30 | 6  | 0 | 3.701129  | 0.137836  | 2.080244  |
| 31 | 6  | 0 | 2.422255  | -0.384572 | 2.106741  |
| 32 | 1  | 0 | 0.700046  | 2.443170  | 2.823769  |
| 33 | 1  | 0 | 2.971714  | 3.371269  | 2.750980  |
| 34 | 1  | 0 | 4.906282  | 1.904893  | 2.278921  |
| 35 | 1  | 0 | 4.543799  | -0.511450 | 1.869926  |
| 36 | 1  | 0 | 2.269642  | -1.441143 | 1.898999  |
| 37 | 6  | 0 | 1.806879  | 0.266983  | -1.323414 |
| 38 | 7  | 0 | 0.858636  | 0.927401  | -2.011240 |

|    |    |   |           |           |           |
|----|----|---|-----------|-----------|-----------|
| 39 | 1  | 0 | 1.977760  | 0.721681  | -0.327974 |
| 40 | 6  | 0 | 0.161915  | 2.052505  | -1.444285 |
| 41 | 6  | 0 | 0.458372  | 0.520704  | -3.332953 |
| 42 | 1  | 0 | 0.297736  | 2.944158  | -2.064605 |
| 43 | 1  | 0 | -0.911418 | 1.842389  | -1.374900 |
| 44 | 1  | 0 | 0.541992  | 2.260217  | -0.442427 |
| 45 | 1  | 0 | 0.697492  | 1.297664  | -4.066056 |
| 46 | 1  | 0 | 0.973534  | -0.399009 | -3.603805 |
| 47 | 1  | 0 | -0.622994 | 0.351039  | -3.362382 |
| 48 | 6  | 0 | -0.280900 | -3.856215 | -0.904293 |
| 49 | 6  | 0 | 1.093810  | -3.749084 | -0.800751 |
| 50 | 6  | 0 | 1.770294  | -4.715671 | -0.073696 |
| 51 | 6  | 0 | 1.079576  | -5.757185 | 0.527050  |
| 52 | 6  | 0 | -0.297052 | -5.841521 | 0.400913  |
| 53 | 6  | 0 | -0.994068 | -4.884827 | -0.321518 |
| 54 | 1  | 0 | 1.620933  | -2.915953 | -1.255336 |
| 55 | 1  | 0 | 2.847552  | -4.646621 | 0.025545  |
| 56 | 1  | 0 | 1.617535  | -6.506076 | 1.096368  |
| 57 | 1  | 0 | -0.840697 | -6.654563 | 0.868161  |
| 58 | 1  | 0 | -2.071974 | -4.938002 | -0.416851 |
| 59 | 35 | 0 | -1.242362 | -2.496177 | -1.863545 |

---

**09 (DMF)<sub>2</sub>**

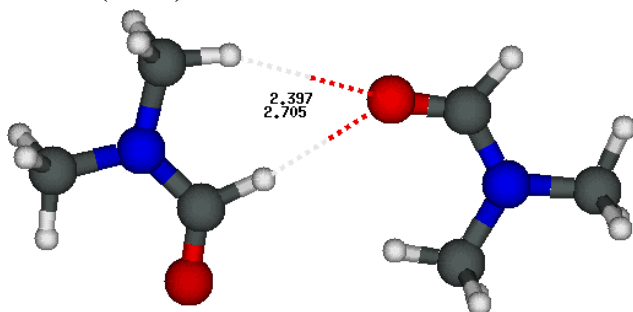

|    |   |   |           |           |           |
|----|---|---|-----------|-----------|-----------|
| 1  | 6 | 0 | 0.044199  | 0.164240  | -0.127703 |
| 2  | 8 | 0 | 0.115686  | 0.278652  | 1.082085  |
| 3  | 1 | 0 | 0.941463  | 0.183387  | -0.775948 |
| 4  | 7 | 0 | -1.080035 | 0.003791  | -0.843540 |
| 5  | 6 | 0 | -1.051844 | -0.122640 | -2.278268 |
| 6  | 6 | 0 | -2.377752 | -0.049309 | -0.218410 |
| 7  | 1 | 0 | -1.628585 | 0.680282  | -2.747362 |
| 8  | 1 | 0 | -0.023275 | -0.069971 | -2.635462 |
| 9  | 1 | 0 | -1.483350 | -1.078994 | -2.588985 |
| 10 | 1 | 0 | -3.013519 | 0.758600  | -0.592691 |
| 11 | 1 | 0 | -2.868402 | -1.001272 | -0.441854 |
| 12 | 1 | 0 | -2.269845 | 0.052009  | 0.859612  |
| 13 | 6 | 0 | -1.841973 | 0.435388  | 3.976057  |
| 14 | 8 | 0 | -3.055644 | 0.467814  | 4.061340  |
| 15 | 7 | 0 | -0.978545 | 0.466393  | 5.007841  |
| 16 | 6 | 0 | 0.445734  | 0.421196  | 4.798162  |
| 17 | 6 | 0 | -1.431158 | 0.542959  | 6.372837  |
| 18 | 1 | 0 | 0.660758  | 0.363755  | 3.730446  |
| 19 | 1 | 0 | 0.925183  | 1.316552  | 5.206452  |
| 20 | 1 | 0 | 0.881733  | -0.452432 | 5.293098  |
| 21 | 1 | 0 | -2.518842 | 0.573403  | 6.392002  |
| 22 | 1 | 0 | -1.085908 | -0.327034 | 6.940010  |
| 23 | 1 | 0 | -1.037724 | 1.442386  | 6.856445  |
| 24 | 1 | 0 | -1.312339 | 0.374802  | 3.004906  |

10 TSA

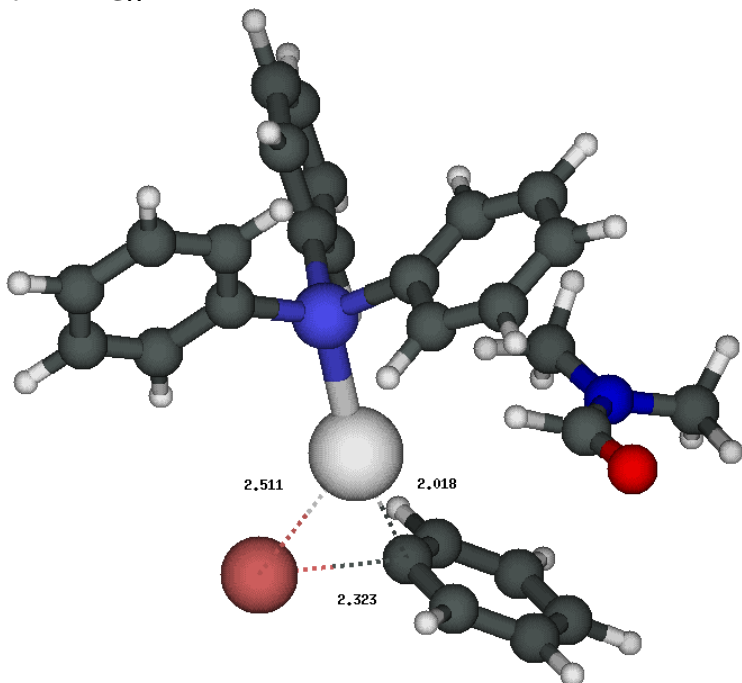

|    |    |   |           |           |           |
|----|----|---|-----------|-----------|-----------|
| 1  | 46 | 0 | -0.155863 | -0.884979 | -0.003859 |
| 2  | 15 | 0 | -0.199654 | -0.450149 | 2.334432  |
| 3  | 8  | 0 | 4.334678  | -0.167720 | -0.532124 |
| 4  | 6  | 0 | -1.092195 | 1.080084  | 2.776049  |
| 5  | 6  | 0 | -1.358553 | 1.436992  | 4.095557  |
| 6  | 6  | 0 | -2.025407 | 2.615157  | 4.379557  |
| 7  | 6  | 0 | -2.433181 | 3.449580  | 3.348782  |
| 8  | 6  | 0 | -2.175508 | 3.102170  | 2.033707  |
| 9  | 6  | 0 | -1.509943 | 1.919997  | 1.749383  |
| 10 | 1  | 0 | -1.040178 | 0.791667  | 4.908656  |
| 11 | 1  | 0 | -2.229043 | 2.884634  | 5.409764  |
| 12 | 1  | 0 | -2.957517 | 4.371502  | 3.573852  |
| 13 | 1  | 0 | -2.497867 | 3.748713  | 1.225455  |
| 14 | 1  | 0 | -1.313445 | 1.635331  | 0.717513  |
| 15 | 6  | 0 | -0.926193 | -1.696794 | 3.453879  |
| 16 | 6  | 0 | -0.471722 | -1.936833 | 4.747159  |
| 17 | 6  | 0 | -1.104400 | -2.874494 | 5.546434  |
| 18 | 6  | 0 | -2.198529 | -3.576095 | 5.065480  |
| 19 | 6  | 0 | -2.657711 | -3.342789 | 3.779241  |
| 20 | 6  | 0 | -2.019628 | -2.413206 | 2.975938  |
| 21 | 1  | 0 | 0.382542  | -1.391985 | 5.135634  |
| 22 | 1  | 0 | -0.740580 | -3.056737 | 6.551446  |
| 23 | 1  | 0 | -2.690651 | -4.310308 | 5.693307  |
| 24 | 1  | 0 | -3.509460 | -3.893340 | 3.396099  |
| 25 | 1  | 0 | -2.367600 | -2.241645 | 1.960560  |
| 26 | 6  | 0 | 1.489059  | -0.197147 | 2.975895  |
| 27 | 6  | 0 | 1.984135  | 1.050180  | 3.335984  |
| 28 | 6  | 0 | 3.320429  | 1.201624  | 3.679252  |
| 29 | 6  | 0 | 4.169772  | 0.109368  | 3.675342  |
| 30 | 6  | 0 | 3.682852  | -1.140544 | 3.318329  |
| 31 | 6  | 0 | 2.356639  | -1.289861 | 2.959626  |
| 32 | 1  | 0 | 1.330779  | 1.916525  | 3.344770  |
| 33 | 1  | 0 | 3.694641  | 2.181106  | 3.955460  |

|    |    |   |           |           |           |
|----|----|---|-----------|-----------|-----------|
| 34 | 1  | 0 | 5.212375  | 0.229307  | 3.946945  |
| 35 | 1  | 0 | 4.343704  | -2.000011 | 3.308636  |
| 36 | 1  | 0 | 1.987584  | -2.266495 | 2.656909  |
| 37 | 6  | 0 | 3.283442  | 0.384185  | -0.274744 |
| 38 | 7  | 0 | 2.939285  | 1.636486  | -0.632637 |
| 39 | 1  | 0 | 2.469324  | -0.113585 | 0.296885  |
| 40 | 6  | 0 | 1.702026  | 2.233253  | -0.202388 |
| 41 | 6  | 0 | 3.828952  | 2.469264  | -1.402473 |
| 42 | 1  | 0 | 1.886586  | 3.083427  | 0.463898  |
| 43 | 1  | 0 | 1.123901  | 2.589198  | -1.062261 |
| 44 | 1  | 0 | 1.102701  | 1.488592  | 0.327625  |
| 45 | 1  | 0 | 4.185118  | 3.314952  | -0.805418 |
| 46 | 1  | 0 | 4.683370  | 1.879996  | -1.730336 |
| 47 | 1  | 0 | 3.306667  | 2.865642  | -2.278434 |
| 48 | 6  | 0 | 0.203479  | -0.975758 | -1.987942 |
| 49 | 6  | 0 | -0.069994 | 0.234064  | -2.614657 |
| 50 | 6  | 0 | 0.865740  | 0.743682  | -3.502465 |
| 51 | 6  | 0 | 2.021669  | 0.031510  | -3.790795 |
| 52 | 6  | 0 | 2.247204  | -1.201075 | -3.195196 |
| 53 | 6  | 0 | 1.328517  | -1.728028 | -2.300407 |
| 54 | 1  | 0 | -0.985338 | 0.774595  | -2.398562 |
| 55 | 1  | 0 | 0.683984  | 1.703309  | -3.974985 |
| 56 | 1  | 0 | 2.742114  | 0.432244  | -4.494728 |
| 57 | 1  | 0 | 3.146889  | -1.761032 | -3.425509 |
| 58 | 1  | 0 | 1.491412  | -2.696338 | -1.840673 |
| 59 | 35 | 0 | -1.673111 | -2.244153 | -1.472237 |

---

**11** *trans*-[Ph-Pd-Br (DMF)(Ph<sub>3</sub>P)], III

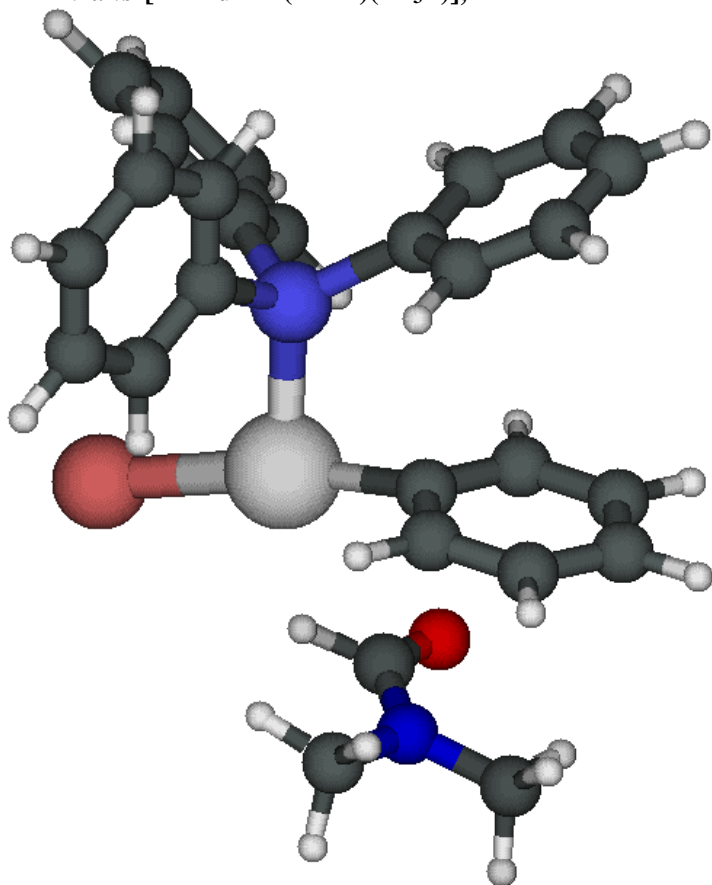


---

|   |    |   |           |           |          |
|---|----|---|-----------|-----------|----------|
| 1 | 46 | 0 | -0.100581 | -0.029681 | 0.094516 |
|---|----|---|-----------|-----------|----------|



|    |    |   |           |           |           |
|----|----|---|-----------|-----------|-----------|
| 2  | 15 | 0 | -0.036020 | -0.033664 | 2.334898  |
| 3  | 8  | 0 | 2.489768  | -0.079530 | -2.768162 |
| 4  | 6  | 0 | -1.684006 | -0.320662 | 3.029395  |
| 5  | 6  | 0 | -1.846478 | -0.509744 | 4.401540  |
| 6  | 6  | 0 | -3.108258 | -0.713795 | 4.928002  |
| 7  | 6  | 0 | -4.214566 | -0.739092 | 4.091688  |
| 8  | 6  | 0 | -4.058661 | -0.558269 | 2.728374  |
| 9  | 6  | 0 | -2.796567 | -0.349360 | 2.196702  |
| 10 | 1  | 0 | -0.983982 | -0.496836 | 5.060306  |
| 11 | 1  | 0 | -3.228554 | -0.857346 | 5.995546  |
| 12 | 1  | 0 | -5.202229 | -0.904583 | 4.506932  |
| 13 | 1  | 0 | -4.921189 | -0.582696 | 2.072539  |
| 14 | 1  | 0 | -2.668715 | -0.204850 | 1.127832  |
| 15 | 6  | 0 | 1.039304  | -1.198544 | 3.222632  |
| 16 | 6  | 0 | 2.292625  | -0.826141 | 3.692129  |
| 17 | 6  | 0 | 3.122457  | -1.765375 | 4.286092  |
| 18 | 6  | 0 | 2.706968  | -3.078072 | 4.416769  |
| 19 | 6  | 0 | 1.452394  | -3.454302 | 3.957219  |
| 20 | 6  | 0 | 0.624837  | -2.522959 | 3.361351  |
| 21 | 1  | 0 | 2.633602  | 0.198501  | 3.599691  |
| 22 | 1  | 0 | 4.097625  | -1.462736 | 4.649878  |
| 23 | 1  | 0 | 3.357389  | -3.810899 | 4.880396  |
| 24 | 1  | 0 | 1.118465  | -4.480416 | 4.061155  |
| 25 | 1  | 0 | -0.349029 | -2.830581 | 2.994527  |
| 26 | 6  | 0 | 0.510896  | 1.621220  | 2.840070  |
| 27 | 6  | 0 | -0.166476 | 2.374074  | 3.790578  |
| 28 | 6  | 0 | 0.286042  | 3.642529  | 4.119930  |
| 29 | 6  | 0 | 1.415057  | 4.160441  | 3.509811  |
| 30 | 6  | 0 | 2.094188  | 3.412133  | 2.559549  |
| 31 | 6  | 0 | 1.638281  | 2.153426  | 2.218125  |
| 32 | 1  | 0 | -1.055697 | 1.984222  | 4.272453  |
| 33 | 1  | 0 | -0.251879 | 4.227439  | 4.857179  |
| 34 | 1  | 0 | 1.764455  | 5.153388  | 3.768968  |
| 35 | 1  | 0 | 2.974091  | 3.816844  | 2.073021  |
| 36 | 1  | 0 | 2.151931  | 1.580014  | 1.450882  |
| 37 | 6  | 0 | 1.313573  | -0.374488 | -2.735279 |
| 38 | 7  | 0 | 0.753236  | -1.497577 | -3.213045 |
| 39 | 1  | 0 | 0.546214  | 0.304425  | -2.286973 |
| 40 | 6  | 0 | -0.670743 | -1.710396 | -3.201357 |
| 41 | 6  | 0 | 1.556436  | -2.547017 | -3.789732 |
| 42 | 1  | 0 | -1.056172 | -1.793536 | -4.222323 |
| 43 | 1  | 0 | -0.915755 | -2.632058 | -2.664147 |
| 44 | 1  | 0 | -1.172959 | -0.876026 | -2.707362 |
| 45 | 1  | 0 | 1.323266  | -2.676333 | -4.851121 |
| 46 | 1  | 0 | 2.610444  | -2.297355 | -3.684048 |
| 47 | 1  | 0 | 1.354660  | -3.492657 | -3.276457 |
| 48 | 6  | 0 | 0.686545  | -1.864806 | 0.194679  |
| 49 | 6  | 0 | -0.170522 | -2.942724 | 0.017440  |
| 50 | 6  | 0 | 0.347199  | -4.220373 | -0.161878 |
| 51 | 6  | 0 | 1.717925  | -4.424155 | -0.146378 |
| 52 | 6  | 0 | 2.572765  | -3.348461 | 0.051189  |
| 53 | 6  | 0 | 2.059376  | -2.072257 | 0.234180  |
| 54 | 1  | 0 | -1.247702 | -2.795265 | 0.015577  |
| 55 | 1  | 0 | -0.327168 | -5.058077 | -0.306786 |
| 56 | 1  | 0 | 2.121344  | -5.421743 | -0.279755 |
| 57 | 1  | 0 | 3.646641  | -3.503559 | 0.068275  |
| 58 | 1  | 0 | 2.737433  | -1.240023 | 0.403269  |
| 59 | 35 | 0 | -1.235836 | 2.178637  | -0.444425 |

---

12 *trans*-(DMF)<sub>2</sub>Pd<sup>0</sup>(PPh<sub>3</sub>)<sub>2</sub>, I'

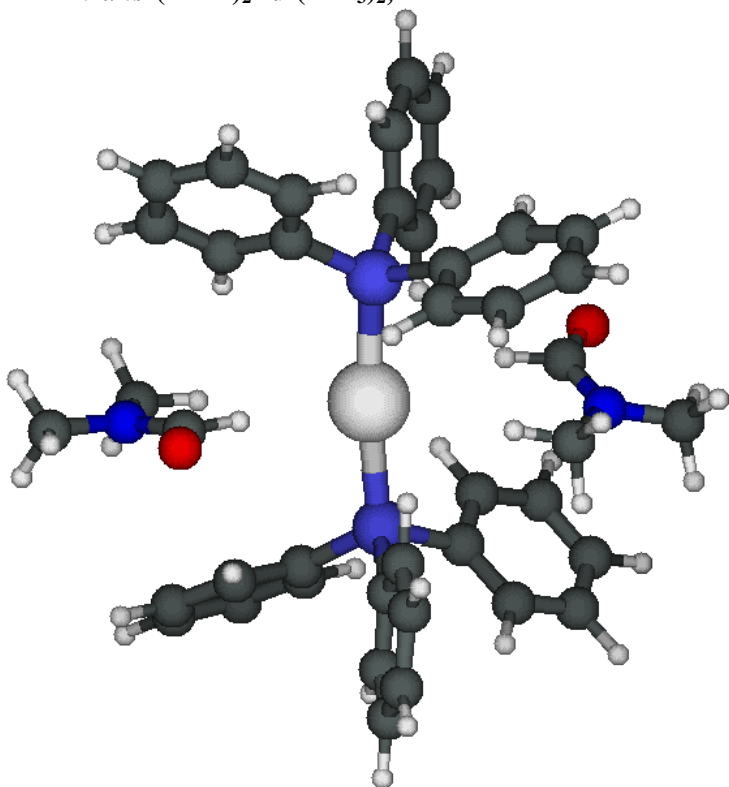


---

|    |    |   |           |           |           |
|----|----|---|-----------|-----------|-----------|
| 1  | 46 | 0 | -0.271938 | 0.198894  | -0.123203 |
| 2  | 15 | 0 | -0.183117 | 0.178682  | 2.193487  |
| 3  | 15 | 0 | 0.070418  | 0.291283  | -2.414952 |
| 4  | 6  | 0 | -1.307288 | -0.942671 | 3.103253  |
| 5  | 6  | 0 | -0.901979 | -1.854395 | 4.071416  |
| 6  | 6  | 0 | -1.829261 | -2.681545 | 4.686805  |
| 7  | 6  | 0 | -3.170930 | -2.596454 | 4.353391  |
| 8  | 6  | 0 | -3.586777 | -1.674791 | 3.404182  |
| 9  | 6  | 0 | -2.659531 | -0.861682 | 2.777831  |
| 10 | 1  | 0 | 0.143639  | -1.926481 | 4.350576  |
| 11 | 1  | 0 | -1.498964 | -3.393497 | 5.434960  |
| 12 | 1  | 0 | -3.893803 | -3.244941 | 4.835420  |
| 13 | 1  | 0 | -4.636781 | -1.596184 | 3.143144  |
| 14 | 1  | 0 | -2.987296 | -0.151954 | 2.022008  |
| 15 | 6  | 0 | 1.491414  | -0.341842 | 2.707188  |
| 16 | 6  | 0 | 2.392737  | 0.511128  | 3.333104  |
| 17 | 6  | 0 | 3.693534  | 0.096454  | 3.585970  |
| 18 | 6  | 0 | 4.101915  | -1.176593 | 3.229928  |
| 19 | 6  | 0 | 3.207794  | -2.036677 | 2.606136  |
| 20 | 6  | 0 | 1.919618  | -1.617361 | 2.334191  |
| 21 | 1  | 0 | 2.089320  | 1.512265  | 3.621797  |
| 22 | 1  | 0 | 4.387057  | 0.775574  | 4.069576  |
| 23 | 1  | 0 | 5.116329  | -1.500385 | 3.433464  |
| 24 | 1  | 0 | 3.521031  | -3.034568 | 2.320136  |
| 25 | 1  | 0 | 1.231904  | -2.287513 | 1.823783  |
| 26 | 6  | 0 | -0.439709 | 1.767781  | 3.055104  |
| 27 | 6  | 0 | -0.609178 | 1.843903  | 4.435612  |
| 28 | 6  | 0 | -0.782172 | 3.070372  | 5.051456  |
| 29 | 6  | 0 | -0.784599 | 4.233948  | 4.295152  |
| 30 | 6  | 0 | -0.615774 | 4.168013  | 2.922752  |
| 31 | 6  | 0 | -0.447978 | 2.938252  | 2.305282  |

|    |   |   |           |           |           |
|----|---|---|-----------|-----------|-----------|
| 32 | 1 | 0 | -0.601804 | 0.937082  | 5.033527  |
| 33 | 1 | 0 | -0.915232 | 3.120718  | 6.126319  |
| 34 | 1 | 0 | -0.921679 | 5.194120  | 4.779791  |
| 35 | 1 | 0 | -0.618751 | 5.074817  | 2.328526  |
| 36 | 1 | 0 | -0.321652 | 2.876906  | 1.226420  |
| 37 | 6 | 0 | 1.247909  | 1.629422  | -2.818549 |
| 38 | 6 | 0 | 2.462621  | 1.424708  | -3.461455 |
| 39 | 6 | 0 | 3.358354  | 2.472998  | -3.620632 |
| 40 | 6 | 0 | 3.042597  | 3.738071  | -3.156776 |
| 41 | 6 | 0 | 1.824895  | 3.955973  | -2.527594 |
| 42 | 6 | 0 | 0.943258  | 2.907262  | -2.346877 |
| 43 | 1 | 0 | 2.728055  | 0.439684  | -3.829900 |
| 44 | 1 | 0 | 4.308537  | 2.295013  | -4.112258 |
| 45 | 1 | 0 | 3.744401  | 4.555007  | -3.281779 |
| 46 | 1 | 0 | 1.571428  | 4.942994  | -2.157577 |
| 47 | 1 | 0 | 0.005097  | 3.074990  | -1.822791 |
| 48 | 6 | 0 | 0.817165  | -1.219066 | -3.123044 |
| 49 | 6 | 0 | 0.915548  | -1.425519 | -4.497343 |
| 50 | 6 | 0 | 1.487007  | -2.584262 | -4.991702 |
| 51 | 6 | 0 | 1.964225  | -3.551463 | -4.118682 |
| 52 | 6 | 0 | 1.868219  | -3.357602 | -2.751239 |
| 53 | 6 | 0 | 1.294057  | -2.196896 | -2.256305 |
| 54 | 1 | 0 | 0.544225  | -0.672054 | -5.186207 |
| 55 | 1 | 0 | 1.559319  | -2.735964 | -6.062824 |
| 56 | 1 | 0 | 2.407949  | -4.460736 | -4.508374 |
| 57 | 1 | 0 | 2.234163  | -4.113797 | -2.065914 |
| 58 | 1 | 0 | 1.203472  | -2.041405 | -1.182880 |
| 59 | 6 | 0 | -1.334265 | 0.566532  | -3.556248 |
| 60 | 6 | 0 | -1.420065 | 1.621416  | -4.455819 |
| 61 | 6 | 0 | -2.531940 | 1.754343  | -5.275277 |
| 62 | 6 | 0 | -3.562369 | 0.833022  | -5.209297 |
| 63 | 6 | 0 | -3.480665 | -0.228500 | -4.319059 |
| 64 | 6 | 0 | -2.377608 | -0.356388 | -3.495823 |
| 65 | 1 | 0 | -0.616329 | 2.346446  | -4.526734 |
| 66 | 1 | 0 | -2.587273 | 2.583125  | -5.972352 |
| 67 | 1 | 0 | -4.429458 | 0.938751  | -5.851332 |
| 68 | 1 | 0 | -4.282258 | -0.956944 | -4.263964 |
| 69 | 1 | 0 | -2.318332 | -1.190030 | -2.799436 |
| 70 | 8 | 0 | 3.006417  | 3.589722  | 0.882537  |
| 71 | 6 | 0 | 2.856928  | 2.453722  | 0.474877  |
| 72 | 7 | 0 | 3.822507  | 1.666475  | -0.037844 |
| 73 | 1 | 0 | 1.872167  | 1.935891  | 0.482926  |
| 74 | 6 | 0 | 3.569401  | 0.288757  | -0.377401 |
| 75 | 6 | 0 | 5.188545  | 2.115985  | -0.127275 |
| 76 | 1 | 0 | 3.883437  | 0.082985  | -1.405870 |
| 77 | 1 | 0 | 4.121381  | -0.384049 | 0.289408  |
| 78 | 1 | 0 | 2.498514  | 0.077470  | -0.285975 |
| 79 | 1 | 0 | 5.584446  | 1.915413  | -1.126929 |
| 80 | 1 | 0 | 5.232938  | 3.185831  | 0.068637  |
| 81 | 1 | 0 | 5.819660  | 1.593564  | 0.600588  |
| 82 | 8 | 0 | -1.539304 | -3.925279 | 0.581142  |
| 83 | 6 | 0 | -2.072769 | -2.904881 | 0.187865  |
| 84 | 7 | 0 | -3.398401 | -2.700059 | 0.075746  |
| 85 | 6 | 0 | -3.937560 | -1.439598 | -0.365350 |
| 86 | 6 | 0 | -4.350088 | -3.708451 | 0.466112  |
| 87 | 1 | 0 | -4.591819 | -1.013940 | 0.403442  |
| 88 | 1 | 0 | -3.125097 | -0.734101 | -0.561043 |
| 89 | 1 | 0 | -4.526690 | -1.565618 | -1.279689 |
| 90 | 1 | 0 | -4.970412 | -3.347163 | 1.293570  |

|    |   |   |           |           |           |
|----|---|---|-----------|-----------|-----------|
| 91 | 1 | 0 | -5.008851 | -3.957862 | -0.371058 |
| 92 | 1 | 0 | -3.818628 | -4.603604 | 0.783876  |
| 93 | 1 | 0 | -1.488549 | -2.010222 | -0.130094 |

---

### 13 TS'A

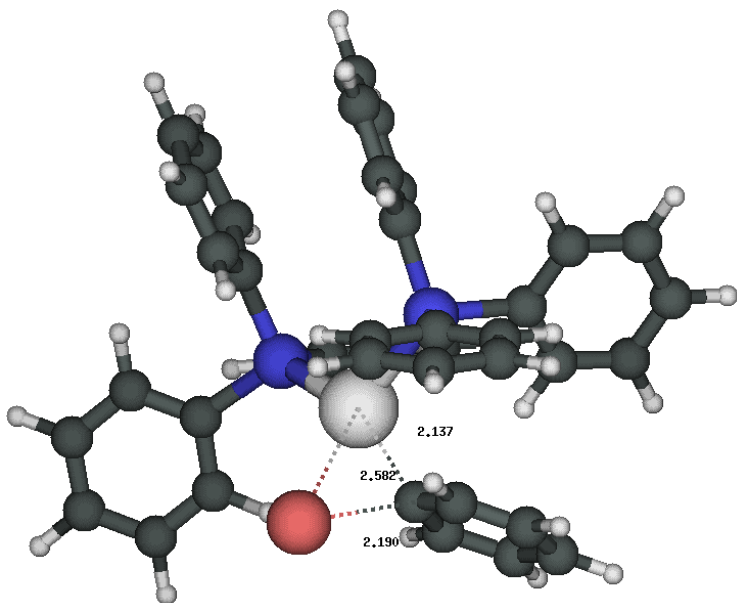


---

|    |    |   |           |           |           |
|----|----|---|-----------|-----------|-----------|
| 1  | 46 | 0 | 0.026484  | -0.022264 | 0.028347  |
| 2  | 15 | 0 | 0.009481  | 0.001242  | 2.437537  |
| 3  | 15 | 0 | 2.271634  | -0.022459 | -0.901093 |
| 4  | 6  | 0 | -1.326381 | 1.089599  | 3.041245  |
| 5  | 6  | 0 | -2.352088 | 0.668482  | 3.878920  |
| 6  | 6  | 0 | -3.401513 | 1.521797  | 4.190360  |
| 7  | 6  | 0 | -3.432516 | 2.806216  | 3.677023  |
| 8  | 6  | 0 | -2.410576 | 3.238430  | 2.842578  |
| 9  | 6  | 0 | -1.374274 | 2.382952  | 2.519211  |
| 10 | 1  | 0 | -2.351126 | -0.337976 | 4.283329  |
| 11 | 1  | 0 | -4.199134 | 1.175293  | 4.838130  |
| 12 | 1  | 0 | -4.253581 | 3.470882  | 3.920664  |
| 13 | 1  | 0 | -2.429145 | 4.242267  | 2.433266  |
| 14 | 1  | 0 | -0.593703 | 2.715390  | 1.838638  |
| 15 | 6  | 0 | -0.282112 | -1.583188 | 3.302927  |
| 16 | 6  | 0 | -0.065884 | -1.738630 | 4.671032  |
| 17 | 6  | 0 | -0.316126 | -2.952448 | 5.285696  |
| 18 | 6  | 0 | -0.786683 | -4.025980 | 4.542456  |
| 19 | 6  | 0 | -1.002449 | -3.882082 | 3.182827  |
| 20 | 6  | 0 | -0.745499 | -2.666753 | 2.566780  |
| 21 | 1  | 0 | 0.295467  | -0.901558 | 5.261413  |
| 22 | 1  | 0 | -0.145016 | -3.062664 | 6.350720  |
| 23 | 1  | 0 | -0.981726 | -4.976135 | 5.026994  |
| 24 | 1  | 0 | -1.368190 | -4.716361 | 2.593729  |
| 25 | 1  | 0 | -0.904340 | -2.556438 | 1.497932  |
| 26 | 6  | 0 | 1.497139  | 0.608296  | 3.315683  |
| 27 | 6  | 0 | 1.514912  | 1.710134  | 4.162553  |
| 28 | 6  | 0 | 2.694048  | 2.102467  | 4.780641  |
| 29 | 6  | 0 | 3.862882  | 1.392345  | 4.569486  |
| 30 | 6  | 0 | 3.853016  | 0.286108  | 3.731380  |
| 31 | 6  | 0 | 2.682681  | -0.094832 | 3.102308  |
| 32 | 1  | 0 | 0.604716  | 2.267945  | 4.353691  |
| 33 | 1  | 0 | 2.692344  | 2.964565  | 5.438500  |

|    |    |   |           |           |           |
|----|----|---|-----------|-----------|-----------|
| 34 | 1  | 0 | 4.782397  | 1.698041  | 5.056003  |
| 35 | 1  | 0 | 4.764390  | -0.276494 | 3.561025  |
| 36 | 1  | 0 | 2.685549  | -0.956704 | 2.438625  |
| 37 | 6  | 0 | 2.964699  | -1.707496 | -1.062836 |
| 38 | 6  | 0 | 3.917854  | -2.052262 | -2.018324 |
| 39 | 6  | 0 | 4.402410  | -3.347153 | -2.089946 |
| 40 | 6  | 0 | 3.942619  | -4.312966 | -1.207664 |
| 41 | 6  | 0 | 2.993992  | -3.981493 | -0.254415 |
| 42 | 6  | 0 | 2.504686  | -2.687178 | -0.187068 |
| 43 | 1  | 0 | 4.285568  | -1.303297 | -2.713252 |
| 44 | 1  | 0 | 5.142683  | -3.603950 | -2.839391 |
| 45 | 1  | 0 | 4.321075  | -5.327149 | -1.268199 |
| 46 | 1  | 0 | 2.625291  | -4.734186 | 0.433516  |
| 47 | 1  | 0 | 1.746482  | -2.428478 | 0.548173  |
| 48 | 6  | 0 | 2.406763  | 0.615109  | -2.610659 |
| 49 | 6  | 0 | 3.279386  | 1.624620  | -3.000053 |
| 50 | 6  | 0 | 3.300852  | 2.065352  | -4.315748 |
| 51 | 6  | 0 | 2.458850  | 1.497660  | -5.255696 |
| 52 | 6  | 0 | 1.584333  | 0.489108  | -4.876034 |
| 53 | 6  | 0 | 1.552032  | 0.060381  | -3.562453 |
| 54 | 1  | 0 | 3.954432  | 2.073372  | -2.278784 |
| 55 | 1  | 0 | 3.986135  | 2.854375  | -4.605124 |
| 56 | 1  | 0 | 2.479350  | 1.841431  | -6.283685 |
| 57 | 1  | 0 | 0.919191  | 0.041719  | -5.606239 |
| 58 | 1  | 0 | 0.854729  | -0.719039 | -3.265750 |
| 59 | 6  | 0 | 3.565632  | 0.922214  | -0.024190 |
| 60 | 6  | 0 | 4.884847  | 0.503742  | 0.105889  |
| 61 | 6  | 0 | 5.807046  | 1.293529  | 0.775808  |
| 62 | 6  | 0 | 5.422108  | 2.509838  | 1.315180  |
| 63 | 6  | 0 | 4.108610  | 2.936601  | 1.187702  |
| 64 | 6  | 0 | 3.186114  | 2.143501  | 0.528488  |
| 65 | 1  | 0 | 5.201863  | -0.445392 | -0.313263 |
| 66 | 1  | 0 | 6.832348  | 0.954848  | 0.875299  |
| 67 | 1  | 0 | 6.144548  | 3.124595  | 1.840374  |
| 68 | 1  | 0 | 3.800209  | 3.885901  | 1.611454  |
| 69 | 1  | 0 | 2.152827  | 2.472011  | 0.439762  |
| 70 | 6  | 0 | -2.014370 | -0.562202 | -0.305334 |
| 71 | 6  | 0 | -1.882115 | -1.812099 | -0.915182 |
| 72 | 6  | 0 | -2.705337 | -2.857113 | -0.512315 |
| 73 | 6  | 0 | -3.691697 | -2.650798 | 0.436404  |
| 74 | 6  | 0 | -3.865310 | -1.378670 | 0.978135  |
| 75 | 6  | 0 | -3.054001 | -0.329599 | 0.596744  |
| 76 | 1  | 0 | -1.147343 | -1.965065 | -1.699402 |
| 77 | 1  | 0 | -2.580259 | -3.834143 | -0.967347 |
| 78 | 1  | 0 | -4.342522 | -3.464239 | 0.735280  |
| 79 | 1  | 0 | -4.645744 | -1.201396 | 1.711719  |
| 80 | 1  | 0 | -3.200528 | 0.660311  | 1.015843  |
| 81 | 35 | 0 | -1.576917 | 1.110129  | -1.649746 |

---

14 *trans*-[Ph-Pd-Br (Ph<sub>3</sub>P)<sub>2</sub>], III'

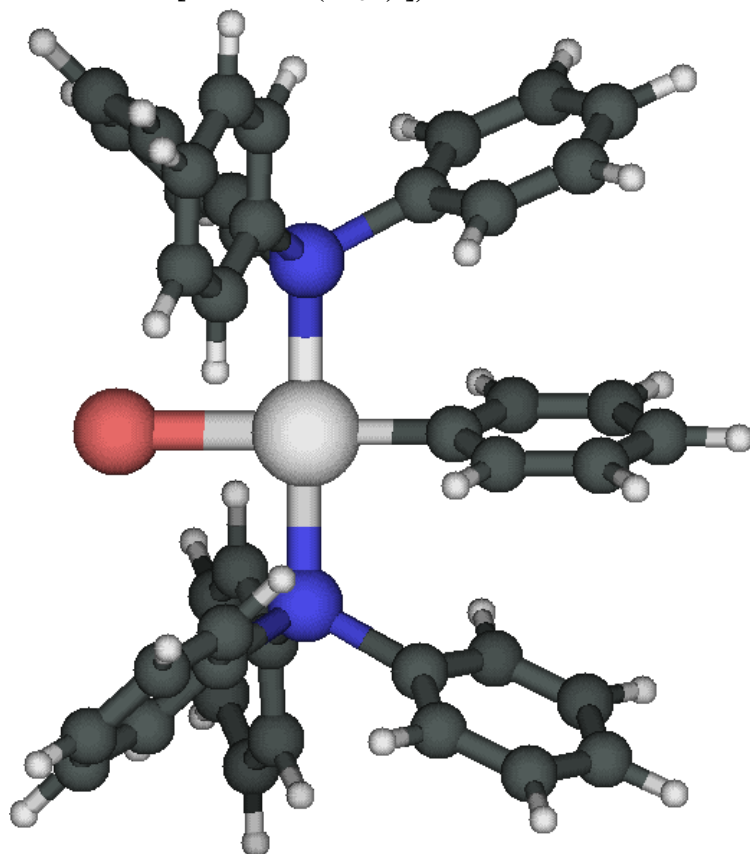


---

|    |    |   |           |           |           |
|----|----|---|-----------|-----------|-----------|
| 1  | 46 | 0 | -0.001630 | -0.125269 | -0.006004 |
| 2  | 15 | 0 | -2.362881 | -0.123603 | -0.022237 |
| 3  | 15 | 0 | 2.360358  | -0.122577 | 0.014296  |
| 4  | 6  | 0 | -2.970287 | -1.243534 | -1.319473 |
| 5  | 6  | 0 | -3.913844 | -2.237480 | -1.100230 |
| 6  | 6  | 0 | -4.289321 | -3.082564 | -2.133820 |
| 7  | 6  | 0 | -3.731029 | -2.937018 | -3.391822 |
| 8  | 6  | 0 | -2.786425 | -1.946414 | -3.617683 |
| 9  | 6  | 0 | -2.401525 | -1.112256 | -2.584853 |
| 10 | 1  | 0 | -4.353027 | -2.371109 | -0.118149 |
| 11 | 1  | 0 | -5.021553 | -3.860724 | -1.950276 |
| 12 | 1  | 0 | -4.026221 | -3.599498 | -4.197617 |
| 13 | 1  | 0 | -2.340163 | -1.831552 | -4.598985 |
| 14 | 1  | 0 | -1.641771 | -0.353658 | -2.757054 |
| 15 | 6  | 0 | -3.087031 | -0.660904 | 1.557346  |
| 16 | 6  | 0 | -4.460871 | -0.585268 | 1.783073  |
| 17 | 6  | 0 | -4.988864 | -0.964550 | 3.003439  |
| 18 | 6  | 0 | -4.150285 | -1.411351 | 4.014343  |
| 19 | 6  | 0 | -2.784270 | -1.478431 | 3.802136  |
| 20 | 6  | 0 | -2.253564 | -1.104620 | 2.577512  |
| 21 | 1  | 0 | -5.120950 | -0.222332 | 1.001033  |
| 22 | 1  | 0 | -6.058557 | -0.906257 | 3.169261  |
| 23 | 1  | 0 | -4.565633 | -1.702934 | 4.972441  |
| 24 | 1  | 0 | -2.125873 | -1.820255 | 4.592631  |
| 25 | 1  | 0 | -1.183023 | -1.162004 | 2.404522  |
| 26 | 6  | 0 | -3.229260 | 1.453092  | -0.330815 |
| 27 | 6  | 0 | -3.831692 | 1.761853  | -1.543842 |
| 28 | 6  | 0 | -4.393413 | 3.013875  | -1.749337 |
| 29 | 6  | 0 | -4.358464 | 3.966909  | -0.747463 |
| 30 | 6  | 0 | -3.765013 | 3.663584  | 0.470040  |

|    |    |   |           |           |           |
|----|----|---|-----------|-----------|-----------|
| 31 | 6  | 0 | -3.204653 | 2.417478  | 0.676314  |
| 32 | 1  | 0 | -3.869690 | 1.028066  | -2.341010 |
| 33 | 1  | 0 | -4.863206 | 3.239574  | -2.700047 |
| 34 | 1  | 0 | -4.796376 | 4.945141  | -0.910282 |
| 35 | 1  | 0 | -3.736202 | 4.403434  | 1.262298  |
| 36 | 1  | 0 | -2.737707 | 2.193181  | 1.630841  |
| 37 | 6  | 0 | 3.226437  | 1.463881  | 0.267335  |
| 38 | 6  | 0 | 3.855001  | 1.806503  | 1.457664  |
| 39 | 6  | 0 | 4.419712  | 3.064152  | 1.615551  |
| 40 | 6  | 0 | 4.361101  | 3.988785  | 0.588510  |
| 41 | 6  | 0 | 3.741895  | 3.651024  | -0.606975 |
| 42 | 6  | 0 | 3.179519  | 2.399010  | -0.766294 |
| 43 | 1  | 0 | 3.911387  | 1.095089  | 2.273736  |
| 44 | 1  | 0 | 4.910012  | 3.316714  | 2.548994  |
| 45 | 1  | 0 | 4.800429  | 4.971795  | 0.714514  |
| 46 | 1  | 0 | 3.695043  | 4.368452  | -1.418774 |
| 47 | 1  | 0 | 2.693292  | 2.146597  | -1.704112 |
| 48 | 6  | 0 | 2.956449  | -1.193002 | 1.357458  |
| 49 | 6  | 0 | 3.891625  | -2.203362 | 1.181895  |
| 50 | 6  | 0 | 4.255856  | -3.009307 | 2.250222  |
| 51 | 6  | 0 | 3.694052  | -2.808485 | 3.499025  |
| 52 | 6  | 0 | 2.757732  | -1.801069 | 3.681191  |
| 53 | 6  | 0 | 2.384667  | -1.005279 | 2.614379  |
| 54 | 1  | 0 | 4.333232  | -2.380123 | 0.207646  |
| 55 | 1  | 0 | 4.982016  | -3.800446 | 2.101159  |
| 56 | 1  | 0 | 3.980225  | -3.440621 | 4.331991  |
| 57 | 1  | 0 | 2.309156  | -1.642776 | 4.655394  |
| 58 | 1  | 0 | 1.632921  | -0.231819 | 2.753123  |
| 59 | 6  | 0 | 3.098673  | -0.718960 | -1.537603 |
| 60 | 6  | 0 | 4.475002  | -0.652305 | -1.750380 |
| 61 | 6  | 0 | 5.016692  | -1.078320 | -2.949188 |
| 62 | 6  | 0 | 4.189325  | -1.562947 | -3.951832 |
| 63 | 6  | 0 | 2.820865  | -1.620670 | -3.752982 |
| 64 | 6  | 0 | 2.276444  | -1.200344 | -2.549627 |
| 65 | 1  | 0 | 5.126607  | -0.260271 | -0.975250 |
| 66 | 1  | 0 | 6.088293  | -1.027060 | -3.104715 |
| 67 | 1  | 0 | 4.615298  | -1.891446 | -4.893167 |
| 68 | 1  | 0 | 2.171104  | -1.991847 | -4.537377 |
| 69 | 1  | 0 | 1.204097  | -1.251302 | -2.386871 |
| 70 | 6  | 0 | -0.003427 | 1.901874  | -0.009259 |
| 71 | 6  | 0 | 0.227232  | 2.611685  | 1.165103  |
| 72 | 6  | 0 | 0.230179  | 4.000614  | 1.168723  |
| 73 | 6  | 0 | 0.005112  | 4.702791  | -0.005863 |
| 74 | 6  | 0 | -0.224844 | 4.004754  | -1.181996 |
| 75 | 6  | 0 | -0.231103 | 2.615929  | -1.181580 |
| 76 | 1  | 0 | 0.412947  | 2.081285  | 2.096688  |
| 77 | 1  | 0 | 0.411440  | 4.535565  | 2.095838  |
| 78 | 1  | 0 | 0.009026  | 5.787287  | -0.004694 |
| 79 | 1  | 0 | -0.402616 | 4.542930  | -2.107937 |
| 80 | 1  | 0 | -0.418377 | 2.089600  | -2.115023 |
| 81 | 35 | 0 | 0.001742  | -2.707363 | 0.016985  |

---

15 Ph-SO<sub>2</sub>-N--CH<sub>2</sub>CH<sub>2</sub>CH<sub>2</sub>-CH=C=CH<sub>2</sub> IV'

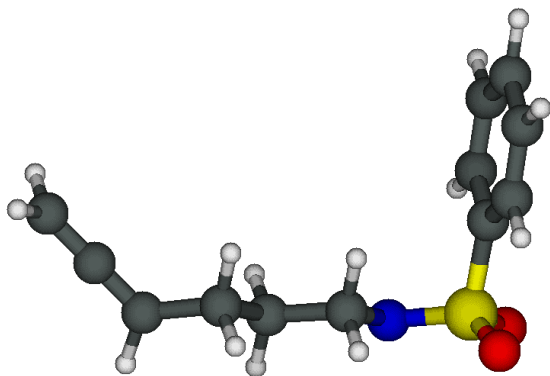


---

|    |    |   |           |           |           |
|----|----|---|-----------|-----------|-----------|
| 1  | 7  | 0 | 0.127342  | -1.435293 | -0.602445 |
| 2  | 6  | 0 | -0.831568 | -0.910916 | 0.346848  |
| 3  | 6  | 0 | -2.209292 | -0.861001 | -0.278345 |
| 4  | 1  | 0 | -0.885318 | -1.518876 | 1.266042  |
| 5  | 1  | 0 | -0.571722 | 0.111423  | 0.686197  |
| 6  | 6  | 0 | -3.260154 | -0.312143 | 0.671164  |
| 7  | 1  | 0 | -2.173803 | -0.246247 | -1.185925 |
| 8  | 1  | 0 | -2.493955 | -1.870144 | -0.601768 |
| 9  | 6  | 0 | -4.629490 | -0.318173 | 0.065131  |
| 10 | 1  | 0 | -3.270000 | -0.923272 | 1.582792  |
| 11 | 1  | 0 | -2.995957 | 0.705087  | 0.977921  |
| 12 | 6  | 0 | -5.371348 | 0.733103  | -0.119827 |
| 13 | 1  | 0 | -5.013240 | -1.286109 | -0.259349 |
| 14 | 6  | 0 | -6.107868 | 1.788344  | -0.298734 |
| 15 | 1  | 0 | -6.812102 | 2.126947  | 0.456783  |
| 16 | 1  | 0 | -6.050756 | 2.375310  | -1.211706 |
| 17 | 16 | 0 | 1.595203  | -1.482047 | -0.110682 |
| 18 | 6  | 0 | 2.154601  | 0.223501  | -0.018050 |
| 19 | 8  | 0 | 1.778909  | -1.991831 | 1.240872  |
| 20 | 8  | 0 | 2.429098  | -2.095848 | -1.125401 |
| 21 | 6  | 0 | 2.404764  | 0.836404  | 1.198887  |
| 22 | 6  | 0 | 2.788069  | 2.170270  | 1.240773  |
| 23 | 6  | 0 | 2.921869  | 2.891707  | 0.067455  |
| 24 | 6  | 0 | 2.666713  | 2.279250  | -1.152677 |
| 25 | 6  | 0 | 2.279322  | 0.952477  | -1.194956 |
| 26 | 1  | 0 | 2.303507  | 0.259917  | 2.111190  |
| 27 | 1  | 0 | 2.983627  | 2.645054  | 2.196135  |
| 28 | 1  | 0 | 3.223975  | 3.932544  | 0.099689  |
| 29 | 1  | 0 | 2.770248  | 2.841487  | -2.074317 |
| 30 | 1  | 0 | 2.073097  | 0.471183  | -2.145444 |

---



16 Int. A

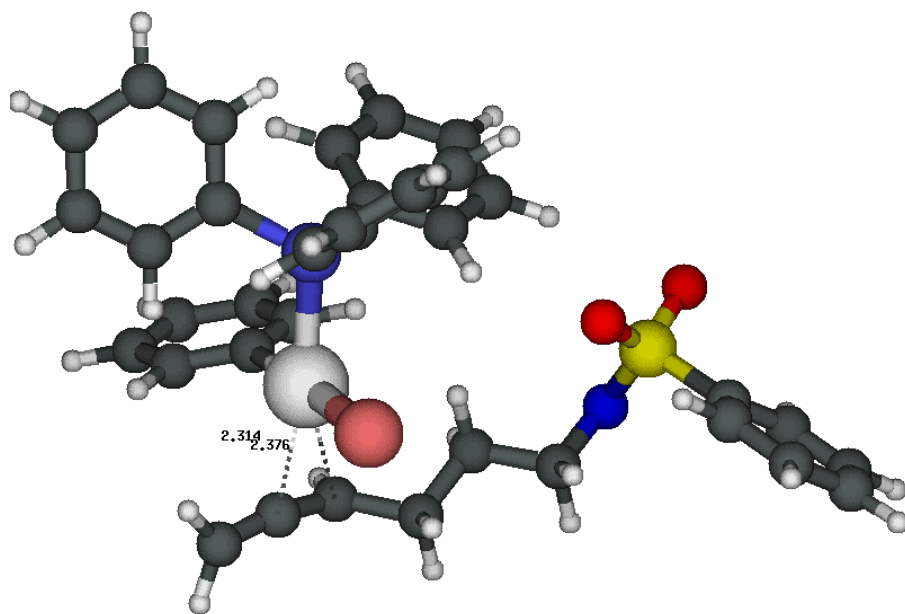


---

|    |    |   |           |           |           |
|----|----|---|-----------|-----------|-----------|
| 1  | 46 | 0 | 0.058950  | 0.064625  | 0.113788  |
| 2  | 15 | 0 | -0.010120 | -0.038173 | 2.441373  |
| 3  | 35 | 0 | 2.622916  | 0.201826  | -0.027492 |
| 4  | 6  | 0 | -0.991327 | 1.367218  | 3.038692  |
| 5  | 6  | 0 | -0.547225 | 2.645339  | 2.698667  |
| 6  | 6  | 0 | -1.305885 | 3.758915  | 3.012683  |
| 7  | 6  | 0 | -2.524840 | 3.606884  | 3.657309  |
| 8  | 6  | 0 | -2.977653 | 2.340528  | 3.987057  |
| 9  | 6  | 0 | -2.216919 | 1.223695  | 3.677918  |
| 10 | 1  | 0 | 0.392226  | 2.792030  | 2.170367  |
| 11 | 1  | 0 | -0.937509 | 4.744120  | 2.740117  |
| 12 | 1  | 0 | -3.124790 | 4.477312  | 3.898280  |
| 13 | 1  | 0 | -3.933850 | 2.215293  | 4.482508  |
| 14 | 1  | 0 | -2.599442 | 0.238257  | 3.918951  |
| 15 | 6  | 0 | -0.700848 | -1.562964 | 3.150769  |
| 16 | 6  | 0 | -0.885369 | -2.674791 | 2.339597  |
| 17 | 6  | 0 | -1.317559 | -3.874919 | 2.882270  |
| 18 | 6  | 0 | -1.565043 | -3.969335 | 4.240359  |
| 19 | 6  | 0 | -1.363280 | -2.868764 | 5.061144  |
| 20 | 6  | 0 | -0.923221 | -1.674142 | 4.522737  |
| 21 | 1  | 0 | -0.673037 | -2.601414 | 1.277989  |
| 22 | 1  | 0 | -1.455858 | -4.737515 | 2.240657  |
| 23 | 1  | 0 | -1.906554 | -4.906148 | 4.665894  |
| 24 | 1  | 0 | -1.541407 | -2.945268 | 6.127669  |
| 25 | 1  | 0 | -0.741292 | -0.825219 | 5.174698  |
| 26 | 6  | 0 | 1.576887  | 0.044463  | 3.342662  |
| 27 | 6  | 0 | 2.430325  | -1.050027 | 3.219978  |
| 28 | 6  | 0 | 3.635377  | -1.078584 | 3.894203  |
| 29 | 6  | 0 | 4.012000  | -0.006542 | 4.690704  |
| 30 | 6  | 0 | 3.171738  | 1.085003  | 4.814414  |
| 31 | 6  | 0 | 1.955556  | 1.110947  | 4.146690  |
| 32 | 1  | 0 | 2.148846  | -1.887170 | 2.588623  |
| 33 | 1  | 0 | 4.288233  | -1.938268 | 3.793656  |
| 34 | 1  | 0 | 4.959894  | -0.026307 | 5.216545  |
| 35 | 1  | 0 | 3.454941  | 1.923933  | 5.440001  |
| 36 | 1  | 0 | 1.305611  | 1.968968  | 4.269146  |
| 37 | 6  | 0 | -1.975521 | -0.107762 | 0.149756  |

|    |    |   |           |           |           |
|----|----|---|-----------|-----------|-----------|
| 38 | 6  | 0 | -2.804258 | 0.974880  | 0.423869  |
| 39 | 6  | 0 | -4.184297 | 0.862896  | 0.311921  |
| 40 | 6  | 0 | -4.759248 | -0.334892 | -0.081033 |
| 41 | 6  | 0 | -3.942291 | -1.415241 | -0.373624 |
| 42 | 6  | 0 | -2.562038 | -1.300305 | -0.264169 |
| 43 | 1  | 0 | -2.379886 | 1.928277  | 0.726522  |
| 44 | 1  | 0 | -4.809641 | 1.722275  | 0.533324  |
| 45 | 1  | 0 | -5.836667 | -0.424259 | -0.165449 |
| 46 | 1  | 0 | -4.377411 | -2.356956 | -0.692707 |
| 47 | 1  | 0 | -1.945445 | -2.159538 | -0.512589 |
| 48 | 6  | 0 | 0.108669  | -0.257063 | -2.176940 |
| 49 | 6  | 0 | -0.332373 | 0.991678  | -2.038538 |
| 50 | 6  | 0 | 0.462606  | -1.442296 | -2.577548 |
| 51 | 1  | 0 | 0.448646  | -1.686430 | -3.637249 |
| 52 | 1  | 0 | 0.790885  | -2.216387 | -1.891668 |
| 53 | 6  | 0 | 0.464447  | 2.254317  | -2.142199 |
| 54 | 1  | 0 | -1.413460 | 1.126520  | -1.995715 |
| 55 | 6  | 0 | 0.033028  | 3.279182  | -1.108540 |
| 56 | 1  | 0 | 1.531200  | 2.032300  | -2.052441 |
| 57 | 1  | 0 | 0.296701  | 2.661909  | -3.148825 |
| 58 | 6  | 0 | 0.777452  | 4.595881  | -1.211017 |
| 59 | 1  | 0 | -1.043650 | 3.471354  | -1.208895 |
| 60 | 1  | 0 | 0.181095  | 2.867755  | -0.102156 |
| 61 | 7  | 0 | 0.242951  | 5.594083  | -0.302332 |
| 62 | 1  | 0 | 1.852706  | 4.398463  | -1.058982 |
| 63 | 1  | 0 | 0.689442  | 4.966434  | -2.244156 |
| 64 | 16 | 0 | 1.090598  | 5.921867  | 0.948275  |
| 65 | 6  | 0 | 2.497654  | 6.887857  | 0.385319  |
| 66 | 8  | 0 | 0.345488  | 6.817318  | 1.814557  |
| 67 | 8  | 0 | 1.698009  | 4.778895  | 1.618410  |
| 68 | 6  | 0 | 3.786073  | 6.380483  | 0.432696  |
| 69 | 6  | 0 | 4.847437  | 7.131842  | -0.053641 |
| 70 | 6  | 0 | 4.623218  | 8.390127  | -0.584053 |
| 71 | 6  | 0 | 3.331562  | 8.898480  | -0.633087 |
| 72 | 6  | 0 | 2.272674  | 8.148414  | -0.156084 |
| 73 | 1  | 0 | 3.951792  | 5.397569  | 0.858264  |
| 74 | 1  | 0 | 5.854046  | 6.729958  | -0.014219 |
| 75 | 1  | 0 | 5.452730  | 8.978101  | -0.960731 |
| 76 | 1  | 0 | 3.151650  | 9.884504  | -1.047422 |
| 77 | 1  | 0 | 1.261086  | 8.539025  | -0.198646 |

---

17 TS<sub>B</sub>

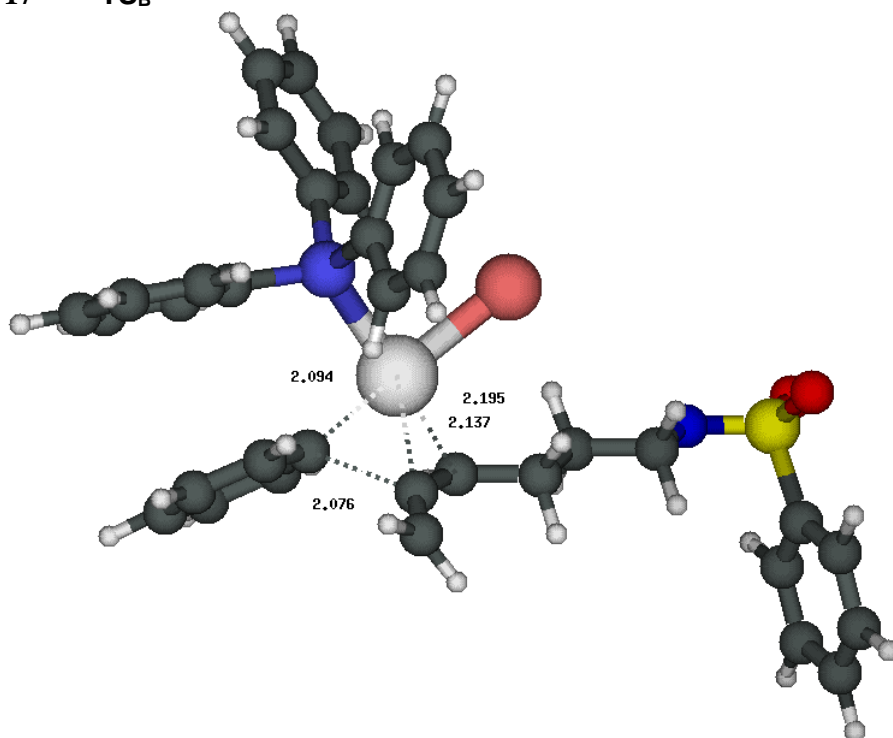


---

|    |    |   |           |           |           |
|----|----|---|-----------|-----------|-----------|
| 1  | 46 | 0 | -0.042730 | 0.091967  | -0.001132 |
| 2  | 15 | 0 | -0.007661 | 0.019337  | 2.405924  |
| 3  | 35 | 0 | 2.496213  | 0.144445  | 0.096597  |
| 4  | 6  | 0 | 0.771203  | 1.427648  | 3.262897  |
| 5  | 6  | 0 | 1.307054  | 2.482322  | 2.534535  |
| 6  | 6  | 0 | 1.834588  | 3.586916  | 3.185288  |
| 7  | 6  | 0 | 1.832567  | 3.644108  | 4.567868  |
| 8  | 6  | 0 | 1.293244  | 2.598821  | 5.303528  |
| 9  | 6  | 0 | 0.757647  | 1.501108  | 4.655659  |
| 10 | 1  | 0 | 1.318910  | 2.433564  | 1.451353  |
| 11 | 1  | 0 | 2.246758  | 4.405584  | 2.606422  |
| 12 | 1  | 0 | 2.246587  | 4.507513  | 5.076431  |
| 13 | 1  | 0 | 1.283269  | 2.642827  | 6.386675  |
| 14 | 1  | 0 | 0.319196  | 0.696393  | 5.238277  |
| 15 | 6  | 0 | -1.611358 | -0.045948 | 3.277463  |
| 16 | 6  | 0 | -2.404009 | 1.099725  | 3.226644  |
| 17 | 6  | 0 | -3.645524 | 1.122212  | 3.832513  |
| 18 | 6  | 0 | -4.116480 | -0.003626 | 4.493561  |
| 19 | 6  | 0 | -3.335325 | -1.144450 | 4.548937  |
| 20 | 6  | 0 | -2.086063 | -1.167099 | 3.945279  |
| 21 | 1  | 0 | -2.045079 | 1.983057  | 2.704696  |
| 22 | 1  | 0 | -4.251884 | 2.019907  | 3.784555  |
| 23 | 1  | 0 | -5.091555 | 0.012037  | 4.967084  |
| 24 | 1  | 0 | -3.693939 | -2.025131 | 5.069877  |
| 25 | 1  | 0 | -1.484053 | -2.067167 | 4.003130  |
| 26 | 6  | 0 | 0.869555  | -1.490111 | 2.915653  |
| 27 | 6  | 0 | 0.473952  | -2.682761 | 2.311877  |
| 28 | 6  | 0 | 1.115464  | -3.869663 | 2.613852  |
| 29 | 6  | 0 | 2.175387  | -3.876143 | 3.508456  |
| 30 | 6  | 0 | 2.586110  | -2.692917 | 4.097255  |
| 31 | 6  | 0 | 1.935749  | -1.503672 | 3.804817  |
| 32 | 1  | 0 | -0.339982 | -2.678138 | 1.590106  |
| 33 | 1  | 0 | 0.795087  | -4.790954 | 2.140847  |
| 34 | 1  | 0 | 2.686328  | -4.804196 | 3.738593  |

|    |    |   |           |           |            |
|----|----|---|-----------|-----------|------------|
| 35 | 1  | 0 | 3.421940  | -2.690035 | 4.787833   |
| 36 | 1  | 0 | 2.277602  | -0.584179 | 4.266039   |
| 37 | 6  | 0 | -2.129872 | 0.116688  | -0.168580  |
| 38 | 6  | 0 | -2.678045 | 1.333051  | -0.561623  |
| 39 | 6  | 0 | -4.019124 | 1.612273  | -0.318763  |
| 40 | 6  | 0 | -4.825968 | 0.674826  | 0.297940   |
| 41 | 6  | 0 | -4.282267 | -0.543822 | 0.692817   |
| 42 | 6  | 0 | -2.947655 | -0.815079 | 0.471616   |
| 43 | 1  | 0 | -2.069018 | 2.076574  | -1.065039  |
| 44 | 1  | 0 | -4.429017 | 2.568085  | -0.627040  |
| 45 | 1  | 0 | -5.874295 | 0.886901  | 0.475234   |
| 46 | 1  | 0 | -4.905379 | -1.283312 | 1.185124   |
| 47 | 1  | 0 | -2.539051 | -1.771922 | 0.783894   |
| 48 | 6  | 0 | -1.026484 | -0.726670 | -1.712266  |
| 49 | 6  | 0 | -0.170304 | 0.247144  | -2.186890  |
| 50 | 6  | 0 | -1.469305 | -1.934964 | -2.004184  |
| 51 | 1  | 0 | -1.902957 | -2.609658 | -1.276409  |
| 52 | 1  | 0 | -1.451050 | -2.259764 | -3.041874  |
| 53 | 6  | 0 | 1.018071  | -0.104349 | -3.029354  |
| 54 | 1  | 0 | -0.560309 | 1.257202  | -2.316933  |
| 55 | 6  | 0 | 1.868150  | 1.095172  | -3.389572  |
| 56 | 1  | 0 | 1.623234  | -0.867235 | -2.528329  |
| 57 | 1  | 0 | 0.636517  | -0.572931 | -3.950248  |
| 58 | 6  | 0 | 3.089674  | 0.718989  | -4.198502  |
| 59 | 1  | 0 | 1.266620  | 1.815416  | -3.958504  |
| 60 | 1  | 0 | 2.188100  | 1.601567  | -2.471550  |
| 61 | 7  | 0 | 3.832395  | 1.908040  | -4.560012  |
| 62 | 1  | 0 | 3.695068  | 0.012224  | -3.605005  |
| 63 | 1  | 0 | 2.755539  | 0.147214  | -5.087576  |
| 64 | 16 | 0 | 5.092631  | 1.676462  | -5.428638  |
| 65 | 6  | 0 | 4.503868  | 1.181758  | -7.053488  |
| 66 | 8  | 0 | 5.773558  | 2.938114  | -5.644802  |
| 67 | 8  | 0 | 5.943432  | 0.572472  | -5.006787  |
| 68 | 6  | 0 | 4.655534  | -0.117115 | -7.511272  |
| 69 | 6  | 0 | 4.143520  | -0.483635 | -8.748724  |
| 70 | 6  | 0 | 3.480412  | 0.446890  | -9.529512  |
| 71 | 6  | 0 | 3.323507  | 1.747839  | -9.069355  |
| 72 | 6  | 0 | 3.827853  | 2.112139  | -7.834297  |
| 73 | 1  | 0 | 5.183429  | -0.836143 | -6.895497  |
| 74 | 1  | 0 | 4.266337  | -1.501547 | -9.102519  |
| 75 | 1  | 0 | 3.083475  | 0.161637  | -10.497388 |
| 76 | 1  | 0 | 2.804326  | 2.479955  | -9.678249  |
| 77 | 1  | 0 | 3.703052  | 3.125974  | -7.468141  |

---

18 Int. B

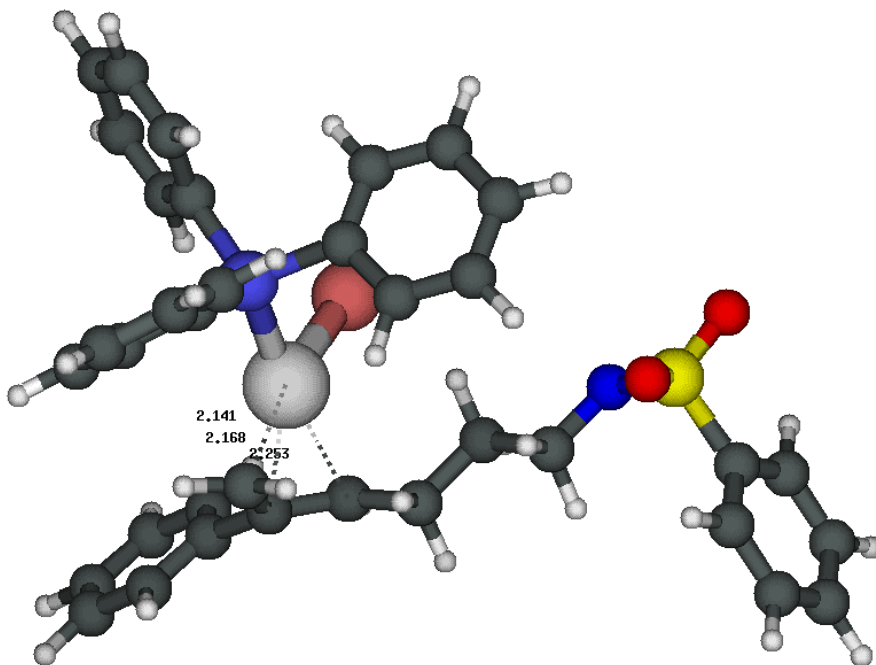


---

|    |    |   |           |           |           |
|----|----|---|-----------|-----------|-----------|
| 1  | 46 | 0 | 0.039533  | -0.014877 | 0.078328  |
| 2  | 15 | 0 | -0.027705 | 0.029335  | 2.410900  |
| 3  | 35 | 0 | 2.580327  | -0.019661 | -0.121276 |
| 4  | 6  | 0 | 0.932287  | 1.243743  | 3.367120  |
| 5  | 6  | 0 | 1.672695  | 2.212814  | 2.702259  |
| 6  | 6  | 0 | 2.370039  | 3.172089  | 3.420641  |
| 7  | 6  | 0 | 2.332103  | 3.165333  | 4.804067  |
| 8  | 6  | 0 | 1.594661  | 2.199663  | 5.474630  |
| 9  | 6  | 0 | 0.893644  | 1.245871  | 4.760422  |
| 10 | 1  | 0 | 1.710978  | 2.202548  | 1.617630  |
| 11 | 1  | 0 | 2.943872  | 3.927148  | 2.895350  |
| 12 | 1  | 0 | 2.876838  | 3.916170  | 5.365452  |
| 13 | 1  | 0 | 1.562940  | 2.193809  | 6.558272  |
| 14 | 1  | 0 | 0.311550  | 0.496466  | 5.289131  |
| 15 | 6  | 0 | -1.665178 | 0.142097  | 3.209082  |
| 16 | 6  | 0 | -2.431852 | 1.268542  | 2.917603  |
| 17 | 6  | 0 | -3.666560 | 1.451065  | 3.512151  |
| 18 | 6  | 0 | -4.155555 | 0.502668  | 4.398882  |
| 19 | 6  | 0 | -3.400474 | -0.619292 | 4.693042  |
| 20 | 6  | 0 | -2.157096 | -0.798881 | 4.105176  |
| 21 | 1  | 0 | -2.052056 | 2.010661  | 2.219883  |
| 22 | 1  | 0 | -4.252005 | 2.333506  | 3.280108  |
| 23 | 1  | 0 | -5.126732 | 0.640596  | 4.860469  |
| 24 | 1  | 0 | -3.776251 | -1.361140 | 5.388725  |
| 25 | 1  | 0 | -1.569460 | -1.675820 | 4.354448  |
| 26 | 6  | 0 | 0.621160  | -1.614638 | 2.834673  |
| 27 | 6  | 0 | -0.044357 | -2.723029 | 2.307568  |
| 28 | 6  | 0 | 0.491595  | -3.990625 | 2.432661  |
| 29 | 6  | 0 | 1.705978  | -4.165533 | 3.082135  |
| 30 | 6  | 0 | 2.368227  | -3.073669 | 3.615221  |
| 31 | 6  | 0 | 1.830280  | -1.800885 | 3.491639  |
| 32 | 1  | 0 | -0.982849 | -2.585617 | 1.775369  |
| 33 | 1  | 0 | -0.010166 | -4.846709 | 1.992363  |
| 34 | 1  | 0 | 2.137155  | -5.158013 | 3.159170  |
| 35 | 1  | 0 | 3.317257  | -3.206607 | 4.122483  |
| 36 | 1  | 0 | 2.371890  | -0.950669 | 3.891788  |

|    |    |   |           |           |           |
|----|----|---|-----------|-----------|-----------|
| 37 | 6  | 0 | -1.339060 | 1.526655  | -2.230820 |
| 38 | 6  | 0 | -0.171127 | 2.133285  | -2.689588 |
| 39 | 6  | 0 | -0.216941 | 3.367983  | -3.310300 |
| 40 | 6  | 0 | -1.429322 | 4.018018  | -3.487908 |
| 41 | 6  | 0 | -2.595088 | 3.425010  | -3.034565 |
| 42 | 6  | 0 | -2.549441 | 2.190477  | -2.407616 |
| 43 | 1  | 0 | 0.785397  | 1.644065  | -2.534825 |
| 44 | 1  | 0 | 0.702332  | 3.830633  | -3.651644 |
| 45 | 1  | 0 | -1.462758 | 4.985731  | -3.975362 |
| 46 | 1  | 0 | -3.548394 | 3.923455  | -3.169996 |
| 47 | 1  | 0 | -3.467334 | 1.725308  | -2.063672 |
| 48 | 6  | 0 | -1.334411 | 0.189896  | -1.586480 |
| 49 | 6  | 0 | -0.422790 | -0.799803 | -1.982402 |
| 50 | 6  | 0 | -2.052082 | -0.010632 | -0.377500 |
| 51 | 1  | 0 | -2.643327 | 0.810471  | 0.014038  |
| 52 | 1  | 0 | -2.399151 | -0.996577 | -0.084253 |
| 53 | 6  | 0 | -0.613401 | -2.272012 | -1.796809 |
| 54 | 1  | 0 | 0.280403  | -0.529216 | -2.767815 |
| 55 | 6  | 0 | 0.630386  | -3.052322 | -1.408632 |
| 56 | 1  | 0 | -1.408237 | -2.475233 | -1.073366 |
| 57 | 1  | 0 | -0.979071 | -2.660882 | -2.759320 |
| 58 | 6  | 0 | 0.333923  | -4.525243 | -1.218669 |
| 59 | 1  | 0 | 1.411943  | -2.921640 | -2.167191 |
| 60 | 1  | 0 | 1.047673  | -2.649667 | -0.477730 |
| 61 | 7  | 0 | 1.535196  | -5.231250 | -0.829812 |
| 62 | 1  | 0 | -0.466175 | -4.620329 | -0.462721 |
| 63 | 1  | 0 | -0.097635 | -4.924580 | -2.158019 |
| 64 | 16 | 0 | 1.338292  | -6.682106 | -0.327545 |
| 65 | 6  | 0 | 0.860208  | -7.648689 | -1.763181 |
| 66 | 8  | 0 | 2.611933  | -7.229291 | 0.095425  |
| 67 | 8  | 0 | 0.238653  | -6.871792 | 0.610752  |
| 68 | 6  | 0 | -0.452219 | -8.052078 | -1.951686 |
| 69 | 6  | 0 | -0.810835 | -8.735210 | -3.105675 |
| 70 | 6  | 0 | 0.140249  | -9.015197 | -4.071598 |
| 71 | 6  | 0 | 1.454092  | -8.605892 | -3.885825 |
| 72 | 6  | 0 | 1.811699  | -7.920165 | -2.739213 |
| 73 | 1  | 0 | -1.187880 | -7.834921 | -1.185635 |
| 74 | 1  | 0 | -1.838733 | -9.050986 | -3.247305 |
| 75 | 1  | 0 | -0.139149 | -9.552006 | -4.971301 |
| 76 | 1  | 0 | 2.202094  | -8.822969 | -4.640531 |
| 77 | 1  | 0 | 2.835920  | -7.593938 | -2.591348 |

---

19 Int. B'

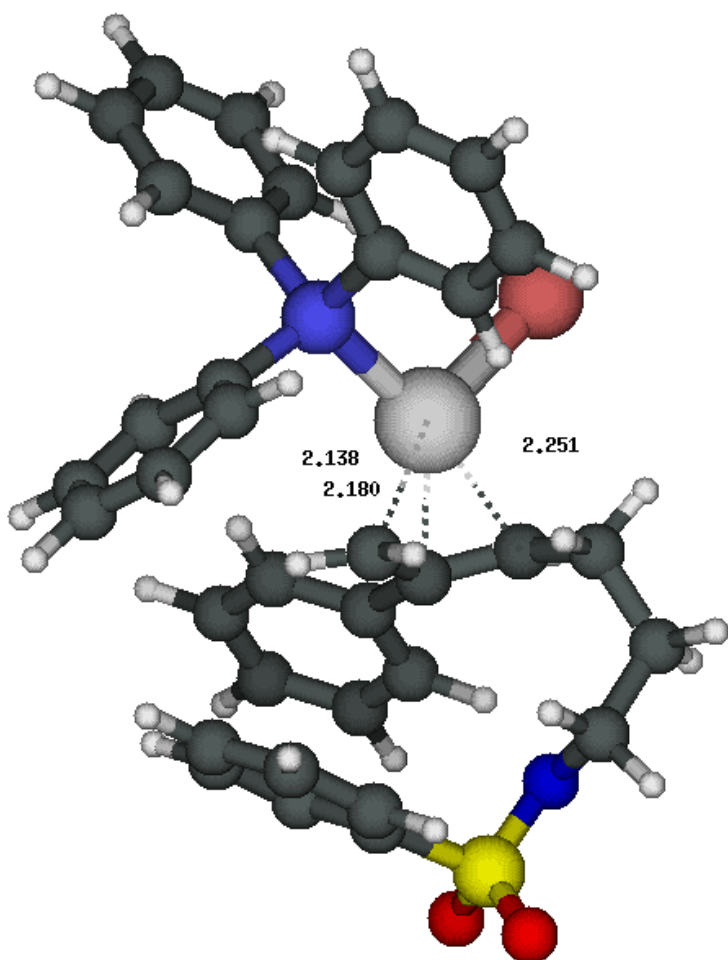


---

|    |    |   |           |           |           |
|----|----|---|-----------|-----------|-----------|
| 1  | 46 | 0 | 0.005445  | 0.010284  | 0.015943  |
| 2  | 15 | 0 | -0.037865 | -0.025378 | 2.363756  |
| 3  | 35 | 0 | 2.510973  | -0.073626 | -0.412393 |
| 4  | 6  | 0 | 0.863980  | 1.236739  | 3.321444  |
| 5  | 6  | 0 | 1.944472  | 1.880685  | 2.727039  |
| 6  | 6  | 0 | 2.666937  | 2.830315  | 3.431694  |
| 7  | 6  | 0 | 2.313832  | 3.148433  | 4.731902  |
| 8  | 6  | 0 | 1.235354  | 2.514595  | 5.330202  |
| 9  | 6  | 0 | 0.512804  | 1.565024  | 4.630124  |
| 10 | 1  | 0 | 2.221618  | 1.627991  | 1.707004  |
| 11 | 1  | 0 | 3.506558  | 3.326946  | 2.958502  |
| 12 | 1  | 0 | 2.876170  | 3.895422  | 5.280897  |
| 13 | 1  | 0 | 0.953282  | 2.762720  | 6.347180  |
| 14 | 1  | 0 | -0.333583 | 1.080437  | 5.105872  |
| 15 | 6  | 0 | -1.744204 | 0.090501  | 3.000071  |
| 16 | 6  | 0 | -2.377849 | 1.332612  | 2.989525  |
| 17 | 6  | 0 | -3.716273 | 1.442039  | 3.318871  |
| 18 | 6  | 0 | -4.444191 | 0.309485  | 3.656876  |
| 19 | 6  | 0 | -3.825466 | -0.928280 | 3.660272  |
| 20 | 6  | 0 | -2.480998 | -1.039099 | 3.334561  |
| 21 | 1  | 0 | -1.819638 | 2.222720  | 2.712739  |
| 22 | 1  | 0 | -4.194729 | 2.415173  | 3.311039  |
| 23 | 1  | 0 | -5.493925 | 0.394580  | 3.914129  |
| 24 | 1  | 0 | -4.387942 | -1.817470 | 3.922287  |
| 25 | 1  | 0 | -2.011180 | -2.017382 | 3.338142  |
| 26 | 6  | 0 | 0.556994  | -1.633302 | 2.985367  |

|    |    |   |           |           |           |
|----|----|---|-----------|-----------|-----------|
| 27 | 6  | 0 | 0.551922  | -2.714594 | 2.108903  |
| 28 | 6  | 0 | 0.937203  | -3.972247 | 2.542009  |
| 29 | 6  | 0 | 1.342290  | -4.157668 | 3.853484  |
| 30 | 6  | 0 | 1.357222  | -3.084899 | 4.731213  |
| 31 | 6  | 0 | 0.963554  | -1.829034 | 4.301554  |
| 32 | 1  | 0 | 0.247188  | -2.562972 | 1.075823  |
| 33 | 1  | 0 | 0.927250  | -4.807387 | 1.850902  |
| 34 | 1  | 0 | 1.651575  | -5.139962 | 4.192484  |
| 35 | 1  | 0 | 1.677179  | -3.226039 | 5.757424  |
| 36 | 1  | 0 | 0.977106  | -0.998772 | 4.999652  |
| 37 | 6  | 0 | -1.834526 | 1.804498  | -1.759640 |
| 38 | 6  | 0 | -2.067909 | 2.758300  | -0.769614 |
| 39 | 6  | 0 | -2.356564 | 4.068229  | -1.105207 |
| 40 | 6  | 0 | -2.419878 | 4.450314  | -2.437546 |
| 41 | 6  | 0 | -2.187904 | 3.511986  | -3.428834 |
| 42 | 6  | 0 | -1.896960 | 2.199671  | -3.092911 |
| 43 | 1  | 0 | -2.012729 | 2.475096  | 0.276918  |
| 44 | 1  | 0 | -2.528371 | 4.797884  | -0.321759 |
| 45 | 1  | 0 | -2.649639 | 5.476964  | -2.699663 |
| 46 | 1  | 0 | -2.244252 | 3.798337  | -4.473268 |
| 47 | 1  | 0 | -1.771848 | 1.453102  | -3.869532 |
| 48 | 6  | 0 | -1.581795 | 0.380189  | -1.431482 |
| 49 | 6  | 0 | -0.596950 | -0.340501 | -2.123969 |
| 50 | 6  | 0 | -2.105993 | -0.192299 | -0.249415 |
| 51 | 1  | 0 | -2.783942 | 0.386716  | 0.369061  |
| 52 | 1  | 0 | -2.229102 | -1.268905 | -0.165337 |
| 53 | 6  | 0 | -0.516676 | -1.824802 | -2.286781 |
| 54 | 1  | 0 | -0.033726 | 0.220547  | -2.868196 |
| 55 | 6  | 0 | -1.149198 | -2.337070 | -3.581961 |
| 56 | 1  | 0 | 0.540721  | -2.109607 | -2.277081 |
| 57 | 1  | 0 | -0.984128 | -2.346478 | -1.445929 |
| 58 | 6  | 0 | -2.663081 | -2.214579 | -3.650632 |
| 59 | 1  | 0 | -0.709194 | -1.823668 | -4.445381 |
| 60 | 1  | 0 | -0.876174 | -3.393799 | -3.673617 |
| 61 | 7  | 0 | -3.070186 | -0.900930 | -4.106114 |
| 62 | 1  | 0 | -3.048053 | -3.003702 | -4.315113 |
| 63 | 1  | 0 | -3.064291 | -2.457301 | -2.646557 |
| 64 | 16 | 0 | -4.596255 | -0.639381 | -4.162294 |
| 65 | 6  | 0 | -5.136182 | -0.370296 | -2.469414 |
| 66 | 8  | 0 | -4.855038 | 0.614946  | -4.840687 |
| 67 | 8  | 0 | -5.395510 | -1.771005 | -4.612516 |
| 68 | 6  | 0 | -5.521752 | -1.443683 | -1.675292 |
| 69 | 6  | 0 | -5.863351 | -1.241628 | -0.346041 |
| 70 | 6  | 0 | -5.835033 | 0.034208  | 0.193829  |
| 71 | 6  | 0 | -5.456580 | 1.108244  | -0.598655 |
| 72 | 6  | 0 | -5.101679 | 0.907241  | -1.922263 |
| 73 | 1  | 0 | -5.575200 | -2.436182 | -2.107929 |
| 74 | 1  | 0 | -6.165367 | -2.084331 | 0.266693  |
| 75 | 1  | 0 | -6.113490 | 0.193812  | 1.229775  |
| 76 | 1  | 0 | -5.436820 | 2.110182  | -0.181324 |
| 77 | 1  | 0 | -4.804211 | 1.745788  | -2.543486 |

---



20 TS<sub>c</sub>

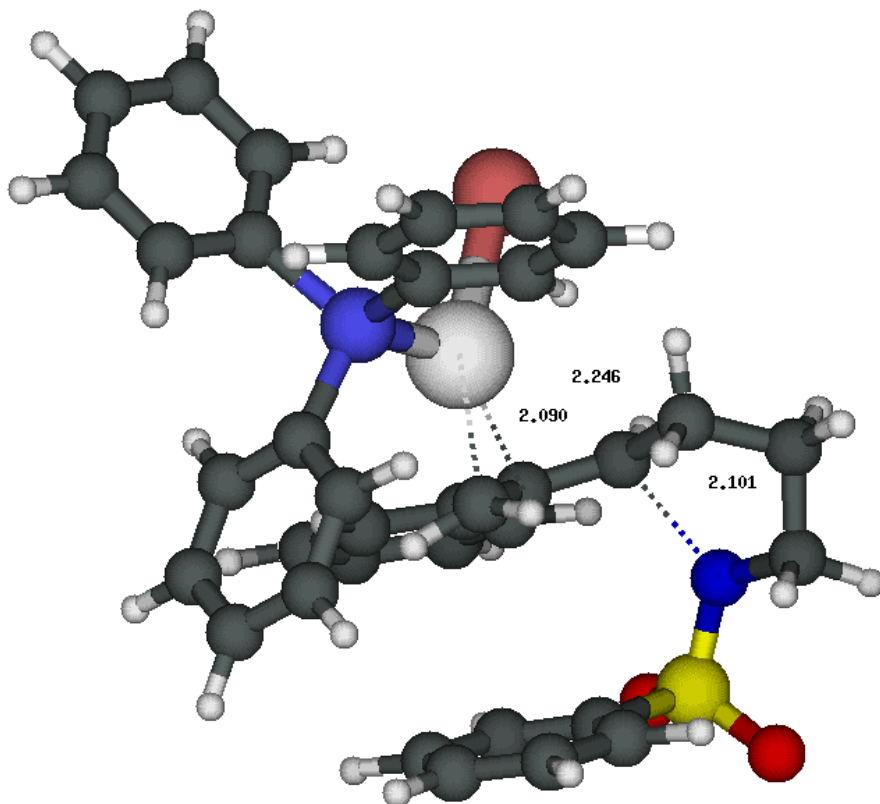


---

|    |    |   |           |           |           |
|----|----|---|-----------|-----------|-----------|
| 1  | 46 | 0 | -0.012284 | -0.019704 | 0.003873  |
| 2  | 15 | 0 | -0.038003 | -0.024298 | 2.303810  |
| 3  | 35 | 0 | 2.411404  | -0.207398 | -0.934442 |
| 4  | 6  | 0 | 1.216743  | 0.893136  | 3.266672  |
| 5  | 6  | 0 | 2.499989  | 0.957056  | 2.729723  |
| 6  | 6  | 0 | 3.519215  | 1.587744  | 3.424435  |
| 7  | 6  | 0 | 3.264392  | 2.171486  | 4.654571  |
| 8  | 6  | 0 | 1.987204  | 2.120826  | 5.191286  |
| 9  | 6  | 0 | 0.968402  | 1.483318  | 4.503493  |
| 10 | 1  | 0 | 2.690822  | 0.519956  | 1.750776  |
| 11 | 1  | 0 | 4.515198  | 1.631675  | 2.997761  |
| 12 | 1  | 0 | 4.060265  | 2.672231  | 5.194517  |
| 13 | 1  | 0 | 1.782133  | 2.579980  | 6.152027  |
| 14 | 1  | 0 | -0.026541 | 1.448338  | 4.935091  |
| 15 | 6  | 0 | -1.634516 | 0.631254  | 2.898690  |
| 16 | 6  | 0 | -1.870442 | 2.002821  | 2.807906  |
| 17 | 6  | 0 | -3.128997 | 2.520689  | 3.055510  |
| 18 | 6  | 0 | -4.178138 | 1.673997  | 3.385221  |
| 19 | 6  | 0 | -3.956391 | 0.309990  | 3.468018  |
| 20 | 6  | 0 | -2.692428 | -0.209205 | 3.228209  |
| 21 | 1  | 0 | -1.062765 | 2.672101  | 2.523974  |
| 22 | 1  | 0 | -3.294143 | 3.590148  | 2.985045  |
| 23 | 1  | 0 | -5.166541 | 2.078496  | 3.572314  |
| 24 | 1  | 0 | -4.771901 | -0.359316 | 3.719723  |
| 25 | 1  | 0 | -2.538614 | -1.282253 | 3.285438  |
| 26 | 6  | 0 | 0.044124  | -1.703314 | 3.024955  |
| 27 | 6  | 0 | 0.026076  | -2.796313 | 2.166197  |
| 28 | 6  | 0 | 0.069658  | -4.088146 | 2.668000  |
| 29 | 6  | 0 | 0.134805  | -4.295935 | 4.034686  |
| 30 | 6  | 0 | 0.155030  | -3.211213 | 4.900049  |
| 31 | 6  | 0 | 0.109975  | -1.922796 | 4.398952  |

|    |    |   |           |           |           |
|----|----|---|-----------|-----------|-----------|
| 32 | 1  | 0 | -0.015376 | -2.623375 | 1.093468  |
| 33 | 1  | 0 | 0.056334  | -4.932442 | 1.987993  |
| 34 | 1  | 0 | 0.172695  | -5.304898 | 4.429803  |
| 35 | 1  | 0 | 0.206796  | -3.371710 | 5.971137  |
| 36 | 1  | 0 | 0.122889  | -1.081390 | 5.084970  |
| 37 | 6  | 0 | -1.433926 | 1.644889  | -2.108537 |
| 38 | 6  | 0 | -1.539932 | 2.757131  | -1.262963 |
| 39 | 6  | 0 | -1.436361 | 4.047595  | -1.748110 |
| 40 | 6  | 0 | -1.215503 | 4.277166  | -3.097983 |
| 41 | 6  | 0 | -1.104454 | 3.191029  | -3.949283 |
| 42 | 6  | 0 | -1.216711 | 1.898560  | -3.464238 |
| 43 | 1  | 0 | -1.700886 | 2.616257  | -0.199774 |
| 44 | 1  | 0 | -1.523110 | 4.882690  | -1.061198 |
| 45 | 1  | 0 | -1.132477 | 5.288615  | -3.479284 |
| 46 | 1  | 0 | -0.941739 | 3.347159  | -5.010515 |
| 47 | 1  | 0 | -1.176696 | 1.078227  | -4.169510 |
| 48 | 6  | 0 | -1.574061 | 0.262640  | -1.586004 |
| 49 | 6  | 0 | -1.253840 | -0.835028 | -2.428186 |
| 50 | 6  | 0 | -2.082747 | 0.037235  | -0.277781 |
| 51 | 1  | 0 | -2.574971 | 0.844637  | 0.255870  |
| 52 | 1  | 0 | -2.490407 | -0.940179 | -0.028563 |
| 53 | 6  | 0 | -1.157494 | -2.258828 | -1.991891 |
| 54 | 1  | 0 | -0.606113 | -0.606400 | -3.268191 |
| 55 | 6  | 0 | -1.525330 | -3.177304 | -3.137598 |
| 56 | 1  | 0 | -0.127895 | -2.438646 | -1.663630 |
| 57 | 1  | 0 | -1.811258 | -2.459859 | -1.137831 |
| 58 | 6  | 0 | -2.898067 | -2.746053 | -3.589795 |
| 59 | 1  | 0 | -0.808603 | -3.057271 | -3.957684 |
| 60 | 1  | 0 | -1.509752 | -4.224681 | -2.829304 |
| 61 | 7  | 0 | -2.801227 | -1.307078 | -3.768578 |
| 62 | 1  | 0 | -3.194340 | -3.248740 | -4.516807 |
| 63 | 1  | 0 | -3.630735 | -3.034675 | -2.818864 |
| 64 | 16 | 0 | -4.147100 | -0.516681 | -4.024344 |
| 65 | 6  | 0 | -4.821965 | -0.047488 | -2.438290 |
| 66 | 8  | 0 | -3.863273 | 0.724838  | -4.698981 |
| 67 | 8  | 0 | -5.142811 | -1.379808 | -4.626010 |
| 68 | 6  | 0 | -5.409133 | -1.011965 | -1.626730 |
| 69 | 6  | 0 | -5.896581 | -0.659327 | -0.379767 |
| 70 | 6  | 0 | -5.809779 | 0.655182  | 0.056307  |
| 71 | 6  | 0 | -5.234191 | 1.616167  | -0.758338 |
| 72 | 6  | 0 | -4.737780 | 1.266319  | -2.004435 |
| 73 | 1  | 0 | -5.500536 | -2.034052 | -1.976260 |
| 74 | 1  | 0 | -6.355815 | -1.412240 | 0.251121  |
| 75 | 1  | 0 | -6.196828 | 0.930069  | 1.031378  |
| 76 | 1  | 0 | -5.164678 | 2.645454  | -0.421603 |
| 77 | 1  | 0 | -4.279755 | 2.010811  | -2.645808 |

---

## 21 Int. C

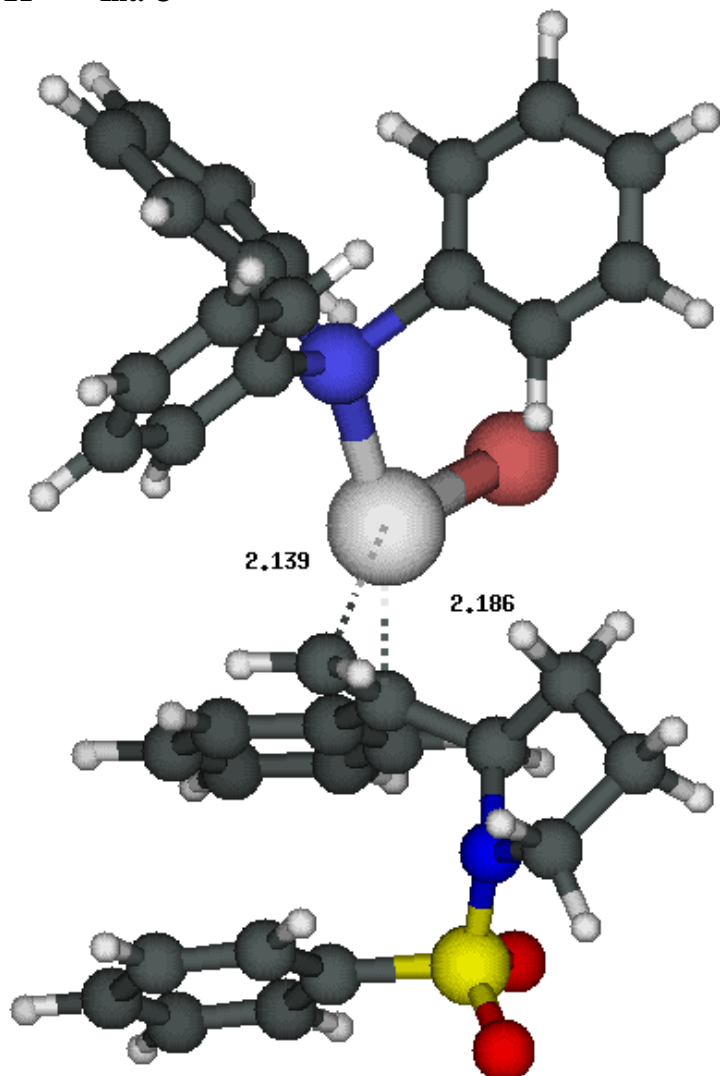


---

|    |    |   |           |           |           |
|----|----|---|-----------|-----------|-----------|
| 1  | 46 | 0 | -0.051067 | 0.019123  | 0.059797  |
| 2  | 15 | 0 | -0.025383 | -0.010524 | 2.382858  |
| 3  | 35 | 0 | 2.557682  | 0.001447  | -0.459392 |
| 4  | 6  | 0 | 0.650933  | 1.458651  | 3.247024  |
| 5  | 6  | 0 | 1.771876  | 2.067574  | 2.685083  |
| 6  | 6  | 0 | 2.358047  | 3.161277  | 3.299087  |
| 7  | 6  | 0 | 1.824973  | 3.670142  | 4.473706  |
| 8  | 6  | 0 | 0.707231  | 3.075409  | 5.035038  |
| 9  | 6  | 0 | 0.125452  | 1.972971  | 4.428203  |
| 10 | 1  | 0 | 2.182072  | 1.669513  | 1.757642  |
| 11 | 1  | 0 | 3.232214  | 3.624180  | 2.854189  |
| 12 | 1  | 0 | 2.279586  | 4.531862  | 4.949663  |
| 13 | 1  | 0 | 0.285281  | 3.468313  | 5.953578  |
| 14 | 1  | 0 | -0.743833 | 1.511979  | 4.886251  |
| 15 | 6  | 0 | -1.634581 | -0.233741 | 3.235802  |
| 16 | 6  | 0 | -2.688203 | 0.580206  | 2.822049  |
| 17 | 6  | 0 | -3.930004 | 0.493399  | 3.424564  |
| 18 | 6  | 0 | -4.145380 | -0.427482 | 4.439967  |
| 19 | 6  | 0 | -3.109652 | -1.247856 | 4.852372  |
| 20 | 6  | 0 | -1.859292 | -1.147855 | 4.259152  |
| 21 | 1  | 0 | -2.524469 | 1.294491  | 2.018884  |
| 22 | 1  | 0 | -4.735981 | 1.140192  | 3.096044  |
| 23 | 1  | 0 | -5.121128 | -0.505612 | 4.906089  |

|    |    |   |           |           |           |
|----|----|---|-----------|-----------|-----------|
| 24 | 1  | 0 | -3.270621 | -1.969543 | 5.645696  |
| 25 | 1  | 0 | -1.055288 | -1.789706 | 4.604566  |
| 26 | 6  | 0 | 0.971499  | -1.376369 | 3.085157  |
| 27 | 6  | 0 | 0.850621  | -2.626324 | 2.481089  |
| 28 | 6  | 0 | 1.553804  | -3.715700 | 2.962398  |
| 29 | 6  | 0 | 2.406229  | -3.566685 | 4.046896  |
| 30 | 6  | 0 | 2.543029  | -2.326865 | 4.647206  |
| 31 | 6  | 0 | 1.825924  | -1.237966 | 4.172653  |
| 32 | 1  | 0 | 0.196173  | -2.739860 | 1.620441  |
| 33 | 1  | 0 | 1.444633  | -4.683045 | 2.484671  |
| 34 | 1  | 0 | 2.966271  | -4.417001 | 4.419613  |
| 35 | 1  | 0 | 3.209687  | -2.203142 | 5.493558  |
| 36 | 1  | 0 | 1.937665  | -0.274739 | 4.660142  |
| 37 | 6  | 0 | -0.691704 | 1.271737  | -2.507146 |
| 38 | 6  | 0 | 0.393659  | 1.388781  | -3.385316 |
| 39 | 6  | 0 | 0.742504  | 2.598723  | -3.956429 |
| 40 | 6  | 0 | 0.026565  | 3.751738  | -3.669293 |
| 41 | 6  | 0 | -1.043165 | 3.664696  | -2.792477 |
| 42 | 6  | 0 | -1.394517 | 2.451883  | -2.226563 |
| 43 | 1  | 0 | 0.997807  | 0.519439  | -3.611700 |
| 44 | 1  | 0 | 1.592472  | 2.641688  | -4.629831 |
| 45 | 1  | 0 | 0.300628  | 4.700192  | -4.117319 |
| 46 | 1  | 0 | -1.622660 | 4.550136  | -2.551228 |
| 47 | 1  | 0 | -2.248337 | 2.426569  | -1.559275 |
| 48 | 6  | 0 | -1.054973 | -0.024516 | -1.881916 |
| 49 | 6  | 0 | -0.778559 | -1.301138 | -2.657158 |
| 50 | 6  | 0 | -1.992637 | -0.077206 | -0.832575 |
| 51 | 1  | 0 | -2.577090 | 0.792087  | -0.549528 |
| 52 | 1  | 0 | -2.501992 | -1.015505 | -0.623046 |
| 53 | 6  | 0 | -0.486579 | -2.549701 | -1.817812 |
| 54 | 1  | 0 | 0.054225  | -1.148094 | -3.346632 |
| 55 | 6  | 0 | -1.068654 | -3.706328 | -2.605759 |
| 56 | 1  | 0 | 0.582394  | -2.630441 | -1.615324 |
| 57 | 1  | 0 | -0.995698 | -2.480858 | -0.853244 |
| 58 | 6  | 0 | -2.360430 | -3.111608 | -3.118968 |
| 59 | 1  | 0 | -0.425152 | -3.968001 | -3.452049 |
| 60 | 1  | 0 | -1.225784 | -4.601380 | -2.001964 |
| 61 | 7  | 0 | -1.955478 | -1.746545 | -3.480935 |
| 62 | 1  | 0 | -2.786860 | -3.629219 | -3.974894 |
| 63 | 1  | 0 | -3.118203 | -3.074224 | -2.325814 |
| 64 | 16 | 0 | -2.252404 | -1.133513 | -4.947194 |
| 65 | 6  | 0 | -3.148452 | 0.362407  | -4.639987 |
| 66 | 8  | 0 | -1.031742 | -0.769052 | -5.609335 |
| 67 | 8  | 0 | -3.155316 | -2.028733 | -5.618194 |
| 68 | 6  | 0 | -4.192134 | 0.348540  | -3.725796 |
| 69 | 6  | 0 | -4.943156 | 1.494247  | -3.537902 |
| 70 | 6  | 0 | -4.654129 | 2.641222  | -4.264105 |
| 71 | 6  | 0 | -3.613934 | 2.644039  | -5.178297 |
| 72 | 6  | 0 | -2.854551 | 1.501006  | -5.371056 |
| 73 | 1  | 0 | -4.406202 | -0.551468 | -3.157446 |
| 74 | 1  | 0 | -5.756429 | 1.493914  | -2.821438 |
| 75 | 1  | 0 | -5.242984 | 3.538628  | -4.112151 |
| 76 | 1  | 0 | -3.384999 | 3.541645  | -5.741276 |
| 77 | 1  | 0 | -2.033137 | 1.493647  | -6.077408 |

---

## 22 P

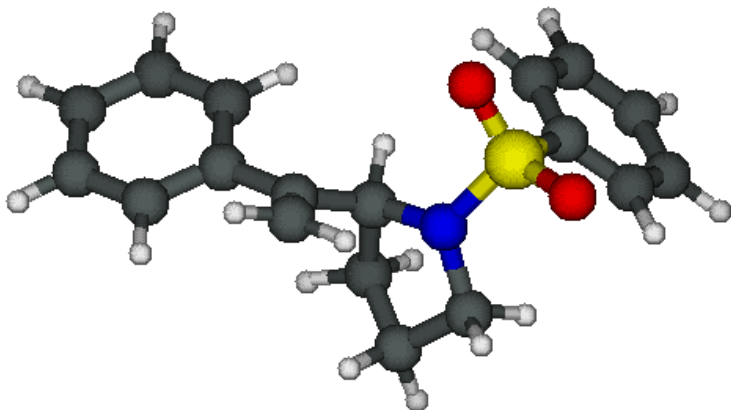


---

|    |    |   |           |           |           |
|----|----|---|-----------|-----------|-----------|
| 1  | 7  | 0 | 0.049850  | 0.076394  | -0.050986 |
| 2  | 6  | 0 | 0.069964  | 0.121817  | 1.423462  |
| 3  | 16 | 0 | 1.455848  | -0.011373 | -0.865757 |
| 4  | 6  | 0 | -1.315135 | -0.362970 | 1.803787  |
| 5  | 6  | 0 | -1.631773 | -1.363805 | 0.708314  |
| 6  | 6  | 0 | -1.122931 | -0.659396 | -0.550933 |
| 7  | 1  | 0 | 0.293625  | 1.130909  | 1.771611  |
| 8  | 1  | 0 | 0.833837  | -0.557806 | 1.820986  |
| 9  | 1  | 0 | -2.027977 | 0.466061  | 1.779258  |
| 10 | 1  | 0 | -1.334757 | -0.795363 | 2.803868  |
| 11 | 1  | 0 | -1.052712 | -2.281025 | 0.860041  |
| 12 | 1  | 0 | -2.687090 | -1.631141 | 0.643569  |
| 13 | 6  | 0 | -2.166186 | 0.241128  | -1.168714 |
| 14 | 1  | 0 | -0.806593 | -1.395159 | -1.295129 |
| 15 | 6  | 0 | 2.044066  | -1.662334 | -0.628498 |
| 16 | 6  | 0 | 1.664090  | -2.661328 | -1.516125 |
| 17 | 6  | 0 | 2.074416  | -3.963061 | -1.288942 |
| 18 | 6  | 0 | 2.857809  | -4.263372 | -0.185851 |
| 19 | 6  | 0 | 3.241149  | -3.261430 | 0.690912  |
| 20 | 6  | 0 | 2.836224  | -1.955758 | 0.474064  |
| 21 | 1  | 0 | 1.067402  | -2.418692 | -2.387496 |
| 22 | 1  | 0 | 1.786186  | -4.745060 | -1.981558 |
| 23 | 1  | 0 | 3.179136  | -5.284169 | -0.013655 |
| 24 | 1  | 0 | 3.864176  | -3.494875 | 1.546309  |
| 25 | 1  | 0 | 3.147943  | -1.165075 | 1.145700  |
| 26 | 8  | 0 | 1.156266  | 0.150201  | -2.256555 |
| 27 | 8  | 0 | 2.368093  | 0.878962  | -0.213169 |
| 28 | 6  | 0 | -2.084572 | 1.566530  | -1.119581 |
| 29 | 6  | 0 | -3.316018 | -0.440295 | -1.803500 |
| 30 | 1  | 0 | -2.842069 | 2.197409  | -1.570867 |
| 31 | 1  | 0 | -1.243735 | 2.061616  | -0.647852 |
| 32 | 6  | 0 | -4.608627 | 0.060425  | -1.646775 |
| 33 | 6  | 0 | -5.690292 | -0.554515 | -2.251489 |
| 34 | 6  | 0 | -5.505108 | -1.690290 | -3.023734 |
| 35 | 6  | 0 | -4.229124 | -2.205644 | -3.180903 |
| 36 | 6  | 0 | -3.147348 | -1.592140 | -2.572374 |
| 37 | 1  | 0 | -4.765183 | 0.937145  | -1.027304 |
| 38 | 1  | 0 | -6.686037 | -0.148751 | -2.111111 |
| 39 | 1  | 0 | -6.352156 | -2.174660 | -3.496071 |
| 40 | 1  | 0 | -4.071482 | -3.092794 | -3.784142 |
| 41 | 1  | 0 | -2.156010 | -2.007327 | -2.719886 |

---

23 TS<sub>D</sub>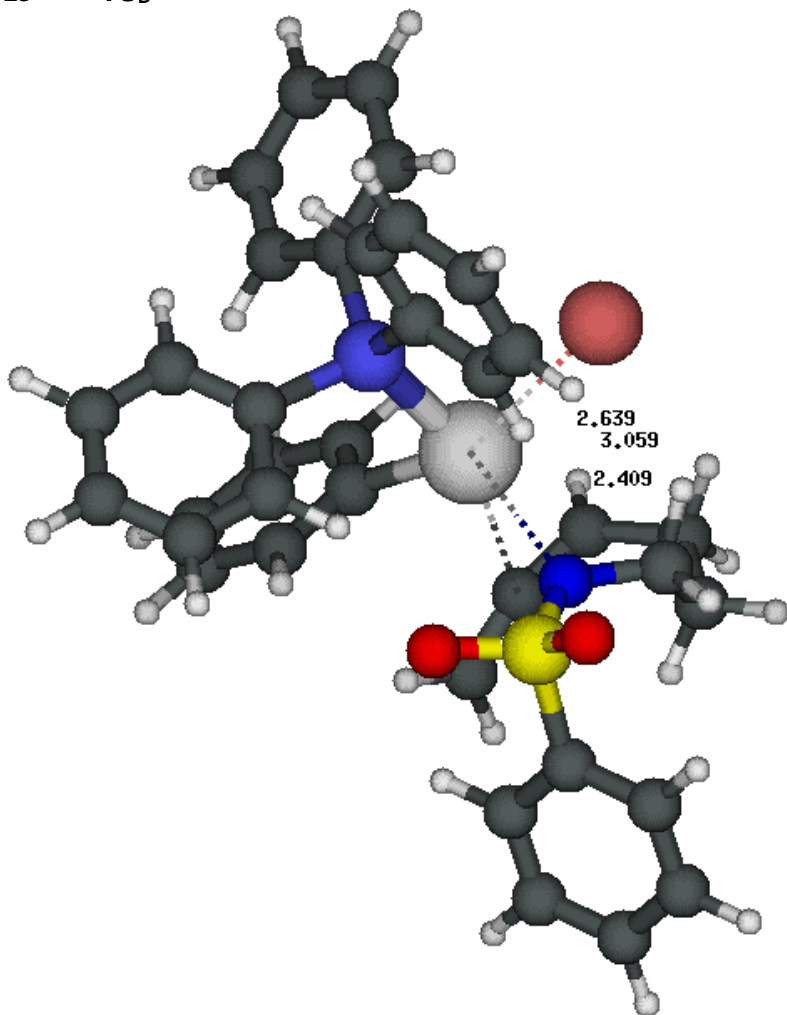


---

|    |    |   |           |           |           |
|----|----|---|-----------|-----------|-----------|
| 1  | 7  | 0 | 0.405790  | -0.015241 | -0.204514 |
| 2  | 6  | 0 | 0.375028  | -0.069497 | 1.246920  |
| 3  | 16 | 0 | 1.779041  | 0.245094  | -0.863090 |
| 4  | 6  | 0 | -0.433946 | 1.052744  | 1.894417  |
| 5  | 1  | 0 | -0.067761 | -1.028018 | 1.558894  |
| 6  | 1  | 0 | 1.386476  | -0.055474 | 1.679063  |
| 7  | 6  | 0 | -1.941633 | 0.862108  | 1.926001  |
| 8  | 1  | 0 | -0.112164 | 1.134195  | 2.939167  |
| 9  | 1  | 0 | -0.174420 | 2.009255  | 1.422186  |
| 10 | 6  | 0 | -2.727042 | 1.083873  | 0.660895  |
| 11 | 1  | 0 | -2.178762 | -0.132180 | 2.314961  |
| 12 | 1  | 0 | -2.369972 | 1.576142  | 2.642875  |
| 13 | 46 | 0 | -2.485445 | -0.532637 | -1.057897 |
| 14 | 6  | 0 | -2.279811 | 1.771885  | -0.385656 |
| 15 | 6  | 0 | 2.219846  | 1.940886  | -0.473582 |
| 16 | 8  | 0 | 2.887434  | -0.537044 | -0.331943 |
| 17 | 8  | 0 | 1.637238  | 0.210437  | -2.308774 |
| 18 | 1  | 0 | -3.802899 | 0.920478  | 0.740967  |
| 19 | 6  | 0 | -1.815129 | 2.708099  | -1.158460 |
| 20 | 1  | 0 | -1.837477 | 3.741991  | -0.820510 |
| 21 | 1  | 0 | -1.405452 | 2.518506  | -2.144038 |
| 22 | 15 | 0 | -2.334685 | -2.315298 | -2.532340 |
| 23 | 6  | 0 | -3.943077 | -3.145746 | -2.676251 |
| 24 | 6  | 0 | -1.743923 | -1.970089 | -4.226841 |
| 25 | 6  | 0 | -1.098663 | -3.589261 | -2.101482 |

|    |    |   |           |           |           |
|----|----|---|-----------|-----------|-----------|
| 26 | 6  | 0 | -3.396604 | 0.451235  | -2.594860 |
| 27 | 6  | 0 | -4.769965 | 0.583305  | -2.415220 |
| 28 | 6  | 0 | -5.549863 | 1.233104  | -3.363539 |
| 29 | 6  | 0 | -4.966259 | 1.753436  | -4.507779 |
| 30 | 6  | 0 | -3.596115 | 1.636353  | -4.685299 |
| 31 | 6  | 0 | -2.816759 | 0.994578  | -3.731249 |
| 32 | 1  | 0 | -5.250243 | 0.168859  | -1.531871 |
| 33 | 1  | 0 | -6.619605 | 1.325585  | -3.205272 |
| 34 | 1  | 0 | -5.573984 | 2.253717  | -5.253573 |
| 35 | 1  | 0 | -3.123803 | 2.050101  | -5.570857 |
| 36 | 1  | 0 | -1.744468 | 0.928810  | -3.887582 |
| 37 | 6  | 0 | -4.949798 | -2.573967 | -3.453924 |
| 38 | 6  | 0 | -6.214783 | -3.134500 | -3.488345 |
| 39 | 6  | 0 | -6.494359 | -4.266939 | -2.740834 |
| 40 | 6  | 0 | -5.504807 | -4.832631 | -1.953823 |
| 41 | 6  | 0 | -4.238309 | -4.274592 | -1.916532 |
| 42 | 1  | 0 | -4.752611 | -1.678074 | -4.032967 |
| 43 | 1  | 0 | -6.984772 | -2.680263 | -4.101765 |
| 44 | 1  | 0 | -7.485316 | -4.705839 | -2.768212 |
| 45 | 1  | 0 | -5.718803 | -5.713912 | -1.359751 |
| 46 | 1  | 0 | -3.478686 | -4.714817 | -1.281609 |
| 47 | 6  | 0 | -2.367291 | -2.394032 | -5.393079 |
| 48 | 6  | 0 | -1.803671 | -2.107605 | -6.627952 |
| 49 | 6  | 0 | -0.610245 | -1.410831 | -6.706829 |
| 50 | 6  | 0 | 0.029099  | -1.008433 | -5.543347 |
| 51 | 6  | 0 | -0.533543 | -1.284183 | -4.310794 |
| 52 | 1  | 0 | -3.293501 | -2.955170 | -5.353116 |
| 53 | 1  | 0 | -2.301922 | -2.438751 | -7.532223 |
| 54 | 1  | 0 | -0.173651 | -1.187515 | -7.673785 |
| 55 | 1  | 0 | 0.969479  | -0.470345 | -5.594201 |
| 56 | 1  | 0 | -0.025415 | -0.946292 | -3.408257 |
| 57 | 6  | 0 | -1.120458 | -4.821006 | -2.750755 |
| 58 | 6  | 0 | -0.116278 | -5.746371 | -2.524945 |
| 59 | 6  | 0 | 0.930477  | -5.438411 | -1.669639 |
| 60 | 6  | 0 | 0.970077  | -4.202914 | -1.044783 |
| 61 | 6  | 0 | -0.042090 | -3.279233 | -1.254103 |
| 62 | 1  | 0 | -1.921493 | -5.061002 | -3.443309 |
| 63 | 1  | 0 | -0.147256 | -6.706951 | -3.026748 |
| 64 | 1  | 0 | 1.720288  | -6.161146 | -1.497401 |
| 65 | 1  | 0 | 1.794893  | -3.952424 | -0.386352 |
| 66 | 1  | 0 | -0.001695 | -2.306690 | -0.769052 |
| 67 | 6  | 0 | 1.639120  | 2.978613  | -1.192490 |
| 68 | 6  | 0 | 1.860495  | 4.292976  | -0.820613 |
| 69 | 6  | 0 | 2.662811  | 4.581347  | 0.274789  |
| 70 | 6  | 0 | 3.253122  | 3.548875  | 0.984976  |
| 71 | 6  | 0 | 3.035637  | 2.230819  | 0.610954  |
| 72 | 1  | 0 | 1.013685  | 2.746585  | -2.047363 |
| 73 | 1  | 0 | 1.406297  | 5.098010  | -1.388377 |
| 74 | 1  | 0 | 2.833742  | 5.611186  | 0.567718  |
| 75 | 1  | 0 | 3.890747  | 3.769116  | 1.834310  |
| 76 | 1  | 0 | 3.503375  | 1.419535  | 1.156905  |
| 77 | 35 | 0 | -2.639567 | -2.350273 | 0.848583  |

---

## 24 Int. D

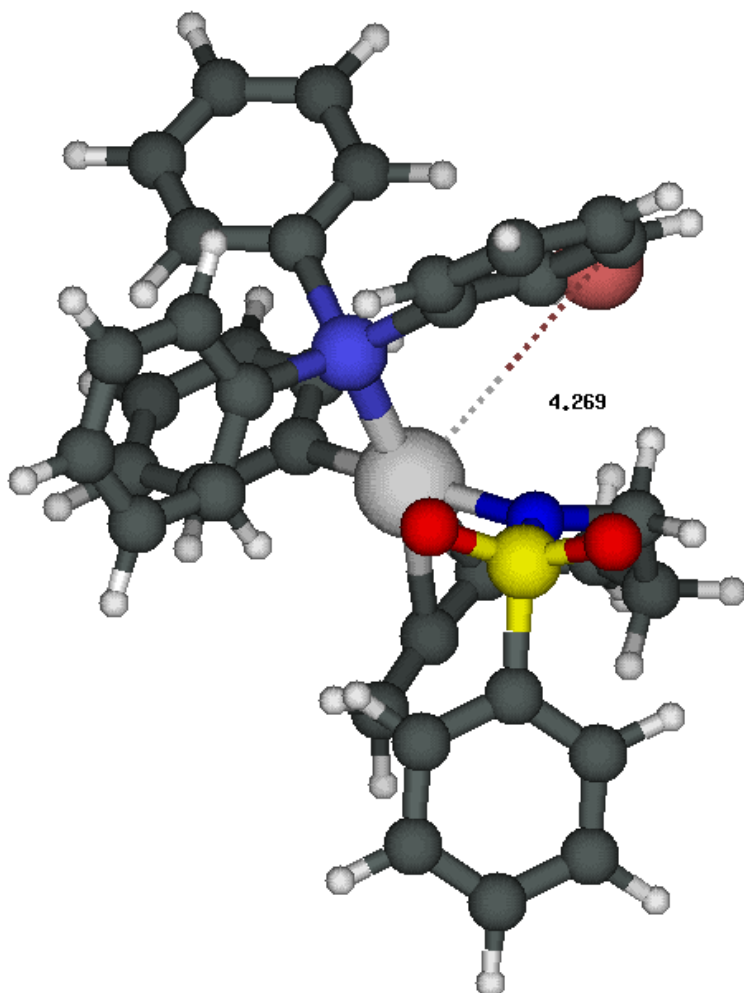


---

|    |    |   |           |           |           |
|----|----|---|-----------|-----------|-----------|
| 1  | 7  | 0 | 0.114202  | 0.012973  | -0.136668 |
| 2  | 6  | 0 | 0.081510  | -0.129967 | 1.312481  |
| 3  | 16 | 0 | 1.509636  | 0.065981  | -0.853742 |
| 4  | 6  | 0 | -0.480046 | 1.074483  | 2.049916  |
| 5  | 1  | 0 | -0.545240 | -1.000519 | 1.562557  |
| 6  | 1  | 0 | 1.084603  | -0.353776 | 1.690036  |
| 7  | 6  | 0 | -1.976219 | 1.247483  | 1.888719  |
| 8  | 1  | 0 | -0.273692 | 0.937221  | 3.116517  |
| 9  | 1  | 0 | 0.051109  | 1.984196  | 1.745085  |
| 10 | 6  | 0 | -2.465451 | 1.774253  | 0.575025  |
| 11 | 1  | 0 | -2.482453 | 0.290320  | 2.076729  |
| 12 | 1  | 0 | -2.356242 | 1.947421  | 2.644825  |
| 13 | 46 | 0 | -1.790246 | 0.326088  | -1.141340 |
| 14 | 6  | 0 | -1.779109 | 2.468494  | -0.331342 |
| 15 | 6  | 0 | 2.083350  | 1.760375  | -0.817499 |
| 16 | 8  | 0 | 2.523029  | -0.681423 | -0.138027 |
| 17 | 8  | 0 | 1.337460  | -0.231892 | -2.255756 |
| 18 | 1  | 0 | -3.547019 | 1.748946  | 0.443533  |
| 19 | 6  | 0 | -1.190776 | 3.356600  | -1.078204 |
| 20 | 1  | 0 | -1.167637 | 4.400839  | -0.773931 |
| 21 | 1  | 0 | -0.709919 | 3.104229  | -2.018005 |
| 22 | 15 | 0 | -1.614648 | -1.515974 | -2.566821 |
| 23 | 6  | 0 | -3.181741 | -2.399437 | -2.902512 |
| 24 | 6  | 0 | -1.011873 | -1.069744 | -4.220162 |
| 25 | 6  | 0 | -0.506542 | -2.789086 | -1.881434 |



|    |    |   |           |           |           |
|----|----|---|-----------|-----------|-----------|
| 26 | 6  | 0 | -3.606714 | 0.632768  | -1.976000 |
| 27 | 6  | 0 | -4.731703 | 0.054312  | -1.390458 |
| 28 | 6  | 0 | -5.998471 | 0.304549  | -1.899128 |
| 29 | 6  | 0 | -6.161865 | 1.130608  | -3.002700 |
| 30 | 6  | 0 | -5.049007 | 1.712017  | -3.587210 |
| 31 | 6  | 0 | -3.779174 | 1.467160  | -3.074327 |
| 32 | 1  | 0 | -4.613423 | -0.606842 | -0.530461 |
| 33 | 1  | 0 | -6.864843 | -0.153753 | -1.431582 |
| 34 | 1  | 0 | -7.152071 | 1.321108  | -3.402144 |
| 35 | 1  | 0 | -5.163824 | 2.363053  | -4.448172 |
| 36 | 1  | 0 | -2.921744 | 1.935725  | -3.550723 |
| 37 | 6  | 0 | -3.943220 | -2.083588 | -4.026608 |
| 38 | 6  | 0 | -5.180600 | -2.669943 | -4.227485 |
| 39 | 6  | 0 | -5.682029 | -3.573781 | -3.303966 |
| 40 | 6  | 0 | -4.938501 | -3.882489 | -2.177771 |
| 41 | 6  | 0 | -3.698417 | -3.299049 | -1.975188 |
| 42 | 1  | 0 | -3.574864 | -1.368725 | -4.754146 |
| 43 | 1  | 0 | -5.756937 | -2.413802 | -5.109588 |
| 44 | 1  | 0 | -6.652277 | -4.031689 | -3.460445 |
| 45 | 1  | 0 | -5.326185 | -4.576681 | -1.440204 |
| 46 | 1  | 0 | -3.160951 | -3.526336 | -1.061604 |
| 47 | 6  | 0 | -0.940718 | -2.006805 | -5.249274 |
| 48 | 6  | 0 | -0.488775 | -1.634624 | -6.503086 |
| 49 | 6  | 0 | -0.112874 | -0.321992 | -6.743908 |
| 50 | 6  | 0 | -0.188054 | 0.617303  | -5.728763 |
| 51 | 6  | 0 | -0.633844 | 0.243537  | -4.472135 |
| 52 | 1  | 0 | -1.246830 | -3.033337 | -5.073461 |
| 53 | 1  | 0 | -0.434029 | -2.371793 | -7.296011 |
| 54 | 1  | 0 | 0.236658  | -0.030799 | -7.728125 |
| 55 | 1  | 0 | 0.101993  | 1.645432  | -5.914125 |
| 56 | 1  | 0 | -0.681843 | 0.972297  | -3.668491 |
| 57 | 6  | 0 | 0.529690  | -3.374212 | -2.598103 |
| 58 | 6  | 0 | 1.360017  | -4.302964 | -1.991531 |
| 59 | 6  | 0 | 1.163435  | -4.655942 | -0.666391 |
| 60 | 6  | 0 | 0.134470  | -4.070427 | 0.054229  |
| 61 | 6  | 0 | -0.690988 | -3.135025 | -0.545124 |
| 62 | 1  | 0 | 0.714280  | -3.093622 | -3.628179 |
| 63 | 1  | 0 | 2.169137  | -4.748605 | -2.559393 |
| 64 | 1  | 0 | 1.817205  | -5.380809 | -0.194118 |
| 65 | 1  | 0 | -0.025067 | -4.330411 | 1.095808  |
| 66 | 1  | 0 | -1.477282 | -2.666876 | 0.046811  |
| 67 | 6  | 0 | 2.024739  | 2.541901  | -1.960461 |
| 68 | 6  | 0 | 2.410037  | 3.873153  | -1.908926 |
| 69 | 6  | 0 | 2.850346  | 4.423773  | -0.717213 |
| 70 | 6  | 0 | 2.917456  | 3.637258  | 0.424573  |
| 71 | 6  | 0 | 2.539666  | 2.307187  | 0.375570  |
| 72 | 1  | 0 | 1.676706  | 2.101149  | -2.888289 |
| 73 | 1  | 0 | 2.366281  | 4.481108  | -2.805845 |
| 74 | 1  | 0 | 3.150573  | 5.464734  | -0.677204 |
| 75 | 1  | 0 | 3.273258  | 4.061951  | 1.356599  |
| 76 | 1  | 0 | 2.603489  | 1.689831  | 1.265287  |
| 77 | 35 | 0 | -3.610539 | -2.278532 | 1.709568  |

---

## 25 Int. E

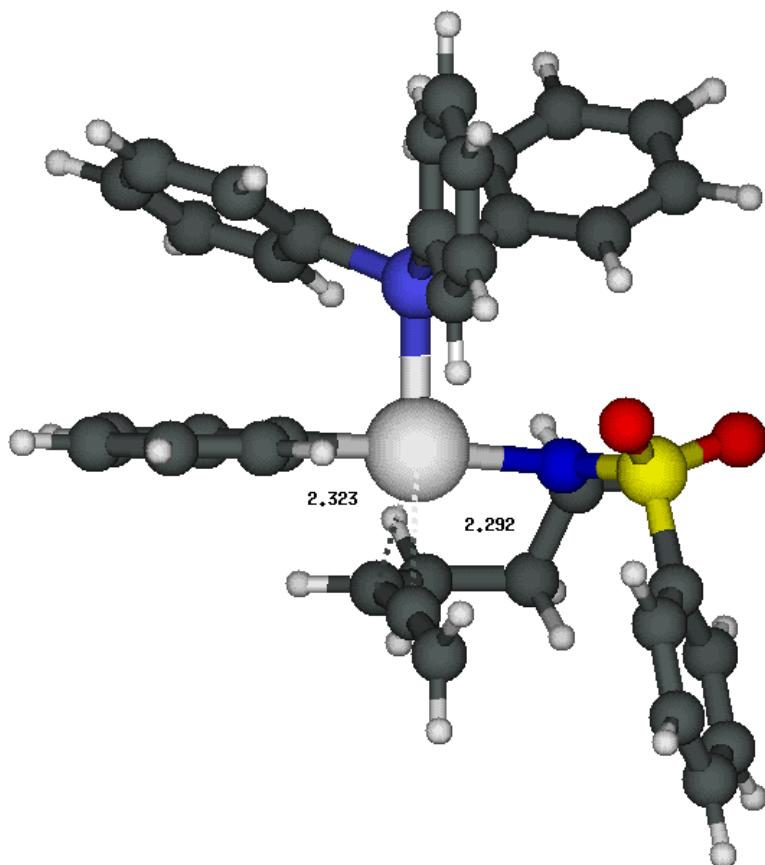


---

|    |    |   |           |           |           |
|----|----|---|-----------|-----------|-----------|
| 1  | 7  | 0 | 0.035520  | 0.018065  | 0.004422  |
| 2  | 6  | 0 | -0.003072 | 0.053598  | 1.455430  |
| 3  | 16 | 0 | 1.419617  | 0.015756  | -0.738251 |
| 4  | 6  | 0 | -0.495247 | 1.372503  | 2.028965  |
| 5  | 1  | 0 | -0.678416 | -0.747629 | 1.798791  |
| 6  | 1  | 0 | 0.982506  | -0.182356 | 1.872083  |
| 7  | 6  | 0 | -1.955388 | 1.672662  | 1.762991  |
| 8  | 1  | 0 | -0.354546 | 1.341207  | 3.114119  |
| 9  | 1  | 0 | 0.127240  | 2.194143  | 1.658191  |
| 10 | 6  | 0 | -2.356069 | 2.068531  | 0.374057  |
| 11 | 1  | 0 | -2.573103 | 0.814711  | 2.061165  |
| 12 | 1  | 0 | -2.284697 | 2.498361  | 2.406956  |
| 13 | 46 | 0 | -1.880137 | 0.244860  | -0.983988 |
| 14 | 6  | 0 | -1.607516 | 2.494982  | -0.643847 |
| 15 | 6  | 0 | 2.071415  | 1.679615  | -0.830613 |
| 16 | 8  | 0 | 2.429843  | -0.708096 | 0.004718  |
| 17 | 8  | 0 | 1.197540  | -0.375954 | -2.112483 |
| 18 | 1  | 0 | -3.430440 | 2.194013  | 0.241583  |
| 19 | 6  | 0 | -0.982586 | 3.154997  | -1.573783 |
| 20 | 1  | 0 | -0.806526 | 4.223633  | -1.470248 |
| 21 | 1  | 0 | -0.610496 | 2.677709  | -2.475115 |
| 22 | 15 | 0 | -2.204802 | -2.019729 | -1.499419 |
| 23 | 6  | 0 | -3.944240 | -2.474614 | -1.237908 |
| 24 | 6  | 0 | -1.779448 | -2.480570 | -3.202795 |
| 25 | 6  | 0 | -1.244749 | -3.235927 | -0.526606 |
| 26 | 6  | 0 | -3.645064 | 0.582500  | -1.925707 |
| 27 | 6  | 0 | -4.863483 | 0.598490  | -1.252622 |
| 28 | 6  | 0 | -6.045664 | 0.885266  | -1.919804 |
| 29 | 6  | 0 | -6.031034 | 1.167126  | -3.277719 |
| 30 | 6  | 0 | -4.823177 | 1.174314  | -3.955038 |

|    |   |   |           |           |           |
|----|---|---|-----------|-----------|-----------|
| 31 | 6 | 0 | -3.639747 | 0.888645  | -3.282964 |
| 32 | 1 | 0 | -4.904171 | 0.370992  | -0.190748 |
| 33 | 1 | 0 | -6.983465 | 0.885658  | -1.372992 |
| 34 | 1 | 0 | -6.954730 | 1.385424  | -3.802120 |
| 35 | 1 | 0 | -4.794574 | 1.403320  | -5.015514 |
| 36 | 1 | 0 | -2.707534 | 0.904877  | -3.840022 |
| 37 | 6 | 0 | -4.800939 | -2.802430 | -2.281336 |
| 38 | 6 | 0 | -6.147089 | -3.026021 | -2.035503 |
| 39 | 6 | 0 | -6.646856 | -2.930659 | -0.748192 |
| 40 | 6 | 0 | -5.799991 | -2.593619 | 0.297061  |
| 41 | 6 | 0 | -4.461124 | -2.352427 | 0.051230  |
| 42 | 1 | 0 | -4.427244 | -2.872711 | -3.296845 |
| 43 | 1 | 0 | -6.806447 | -3.276665 | -2.858711 |
| 44 | 1 | 0 | -7.698905 | -3.110599 | -0.558497 |
| 45 | 1 | 0 | -6.186911 | -2.503039 | 1.305612  |
| 46 | 1 | 0 | -3.812456 | -2.044313 | 0.868199  |
| 47 | 6 | 0 | -1.955471 | -3.788650 | -3.651900 |
| 48 | 6 | 0 | -1.591217 | -4.135093 | -4.939303 |
| 49 | 6 | 0 | -1.037354 | -3.183177 | -5.783880 |
| 50 | 6 | 0 | -0.841189 | -1.888196 | -5.336965 |
| 51 | 6 | 0 | -1.208971 | -1.537683 | -4.047332 |
| 52 | 1 | 0 | -2.377366 | -4.538966 | -2.989537 |
| 53 | 1 | 0 | -1.734143 | -5.152551 | -5.284829 |
| 54 | 1 | 0 | -0.749841 | -3.457948 | -6.792517 |
| 55 | 1 | 0 | -0.394241 | -1.147766 | -5.990378 |
| 56 | 1 | 0 | -1.027569 | -0.533561 | -3.678061 |
| 57 | 6 | 0 | -1.819468 | -4.178812 | 0.319366  |
| 58 | 6 | 0 | -1.022860 | -5.083205 | 1.004455  |
| 59 | 6 | 0 | 0.351929  | -5.059110 | 0.850135  |
| 60 | 6 | 0 | 0.930633  | -4.130803 | -0.001584 |
| 61 | 6 | 0 | 0.139985  | -3.225986 | -0.685902 |
| 62 | 1 | 0 | -2.893856 | -4.227641 | 0.444759  |
| 63 | 1 | 0 | -1.486133 | -5.813421 | 1.658345  |
| 64 | 1 | 0 | 0.972880  | -5.766811 | 1.387706  |
| 65 | 1 | 0 | 2.006366  | -4.108788 | -0.135285 |
| 66 | 1 | 0 | 0.602894  | -2.505532 | -1.352482 |
| 67 | 6 | 0 | 2.142061  | 2.340068  | -2.045968 |
| 68 | 6 | 0 | 2.624603  | 3.639050  | -2.100535 |
| 69 | 6 | 0 | 3.031623  | 4.278475  | -0.942170 |
| 70 | 6 | 0 | 2.974108  | 3.610191  | 0.272861  |
| 71 | 6 | 0 | 2.503322  | 2.310656  | 0.329341  |
| 72 | 1 | 0 | 1.817182  | 1.833289  | -2.946643 |
| 73 | 1 | 0 | 2.680716  | 4.152082  | -3.054160 |
| 74 | 1 | 0 | 3.404567  | 5.295528  | -0.984547 |
| 75 | 1 | 0 | 3.306705  | 4.101998  | 1.180048  |
| 76 | 1 | 0 | 2.476723  | 1.784416  | 1.277442  |

---

## 26 Int. F

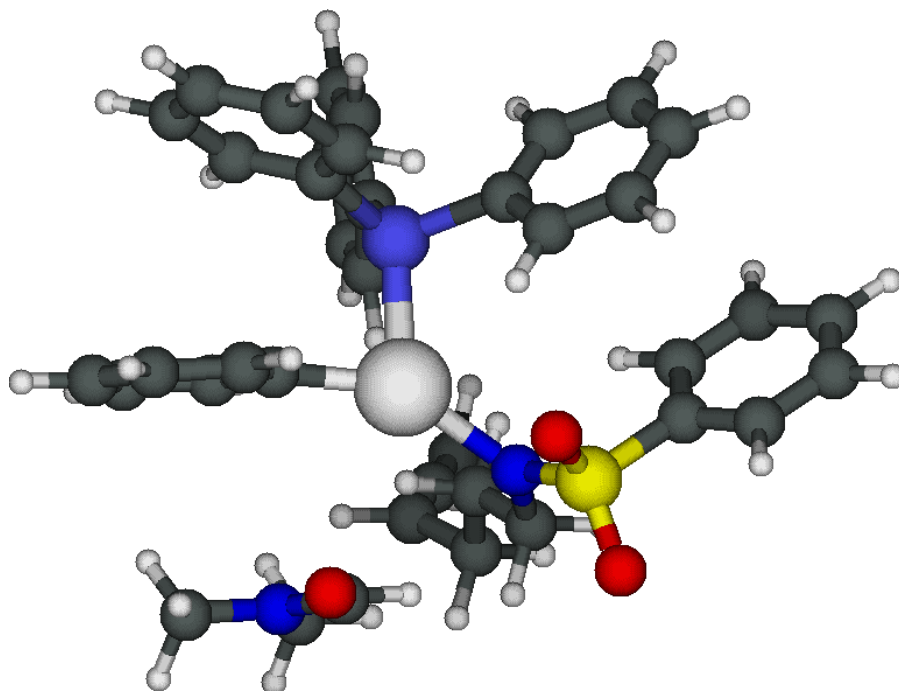


---

|    |    |   |           |           |           |
|----|----|---|-----------|-----------|-----------|
| 1  | 46 | 0 | -0.091713 | 0.114904  | 0.112142  |
| 2  | 15 | 0 | 0.050262  | 0.079172  | 2.350336  |
| 3  | 8  | 0 | 2.283019  | -0.030616 | -3.374292 |
| 4  | 6  | 0 | -1.241384 | -0.925721 | 3.128681  |
| 5  | 6  | 0 | -1.248993 | -1.151759 | 4.504944  |
| 6  | 6  | 0 | -2.276453 | -1.873983 | 5.083681  |
| 7  | 6  | 0 | -3.302606 | -2.378547 | 4.298659  |
| 8  | 6  | 0 | -3.298566 | -2.163787 | 2.931355  |
| 9  | 6  | 0 | -2.269724 | -1.441995 | 2.348679  |
| 10 | 1  | 0 | -0.451951 | -0.759492 | 5.128278  |
| 11 | 1  | 0 | -2.276029 | -2.043910 | 6.154109  |
| 12 | 1  | 0 | -4.105220 | -2.944935 | 4.757084  |
| 13 | 1  | 0 | -4.094627 | -2.560698 | 2.310725  |
| 14 | 1  | 0 | -2.256301 | -1.282735 | 1.275656  |
| 15 | 6  | 0 | 1.607568  | -0.434224 | 3.140659  |
| 16 | 6  | 0 | 2.652731  | 0.469729  | 3.295915  |
| 17 | 6  | 0 | 3.878984  | 0.045011  | 3.781008  |
| 18 | 6  | 0 | 4.072766  | -1.283874 | 4.116341  |
| 19 | 6  | 0 | 3.033356  | -2.189584 | 3.969136  |
| 20 | 6  | 0 | 1.809557  | -1.770353 | 3.480834  |
| 21 | 1  | 0 | 2.521265  | 1.513337  | 3.033893  |
| 22 | 1  | 0 | 4.684973  | 0.760405  | 3.897203  |
| 23 | 1  | 0 | 5.032976  | -1.615156 | 4.494853  |
| 24 | 1  | 0 | 3.176341  | -3.231751 | 4.231375  |
| 25 | 1  | 0 | 1.011543  | -2.494047 | 3.356192  |
| 26 | 6  | 0 | -0.215863 | 1.797196  | 2.895332  |
| 27 | 6  | 0 | -1.058150 | 2.130572  | 3.952332  |
| 28 | 6  | 0 | -1.189995 | 3.452693  | 4.344744  |
| 29 | 6  | 0 | -0.484150 | 4.449942  | 3.691608  |
| 30 | 6  | 0 | 0.344125  | 4.126127  | 2.629164  |
| 31 | 6  | 0 | 0.468475  | 2.809215  | 2.224173  |
| 32 | 1  | 0 | -1.618316 | 1.365092  | 4.476019  |
| 33 | 1  | 0 | -1.850183 | 3.702152  | 5.167592  |
| 34 | 1  | 0 | -0.591288 | 5.483310  | 4.002117  |
| 35 | 1  | 0 | 0.883743  | 4.902888  | 2.098296  |

|    |    |   |           |           |           |
|----|----|---|-----------|-----------|-----------|
| 36 | 1  | 0 | 1.078661  | 2.570160  | 1.358851  |
| 37 | 6  | 0 | 1.120877  | -0.366502 | -3.256629 |
| 38 | 7  | 0 | 0.663888  | -1.633693 | -3.250079 |
| 39 | 1  | 0 | 0.297848  | 0.366997  | -3.138065 |
| 40 | 6  | 0 | -0.740814 | -1.938723 | -3.168087 |
| 41 | 6  | 0 | 1.559103  | -2.756082 | -3.375268 |
| 42 | 1  | 0 | -1.062112 | -2.504925 | -4.048118 |
| 43 | 1  | 0 | -0.957557 | -2.542077 | -2.278405 |
| 44 | 1  | 0 | -1.319934 | -1.015280 | -3.120039 |
| 45 | 1  | 0 | 1.332507  | -3.327488 | -4.280989 |
| 46 | 1  | 0 | 2.584919  | -2.396497 | -3.427579 |
| 47 | 1  | 0 | 1.453433  | -3.422557 | -2.512841 |
| 48 | 6  | 0 | 1.054983  | -1.498067 | 0.292537  |
| 49 | 6  | 0 | 0.480690  | -2.761432 | 0.348529  |
| 50 | 6  | 0 | 1.284861  | -3.891614 | 0.253786  |
| 51 | 6  | 0 | 2.657246  | -3.763802 | 0.112830  |
| 52 | 6  | 0 | 3.227814  | -2.500127 | 0.054295  |
| 53 | 6  | 0 | 2.432194  | -1.368048 | 0.155854  |
| 54 | 1  | 0 | -0.592170 | -2.878328 | 0.474933  |
| 55 | 1  | 0 | 0.830847  | -4.876099 | 0.298248  |
| 56 | 1  | 0 | 3.282731  | -4.647056 | 0.048604  |
| 57 | 1  | 0 | 4.301309  | -2.391652 | -0.060938 |
| 58 | 1  | 0 | 2.891709  | -0.383632 | 0.133729  |
| 59 | 7  | 0 | -1.198784 | 1.476078  | -1.104422 |
| 60 | 6  | 0 | -2.478749 | 1.130632  | -1.720172 |
| 61 | 6  | 0 | -3.087062 | -0.057772 | -1.017288 |
| 62 | 1  | 0 | -3.188741 | 1.970486  | -1.693039 |
| 63 | 1  | 0 | -2.337778 | 0.893497  | -2.786014 |
| 64 | 6  | 0 | -4.319097 | -0.618219 | -1.703420 |
| 65 | 1  | 0 | -2.327700 | -0.851042 | -0.949274 |
| 66 | 1  | 0 | -3.334786 | 0.216917  | 0.015649  |
| 67 | 6  | 0 | -4.764870 | -1.879288 | -1.028347 |
| 68 | 1  | 0 | -5.128625 | 0.117882  | -1.704596 |
| 69 | 1  | 0 | -4.080243 | -0.835249 | -2.752273 |
| 70 | 6  | 0 | -5.883380 | -2.036444 | -0.384695 |
| 71 | 6  | 0 | -7.000804 | -2.192801 | 0.258629  |
| 72 | 1  | 0 | -4.061047 | -2.713697 | -1.056210 |
| 73 | 1  | 0 | -7.085140 | -1.957118 | 1.316493  |
| 74 | 1  | 0 | -7.895628 | -2.564643 | -0.233365 |
| 75 | 16 | 0 | -0.647641 | 2.917316  | -1.446607 |
| 76 | 6  | 0 | -1.576976 | 4.070684  | -0.444393 |
| 77 | 8  | 0 | 0.723055  | 3.026395  | -1.003757 |
| 78 | 8  | 0 | -0.914912 | 3.301542  | -2.815846 |
| 79 | 6  | 0 | -2.451700 | 3.638765  | 0.539004  |
| 80 | 6  | 0 | -3.134468 | 4.569234  | 1.307916  |
| 81 | 6  | 0 | -2.932253 | 5.923701  | 1.103577  |
| 82 | 6  | 0 | -2.049387 | 6.352455  | 0.122638  |
| 83 | 6  | 0 | -1.375703 | 5.428296  | -0.655963 |
| 84 | 1  | 0 | -2.594275 | 2.576363  | 0.706833  |
| 85 | 1  | 0 | -3.822056 | 4.230414  | 2.074924  |
| 86 | 1  | 0 | -3.463984 | 6.649421  | 1.708556  |
| 87 | 1  | 0 | -1.889019 | 7.412338  | -0.039614 |
| 88 | 1  | 0 | -0.691393 | 5.759356  | -1.430002 |

---

27 TS<sub>G</sub>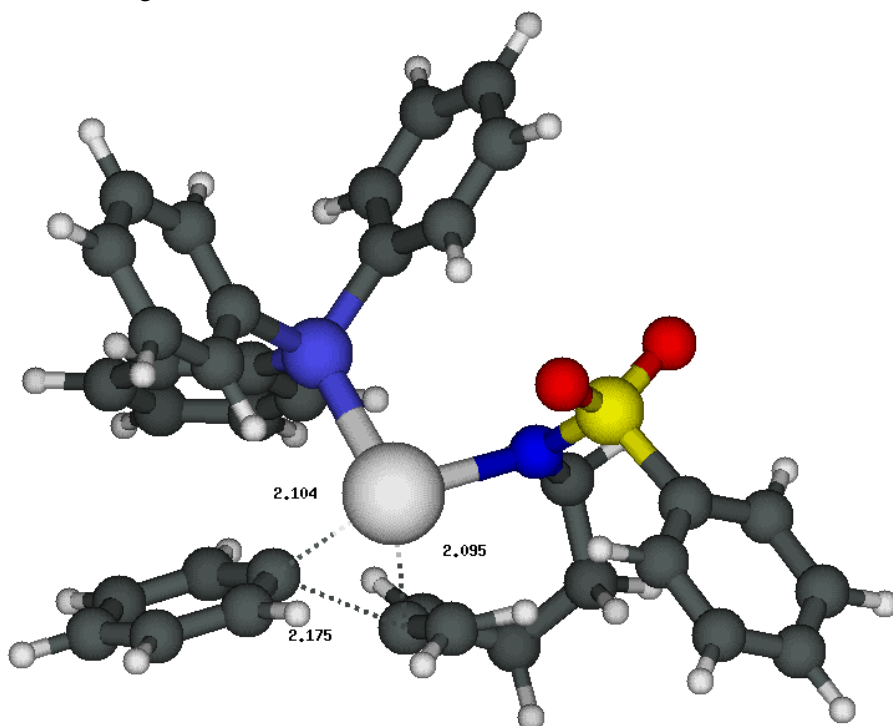


---

|    |    |   |           |           |           |
|----|----|---|-----------|-----------|-----------|
| 1  | 7  | 0 | -0.015262 | -0.019295 | 0.087558  |
| 2  | 6  | 0 | -0.272724 | 0.007635  | 1.531236  |
| 3  | 16 | 0 | 1.477925  | -0.000699 | -0.402178 |
| 4  | 6  | 0 | -0.590019 | 1.382182  | 2.165023  |
| 5  | 1  | 0 | -1.104545 | -0.680988 | 1.735108  |
| 6  | 1  | 0 | 0.590235  | -0.421595 | 2.053270  |
| 7  | 6  | 0 | -2.079322 | 1.770145  | 2.317964  |
| 8  | 1  | 0 | -0.148654 | 1.410985  | 3.166393  |
| 9  | 1  | 0 | -0.069271 | 2.158255  | 1.597432  |
| 10 | 6  | 0 | -2.861856 | 1.327189  | 1.120872  |
| 11 | 1  | 0 | -2.495687 | 1.297304  | 3.210312  |
| 12 | 1  | 0 | -2.145072 | 2.851060  | 2.470947  |
| 13 | 46 | 0 | -1.805588 | 0.212821  | -1.197149 |
| 14 | 6  | 0 | -2.614711 | 1.798771  | -0.093420 |
| 15 | 6  | 0 | 2.148911  | 1.616164  | -0.041478 |
| 16 | 8  | 0 | 2.327944  | -0.910599 | 0.336933  |
| 17 | 8  | 0 | 1.481329  | -0.114396 | -1.843906 |
| 18 | 1  | 0 | -3.485370 | 0.441979  | 1.221331  |
| 19 | 6  | 0 | -1.589040 | 2.359242  | -0.820787 |
| 20 | 1  | 0 | -1.792176 | 3.020870  | -1.656993 |
| 21 | 1  | 0 | -0.589518 | 2.402433  | -0.403679 |
| 22 | 15 | 0 | -2.296189 | -2.105791 | -1.546629 |
| 23 | 6  | 0 | -3.770692 | -2.610349 | -0.607158 |
| 24 | 6  | 0 | -2.643964 | -2.527152 | -3.284034 |
| 25 | 6  | 0 | -1.034175 | -3.346280 | -1.103859 |
| 26 | 6  | 0 | -3.711728 | 0.912210  | -1.748546 |
| 27 | 6  | 0 | -3.737865 | 1.681253  | -2.911957 |
| 28 | 6  | 0 | -4.909400 | 1.818055  | -3.642581 |
| 29 | 6  | 0 | -6.080725 | 1.228363  | -3.198063 |
| 30 | 6  | 0 | -6.074855 | 0.504164  | -2.013707 |
| 31 | 6  | 0 | -4.902546 | 0.349213  | -1.295345 |
| 32 | 1  | 0 | -2.834521 | 2.158228  | -3.277757 |
| 33 | 1  | 0 | -4.903174 | 2.395554  | -4.560798 |
| 34 | 1  | 0 | -6.999246 | 1.344075  | -3.762128 |

|    |   |   |           |           |           |
|----|---|---|-----------|-----------|-----------|
| 35 | 1 | 0 | -6.990932 | 0.054435  | -1.644651 |
| 36 | 1 | 0 | -4.924963 | -0.216587 | -0.369092 |
| 37 | 6 | 0 | -4.957468 | -3.011646 | -1.206226 |
| 38 | 6 | 0 | -6.077498 | -3.275971 | -0.431595 |
| 39 | 6 | 0 | -6.020354 | -3.144128 | 0.944542  |
| 40 | 6 | 0 | -4.836755 | -2.747413 | 1.551383  |
| 41 | 6 | 0 | -3.722312 | -2.477066 | 0.779959  |
| 42 | 1 | 0 | -5.024185 | -3.102524 | -2.284842 |
| 43 | 1 | 0 | -7.000017 | -3.582309 | -0.911672 |
| 44 | 1 | 0 | -6.897638 | -3.348944 | 1.547508  |
| 45 | 1 | 0 | -4.784817 | -2.642476 | 2.629077  |
| 46 | 1 | 0 | -2.803248 | -2.149341 | 1.259746  |
| 47 | 6 | 0 | -2.849027 | -3.847557 | -3.681740 |
| 48 | 6 | 0 | -3.104386 | -4.143195 | -5.007691 |
| 49 | 6 | 0 | -3.151496 | -3.126266 | -5.951281 |
| 50 | 6 | 0 | -2.936088 | -1.814879 | -5.566723 |
| 51 | 6 | 0 | -2.679760 | -1.516988 | -4.236918 |
| 52 | 1 | 0 | -2.810747 | -4.648922 | -2.949785 |
| 53 | 1 | 0 | -3.265436 | -5.172093 | -5.308749 |
| 54 | 1 | 0 | -3.350209 | -3.361752 | -6.990729 |
| 55 | 1 | 0 | -2.960879 | -1.018507 | -6.301961 |
| 56 | 1 | 0 | -2.496273 | -0.491827 | -3.932450 |
| 57 | 6 | 0 | -1.308939 | -4.495711 | -0.370176 |
| 58 | 6 | 0 | -0.312610 | -5.431656 | -0.142556 |
| 59 | 6 | 0 | 0.960608  | -5.231204 | -0.649414 |
| 60 | 6 | 0 | 1.239222  | -4.088303 | -1.382474 |
| 61 | 6 | 0 | 0.249325  | -3.147850 | -1.604782 |
| 62 | 1 | 0 | -2.304844 | -4.672747 | 0.020492  |
| 63 | 1 | 0 | -0.536868 | -6.324398 | 0.430378  |
| 64 | 1 | 0 | 1.738132  | -5.965372 | -0.470648 |
| 65 | 1 | 0 | 2.236798  | -3.920049 | -1.772966 |
| 66 | 1 | 0 | 0.481121  | -2.240581 | -2.155444 |
| 67 | 6 | 0 | 1.957315  | 2.660122  | -0.936382 |
| 68 | 6 | 0 | 2.399887  | 3.932401  | -0.615595 |
| 69 | 6 | 0 | 3.032893  | 4.164413  | 0.596198  |
| 70 | 6 | 0 | 3.234258  | 3.118381  | 1.482730  |
| 71 | 6 | 0 | 2.795885  | 1.843464  | 1.164849  |
| 72 | 1 | 0 | 1.464329  | 2.470999  | -1.883655 |
| 73 | 1 | 0 | 2.253750  | 4.746038  | -1.317202 |
| 74 | 1 | 0 | 3.377666  | 5.161505  | 0.845697  |
| 75 | 1 | 0 | 3.739441  | 3.294483  | 2.425805  |
| 76 | 1 | 0 | 2.954982  | 1.019667  | 1.851263  |

---

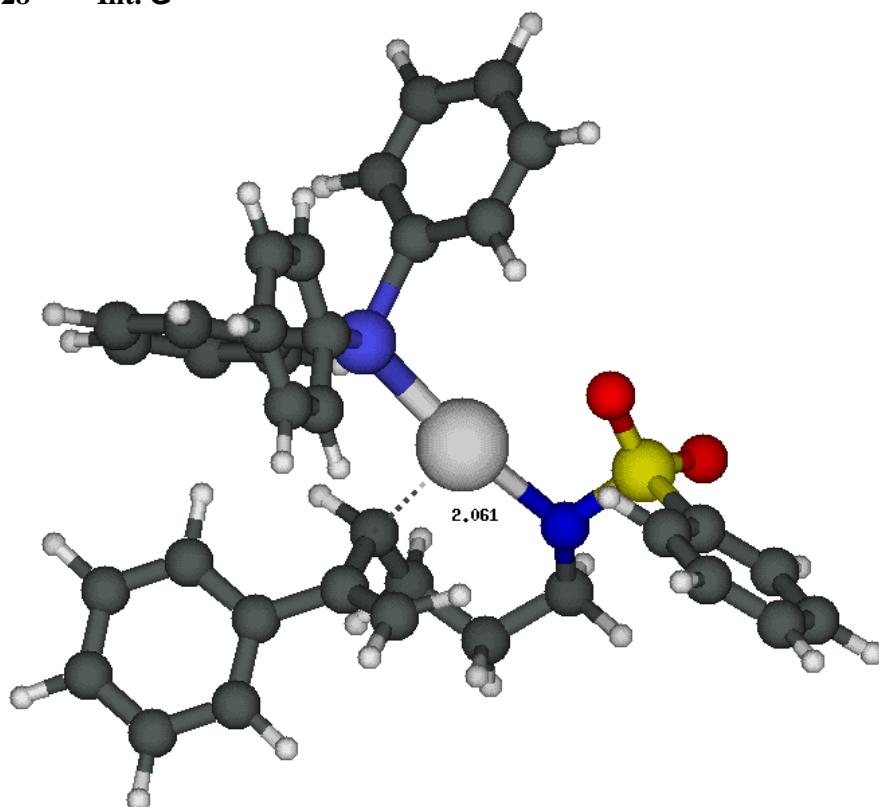


---

|    |    |   |           |           |           |
|----|----|---|-----------|-----------|-----------|
| 1  | 7  | 0 | 0.077646  | -0.164676 | -0.023823 |
| 2  | 6  | 0 | 0.026553  | -0.057176 | 1.417403  |
| 3  | 16 | 0 | 1.448099  | -0.091282 | -0.783654 |
| 4  | 6  | 0 | -1.413798 | -0.022059 | 1.881788  |
| 5  | 1  | 0 | 0.538473  | -0.906123 | 1.893870  |
| 6  | 1  | 0 | 0.539837  | 0.854262  | 1.757027  |
| 7  | 6  | 0 | -2.243271 | -1.198987 | 1.396451  |
| 8  | 1  | 0 | -1.414711 | -0.017372 | 2.975497  |
| 9  | 1  | 0 | -1.880681 | 0.917380  | 1.566781  |
| 10 | 6  | 0 | -2.740420 | -1.185443 | -0.043421 |
| 11 | 1  | 0 | -1.699773 | -2.135509 | 1.573877  |
| 12 | 1  | 0 | -3.148566 | -1.256214 | 2.020568  |
| 13 | 46 | 0 | -1.130859 | -1.270720 | -1.327172 |
| 14 | 6  | 0 | -3.638254 | -0.022376 | -0.331421 |
| 15 | 6  | 0 | 1.774268  | 1.630207  | -1.066847 |
| 16 | 8  | 0 | 2.577722  | -0.601165 | -0.048647 |
| 17 | 8  | 0 | 1.179453  | -0.683425 | -2.093481 |
| 18 | 1  | 0 | -3.284419 | -2.116276 | -0.202992 |
| 19 | 6  | 0 | -3.219746 | 1.171395  | -0.750265 |
| 20 | 1  | 0 | -3.916584 | 1.985990  | -0.918944 |
| 21 | 1  | 0 | -2.173696 | 1.361946  | -0.965140 |
| 22 | 15 | 0 | -2.196706 | -2.631195 | -2.842808 |
| 23 | 6  | 0 | -3.397118 | -3.836929 | -2.199916 |
| 24 | 6  | 0 | -3.045537 | -1.824658 | -4.237076 |
| 25 | 6  | 0 | -0.923993 | -3.644962 | -3.666480 |
| 26 | 6  | 0 | -5.078130 | -0.240088 | -0.040754 |
| 27 | 6  | 0 | -5.793046 | 0.683867  | 0.719500  |
| 28 | 6  | 0 | -7.140890 | 0.499557  | 0.978801  |
| 29 | 6  | 0 | -7.801580 | -0.612039 | 0.481491  |
| 30 | 6  | 0 | -7.101804 | -1.540939 | -0.272544 |
| 31 | 6  | 0 | -5.752349 | -1.361848 | -0.522457 |
| 32 | 1  | 0 | -5.277581 | 1.549491  | 1.122710  |



|    |   |   |           |           |           |
|----|---|---|-----------|-----------|-----------|
| 33 | 1 | 0 | -7.676281 | 1.226660  | 1.579358  |
| 34 | 1 | 0 | -8.856449 | -0.757004 | 0.685210  |
| 35 | 1 | 0 | -7.609448 | -2.412954 | -0.670844 |
| 36 | 1 | 0 | -5.220750 | -2.094555 | -1.122512 |
| 37 | 6 | 0 | -4.617694 | -4.090442 | -2.815027 |
| 38 | 6 | 0 | -5.509469 | -4.990770 | -2.252141 |
| 39 | 6 | 0 | -5.188350 | -5.645186 | -1.075532 |
| 40 | 6 | 0 | -3.967952 | -5.405129 | -0.460687 |
| 41 | 6 | 0 | -3.079631 | -4.503265 | -1.017046 |
| 42 | 1 | 0 | -4.887455 | -3.576809 | -3.731295 |
| 43 | 1 | 0 | -6.461042 | -5.177040 | -2.736976 |
| 44 | 1 | 0 | -5.889207 | -6.344710 | -0.634382 |
| 45 | 1 | 0 | -3.710896 | -5.917605 | 0.459218  |
| 46 | 1 | 0 | -2.128778 | -4.305678 | -0.527580 |
| 47 | 6 | 0 | -3.159600 | -2.444643 | -5.479338 |
| 48 | 6 | 0 | -3.842554 | -1.821511 | -6.508589 |
| 49 | 6 | 0 | -4.418752 | -0.576267 | -6.307116 |
| 50 | 6 | 0 | -4.309599 | 0.045649  | -5.074908 |
| 51 | 6 | 0 | -3.622469 | -0.574406 | -4.043619 |
| 52 | 1 | 0 | -2.716206 | -3.422114 | -5.642636 |
| 53 | 1 | 0 | -3.925994 | -2.310215 | -7.472642 |
| 54 | 1 | 0 | -4.951041 | -0.088719 | -7.116004 |
| 55 | 1 | 0 | -4.754859 | 1.021063  | -4.915361 |
| 56 | 1 | 0 | -3.528484 | -0.080657 | -3.080691 |
| 57 | 6 | 0 | -0.956288 | -5.033473 | -3.710212 |
| 58 | 6 | 0 | 0.049523  | -5.733398 | -4.359219 |
| 59 | 6 | 0 | 1.088267  | -5.054025 | -4.971614 |
| 60 | 6 | 0 | 1.124028  | -3.667748 | -4.935113 |
| 61 | 6 | 0 | 0.126785  | -2.967250 | -4.282702 |
| 62 | 1 | 0 | -1.769141 | -5.578414 | -3.242875 |
| 63 | 1 | 0 | 0.015296  | -6.816624 | -4.388424 |
| 64 | 1 | 0 | 1.872606  | -5.603829 | -5.479339 |
| 65 | 1 | 0 | 1.934786  | -3.130814 | -5.414265 |
| 66 | 1 | 0 | 0.162035  | -1.882253 | -4.249884 |
| 67 | 6 | 0 | 1.026107  | 2.311148  | -2.019143 |
| 68 | 6 | 0 | 1.230709  | 3.665107  | -2.205947 |
| 69 | 6 | 0 | 2.171686  | 4.339197  | -1.439537 |
| 70 | 6 | 0 | 2.910255  | 3.657014  | -0.488394 |
| 71 | 6 | 0 | 2.714708  | 2.297357  | -0.298938 |
| 72 | 1 | 0 | 0.293384  | 1.776464  | -2.614481 |
| 73 | 1 | 0 | 0.655300  | 4.198691  | -2.953730 |
| 74 | 1 | 0 | 2.329320  | 5.401329  | -1.588441 |
| 75 | 1 | 0 | 3.646562  | 4.182202  | 0.109124  |
| 76 | 1 | 0 | 3.294023  | 1.751561  | 0.436173  |

---

29 TS<sub>H</sub>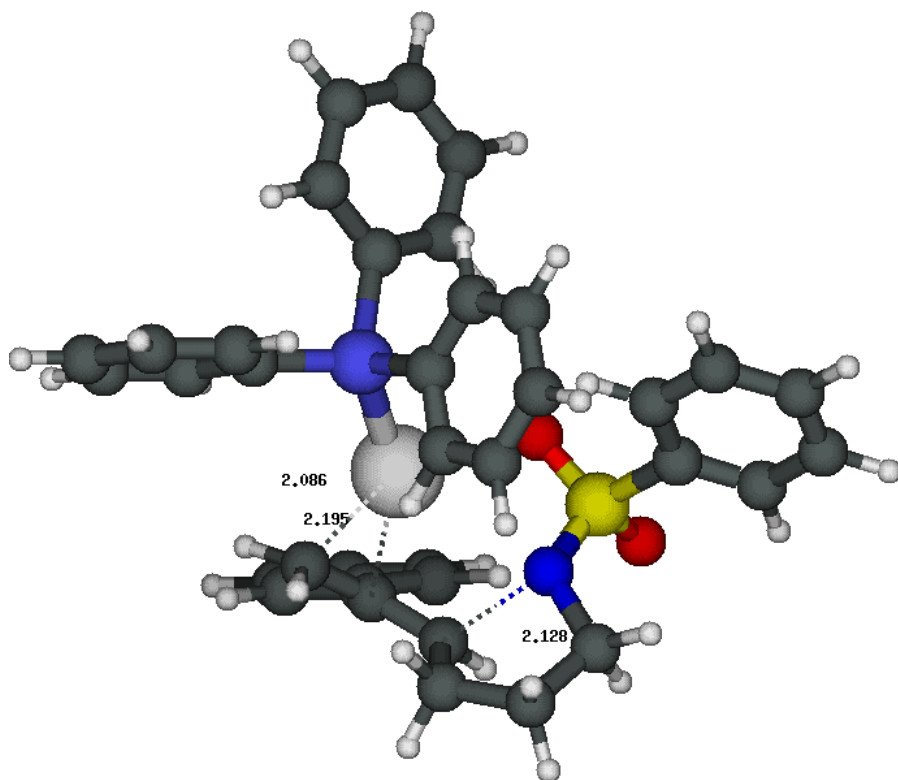


---

|    |    |   |           |           |           |
|----|----|---|-----------|-----------|-----------|
| 1  | 7  | 0 | 0.057809  | -0.065482 | 0.002847  |
| 2  | 6  | 0 | 0.024113  | -0.060163 | 1.451744  |
| 3  | 16 | 0 | 1.478644  | -0.023053 | -0.682497 |
| 4  | 6  | 0 | -1.437435 | -0.253010 | 1.826492  |
| 5  | 1  | 0 | 0.639071  | -0.870508 | 1.871110  |
| 6  | 1  | 0 | 0.409734  | 0.879967  | 1.866857  |
| 7  | 6  | 0 | -2.128766 | -1.101584 | 0.756025  |
| 8  | 1  | 0 | -1.514601 | -0.708078 | 2.815511  |
| 9  | 1  | 0 | -1.936707 | 0.716967  | 1.884275  |
| 10 | 6  | 0 | -1.171575 | -1.796195 | -0.142373 |
| 11 | 1  | 0 | -2.734107 | -1.891607 | 1.217478  |
| 12 | 1  | 0 | -2.819148 | -0.493070 | 0.170945  |
| 13 | 46 | 0 | -1.038766 | -0.545232 | -2.625531 |
| 14 | 6  | 0 | -1.525597 | -2.314339 | -1.421191 |
| 15 | 6  | 0 | 2.102832  | 1.605641  | -0.357311 |
| 16 | 8  | 0 | 2.444630  | -0.956924 | -0.148744 |
| 17 | 8  | 0 | 1.256976  | -0.095028 | -2.125202 |
| 18 | 1  | 0 | -0.389552 | -2.347095 | 0.374541  |
| 19 | 6  | 0 | -2.639108 | -1.792511 | -2.143119 |
| 20 | 1  | 0 | -3.018539 | -2.348850 | -2.994004 |
| 21 | 1  | 0 | -3.402291 | -1.212190 | -1.633250 |
| 22 | 15 | 0 | -1.711606 | 1.189628  | -3.961450 |
| 23 | 6  | 0 | -1.720811 | 2.707643  | -2.947141 |
| 24 | 6  | 0 | -0.668500 | 1.630647  | -5.389605 |
| 25 | 6  | 0 | -3.392030 | 1.109182  | -4.661029 |
| 26 | 6  | 0 | -0.764370 | -3.477471 | -1.951184 |
| 27 | 6  | 0 | 0.596640  | -3.647278 | -1.684864 |
| 28 | 6  | 0 | 1.288801  | -4.741887 | -2.171760 |
| 29 | 6  | 0 | 0.643915  | -5.697997 | -2.940607 |
| 30 | 6  | 0 | -0.705702 | -5.545435 | -3.211079 |
| 31 | 6  | 0 | -1.399893 | -4.452370 | -2.721103 |
| 32 | 1  | 0 | 1.135127  | -2.904047 | -1.104800 |

|    |   |   |           |           |           |
|----|---|---|-----------|-----------|-----------|
| 33 | 1 | 0 | 2.346482  | -4.842983 | -1.953745 |
| 34 | 1 | 0 | 1.187930  | -6.554219 | -3.322721 |
| 35 | 1 | 0 | -1.229578 | -6.288604 | -3.802372 |
| 36 | 1 | 0 | -2.461297 | -4.367056 | -2.926263 |
| 37 | 6 | 0 | -1.177185 | 3.916806  | -3.366283 |
| 38 | 6 | 0 | -1.178615 | 5.014895  | -2.518620 |
| 39 | 6 | 0 | -1.727092 | 4.917103  | -1.251098 |
| 40 | 6 | 0 | -2.279300 | 3.716457  | -0.828028 |
| 41 | 6 | 0 | -2.269963 | 2.618261  | -1.668386 |
| 42 | 1 | 0 | -0.744992 | 4.008299  | -4.357477 |
| 43 | 1 | 0 | -0.747757 | 5.951775  | -2.853898 |
| 44 | 1 | 0 | -1.723085 | 5.776096  | -0.589632 |
| 45 | 1 | 0 | -2.710343 | 3.633722  | 0.163431  |
| 46 | 1 | 0 | -2.686532 | 1.672022  | -1.330969 |
| 47 | 6 | 0 | -1.174775 | 2.145875  | -6.577729 |
| 48 | 6 | 0 | -0.316071 | 2.494908  | -7.608122 |
| 49 | 6 | 0 | 1.052060  | 2.339634  | -7.457163 |
| 50 | 6 | 0 | 1.563960  | 1.828819  | -6.274138 |
| 51 | 6 | 0 | 0.707998  | 1.469017  | -5.247971 |
| 52 | 1 | 0 | -2.244343 | 2.279844  | -6.704041 |
| 53 | 1 | 0 | -0.719589 | 2.892632  | -8.532523 |
| 54 | 1 | 0 | 1.721429  | 2.613413  | -8.264856 |
| 55 | 1 | 0 | 2.633924  | 1.702037  | -6.153602 |
| 56 | 1 | 0 | 1.106728  | 1.057362  | -4.323756 |
| 57 | 6 | 0 | -4.288402 | 2.171042  | -4.621370 |
| 58 | 6 | 0 | -5.542583 | 2.047570  | -5.199403 |
| 59 | 6 | 0 | -5.906297 | 0.869283  | -5.829107 |
| 60 | 6 | 0 | -5.015298 | -0.192655 | -5.877178 |
| 61 | 6 | 0 | -3.768911 | -0.075496 | -5.288980 |
| 62 | 1 | 0 | -4.009892 | 3.103237  | -4.140639 |
| 63 | 1 | 0 | -6.236415 | 2.879795  | -5.159702 |
| 64 | 1 | 0 | -6.887220 | 0.775417  | -6.281089 |
| 65 | 1 | 0 | -5.295918 | -1.117523 | -6.368339 |
| 66 | 1 | 0 | -3.073596 | -0.910473 | -5.315918 |
| 67 | 6 | 0 | 1.568541  | 2.682546  | -1.052602 |
| 68 | 6 | 0 | 2.023628  | 3.959554  | -0.780131 |
| 69 | 6 | 0 | 2.997431  | 4.159817  | 0.188126  |
| 70 | 6 | 0 | 3.517702  | 3.082253  | 0.884812  |
| 71 | 6 | 0 | 3.070984  | 1.798159  | 0.614558  |
| 72 | 1 | 0 | 0.804764  | 2.519529  | -1.807624 |
| 73 | 1 | 0 | 1.615811  | 4.802032  | -1.327932 |
| 74 | 1 | 0 | 3.351395  | 5.162499  | 0.399008  |
| 75 | 1 | 0 | 4.277945  | 3.238418  | 1.641435  |
| 76 | 1 | 0 | 3.475274  | 0.945897  | 1.147873  |

---

30 Int. H

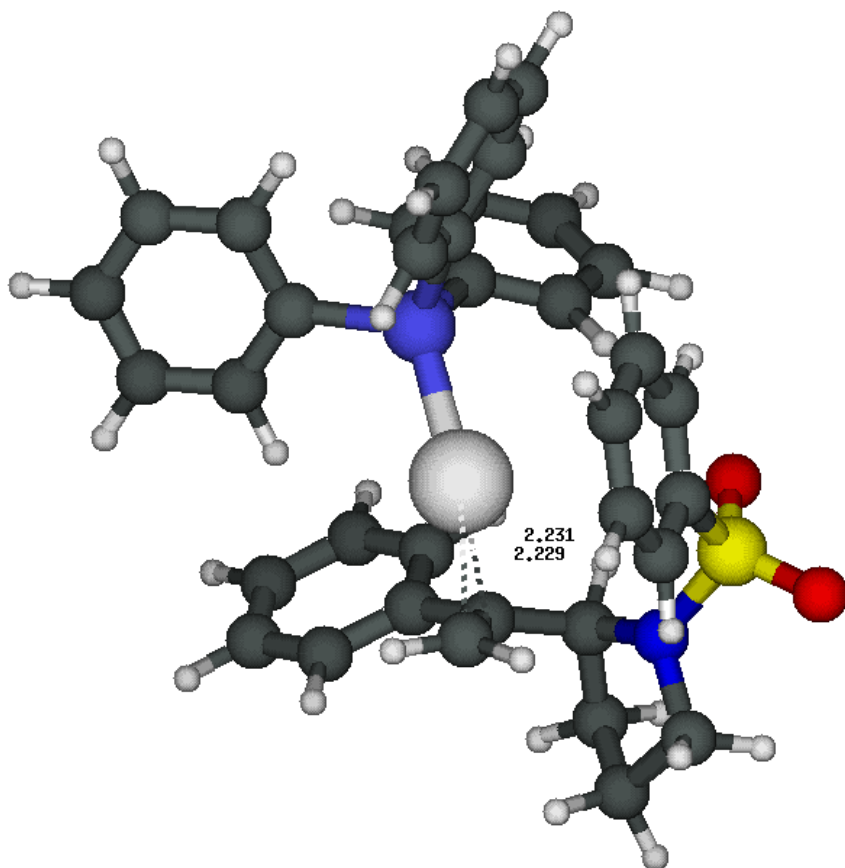


---

|    |    |   |           |           |           |
|----|----|---|-----------|-----------|-----------|
| 1  | 7  | 0 | -0.124542 | -0.817921 | -0.155044 |
| 2  | 6  | 0 | -0.167136 | -1.075280 | 1.300208  |
| 3  | 16 | 0 | 1.243228  | -1.055535 | -1.000859 |
| 4  | 6  | 0 | -1.651294 | -1.218561 | 1.590750  |
| 5  | 1  | 0 | 0.371593  | -1.996271 | 1.529906  |
| 6  | 1  | 0 | 0.299268  | -0.258174 | 1.856710  |
| 7  | 6  | 0 | -2.224068 | -1.710767 | 0.274445  |
| 8  | 1  | 0 | -1.833743 | -1.902626 | 2.419458  |
| 9  | 1  | 0 | -2.087381 | -0.251461 | 1.854341  |
| 10 | 6  | 0 | -1.460388 | -0.879543 | -0.761292 |
| 11 | 1  | 0 | -1.982611 | -2.766736 | 0.124566  |
| 12 | 1  | 0 | -3.305277 | -1.592445 | 0.197460  |
| 13 | 46 | 0 | -1.116816 | 1.708167  | -2.522468 |
| 14 | 6  | 0 | -2.120735 | 0.474604  | -0.957379 |
| 15 | 6  | 0 | 1.872010  | 0.550107  | -1.399551 |
| 16 | 8  | 0 | 2.190862  | -1.651642 | -0.102886 |
| 17 | 8  | 0 | 0.932386  | -1.713946 | -2.236920 |
| 18 | 1  | 0 | -1.393082 | -1.401609 | -1.716485 |
| 19 | 6  | 0 | -1.628866 | 1.604854  | -0.355707 |
| 20 | 1  | 0 | -2.226636 | 2.506143  | -0.266395 |
| 21 | 1  | 0 | -0.735133 | 1.557400  | 0.256245  |
| 22 | 15 | 0 | -1.059270 | 2.103441  | -4.794349 |
| 23 | 6  | 0 | -2.428869 | 3.166394  | -5.374835 |
| 24 | 6  | 0 | 0.406833  | 2.868335  | -5.568004 |
| 25 | 6  | 0 | -1.306512 | 0.555319  | -5.736344 |
| 26 | 6  | 0 | -3.471116 | 0.444279  | -1.580471 |
| 27 | 6  | 0 | -3.759467 | -0.428737 | -2.635211 |
| 28 | 6  | 0 | -4.999043 | -0.422970 | -3.247716 |
| 29 | 6  | 0 | -5.992412 | 0.442776  | -2.814104 |

|    |   |   |           |           |           |
|----|---|---|-----------|-----------|-----------|
| 30 | 6 | 0 | -5.732059 | 1.292156  | -1.750899 |
| 31 | 6 | 0 | -4.490604 | 1.287942  | -1.137695 |
| 32 | 1 | 0 | -2.994872 | -1.101875 | -3.007749 |
| 33 | 1 | 0 | -5.187975 | -1.098584 | -4.075072 |
| 34 | 1 | 0 | -6.964111 | 0.447226  | -3.294513 |
| 35 | 1 | 0 | -6.504805 | 1.960840  | -1.387611 |
| 36 | 1 | 0 | -4.309005 | 1.950137  | -0.298230 |
| 37 | 6 | 0 | -2.359476 | 3.938965  | -6.530004 |
| 38 | 6 | 0 | -3.452404 | 4.685758  | -6.939172 |
| 39 | 6 | 0 | -4.627453 | 4.660923  | -6.204669 |
| 40 | 6 | 0 | -4.707028 | 3.891205  | -5.054779 |
| 41 | 6 | 0 | -3.610857 | 3.154912  | -4.638878 |
| 42 | 1 | 0 | -1.447895 | 3.955265  | -7.119537 |
| 43 | 1 | 0 | -3.386622 | 5.287517  | -7.838735 |
| 44 | 1 | 0 | -5.481181 | 5.246393  | -6.526953 |
| 45 | 1 | 0 | -5.621876 | 3.871641  | -4.472532 |
| 46 | 1 | 0 | -3.661907 | 2.566041  | -3.724877 |
| 47 | 6 | 0 | 1.109508  | 2.309328  | -6.628164 |
| 48 | 6 | 0 | 2.240903  | 2.939945  | -7.127267 |
| 49 | 6 | 0 | 2.671378  | 4.136561  | -6.580568 |
| 50 | 6 | 0 | 1.971277  | 4.703946  | -5.524665 |
| 51 | 6 | 0 | 0.854656  | 4.067645  | -5.016057 |
| 52 | 1 | 0 | 0.777635  | 1.376978  | -7.073235 |
| 53 | 1 | 0 | 2.783526  | 2.492785  | -7.952668 |
| 54 | 1 | 0 | 3.553879  | 4.627971  | -6.974216 |
| 55 | 1 | 0 | 2.305533  | 5.639091  | -5.089157 |
| 56 | 1 | 0 | 0.320889  | 4.501373  | -4.173382 |
| 57 | 6 | 0 | -2.172473 | 0.440090  | -6.818017 |
| 58 | 6 | 0 | -2.331557 | -0.778535 | -7.461285 |
| 59 | 6 | 0 | -1.621649 | -1.889329 | -7.038138 |
| 60 | 6 | 0 | -0.751196 | -1.782146 | -5.963326 |
| 61 | 6 | 0 | -0.601933 | -0.570477 | -5.313162 |
| 62 | 1 | 0 | -2.736184 | 1.300602  | -7.162757 |
| 63 | 1 | 0 | -3.015920 | -0.857131 | -8.298649 |
| 64 | 1 | 0 | -1.750215 | -2.840921 | -7.541510 |
| 65 | 1 | 0 | -0.194975 | -2.648322 | -5.621837 |
| 66 | 1 | 0 | 0.058943  | -0.497313 | -4.453650 |
| 67 | 6 | 0 | 2.229654  | 0.851762  | -2.703229 |
| 68 | 6 | 0 | 2.779222  | 2.092899  | -2.984855 |
| 69 | 6 | 0 | 2.948479  | 3.023233  | -1.974452 |
| 70 | 6 | 0 | 2.590646  | 2.710791  | -0.669741 |
| 71 | 6 | 0 | 2.061870  | 1.468083  | -0.375923 |
| 72 | 1 | 0 | 2.085011  | 0.121383  | -3.490393 |
| 73 | 1 | 0 | 3.063411  | 2.335558  | -4.002853 |
| 74 | 1 | 0 | 3.365272  | 3.998058  | -2.202853 |
| 75 | 1 | 0 | 2.730037  | 3.437381  | 0.122127  |
| 76 | 1 | 0 | 1.787361  | 1.216014  | 0.643322  |

---

31 Int. TS<sub>i</sub>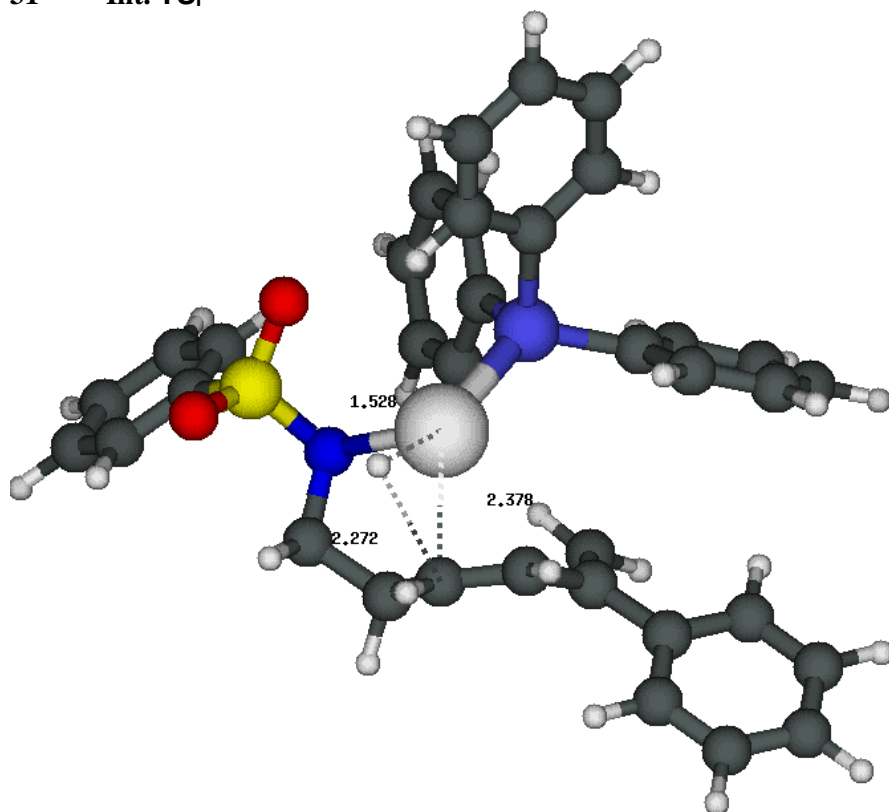


---

|    |    |   |           |           |           |
|----|----|---|-----------|-----------|-----------|
| 1  | 7  | 0 | 0.040965  | -0.042783 | -0.043950 |
| 2  | 6  | 0 | 0.014510  | -0.004180 | 1.417943  |
| 3  | 16 | 0 | 1.492699  | -0.017784 | -0.705607 |
| 4  | 6  | 0 | -1.384143 | -0.311611 | 1.944646  |
| 5  | 1  | 0 | 0.720492  | -0.726274 | 1.852819  |
| 6  | 1  | 0 | 0.309172  | 0.992824  | 1.773411  |
| 7  | 6  | 0 | -1.826734 | -1.690703 | 1.577270  |
| 8  | 1  | 0 | -1.341599 | -0.245084 | 3.038653  |
| 9  | 1  | 0 | -2.087684 | 0.447604  | 1.599126  |
| 10 | 6  | 0 | -3.033831 | -2.127566 | 1.111435  |
| 11 | 1  | 0 | -0.260493 | -2.364223 | 0.075980  |
| 12 | 1  | 0 | -1.146352 | -2.472504 | 1.908782  |
| 13 | 46 | 0 | -1.294563 | -1.587571 | -0.737642 |
| 14 | 6  | 0 | -4.301320 | -1.382055 | 1.001415  |
| 15 | 6  | 0 | 2.005803  | 1.669145  | -0.472249 |
| 16 | 8  | 0 | 2.463273  | -0.840336 | -0.018700 |
| 17 | 8  | 0 | 1.353929  | -0.221344 | -2.125875 |
| 18 | 1  | 0 | -3.146101 | -3.208377 | 1.066194  |
| 19 | 6  | 0 | -4.422126 | -0.147381 | 0.509200  |
| 20 | 1  | 0 | -5.370021 | 0.379007  | 0.519438  |
| 21 | 1  | 0 | -3.579686 | 0.373878  | 0.074448  |
| 22 | 15 | 0 | -2.478382 | -0.542067 | -2.646992 |
| 23 | 6  | 0 | -4.298030 | -0.593485 | -2.773340 |
| 24 | 6  | 0 | -2.050958 | 1.193728  | -3.014189 |
| 25 | 6  | 0 | -1.959098 | -1.471506 | -4.129839 |
| 26 | 6  | 0 | -5.493639 | -2.099457 | 1.517321  |
| 27 | 6  | 0 | -5.093793 | 0.520318  | -3.004341 |
| 28 | 6  | 0 | -6.475387 | 0.393738  | -3.055522 |
| 29 | 6  | 0 | -7.068783 | -0.845315 | -2.891421 |
| 30 | 6  | 0 | -6.278586 | -1.964018 | -2.663556 |
| 31 | 6  | 0 | -4.904639 | -1.836177 | -2.593781 |
| 32 | 1  | 0 | -4.642424 | 1.496575  | -3.146694 |

|    |   |   |           |           |           |
|----|---|---|-----------|-----------|-----------|
| 33 | 1 | 0 | -7.087412 | 1.270772  | -3.233983 |
| 34 | 1 | 0 | -8.147588 | -0.942577 | -2.936959 |
| 35 | 1 | 0 | -6.738023 | -2.936783 | -2.527215 |
| 36 | 1 | 0 | -4.289675 | -2.711409 | -2.395701 |
| 37 | 6 | 0 | -1.632318 | 1.623339  | -4.268906 |
| 38 | 6 | 0 | -1.319297 | 2.956663  | -4.485896 |
| 39 | 6 | 0 | -1.430084 | 3.875983  | -3.456363 |
| 40 | 6 | 0 | -1.843665 | 3.456812  | -2.201185 |
| 41 | 6 | 0 | -2.140556 | 2.123748  | -1.979419 |
| 42 | 1 | 0 | -1.544705 | 0.917220  | -5.087536 |
| 43 | 1 | 0 | -0.991043 | 3.276709  | -5.468416 |
| 44 | 1 | 0 | -1.187589 | 4.918600  | -3.628904 |
| 45 | 1 | 0 | -1.922321 | 4.168440  | -1.386819 |
| 46 | 1 | 0 | -2.443557 | 1.803833  | -0.986758 |
| 47 | 6 | 0 | -2.732196 | -1.530999 | -5.286941 |
| 48 | 6 | 0 | -2.291709 | -2.247044 | -6.386187 |
| 49 | 6 | 0 | -1.075460 | -2.911576 | -6.341551 |
| 50 | 6 | 0 | -0.298641 | -2.855521 | -5.196496 |
| 51 | 6 | 0 | -0.737891 | -2.139158 | -4.094761 |
| 52 | 1 | 0 | -3.684119 | -1.011032 | -5.332007 |
| 53 | 1 | 0 | -2.900512 | -2.285891 | -7.282457 |
| 54 | 1 | 0 | -0.733866 | -3.474970 | -7.202621 |
| 55 | 1 | 0 | 0.652740  | -3.373882 | -5.157795 |
| 56 | 1 | 0 | -0.122890 | -2.082966 | -3.199869 |
| 57 | 6 | 0 | 1.487136  | 2.648238  | -1.308870 |
| 58 | 6 | 0 | 1.842268  | 3.970447  | -1.115651 |
| 59 | 6 | 0 | 2.709133  | 4.314814  | -0.087820 |
| 60 | 6 | 0 | 3.220437  | 3.334872  | 0.746182  |
| 61 | 6 | 0 | 2.869174  | 2.006775  | 0.557207  |
| 62 | 1 | 0 | 0.811423  | 2.369860  | -2.110910 |
| 63 | 1 | 0 | 1.441837  | 4.735570  | -1.771882 |
| 64 | 1 | 0 | 2.986997  | 5.352045  | 0.061180  |
| 65 | 1 | 0 | 3.898394  | 3.602472  | 1.548604  |
| 66 | 1 | 0 | 3.268154  | 1.231150  | 1.200486  |
| 67 | 6 | 0 | -6.749067 | -1.920836 | 0.934813  |
| 68 | 6 | 0 | -7.864331 | -2.570115 | 1.433115  |
| 69 | 6 | 0 | -7.750893 | -3.417217 | 2.524441  |
| 70 | 6 | 0 | -6.510838 | -3.609306 | 3.110675  |
| 71 | 6 | 0 | -5.394570 | -2.961987 | 2.609068  |
| 72 | 1 | 0 | -6.848061 | -1.277217 | 0.066673  |
| 73 | 1 | 0 | -8.828092 | -2.420581 | 0.958938  |
| 74 | 1 | 0 | -8.624341 | -3.928961 | 2.912360  |
| 75 | 1 | 0 | -6.409867 | -4.266935 | 3.966893  |
| 76 | 1 | 0 | -4.432704 | -3.113556 | 3.087594  |

---

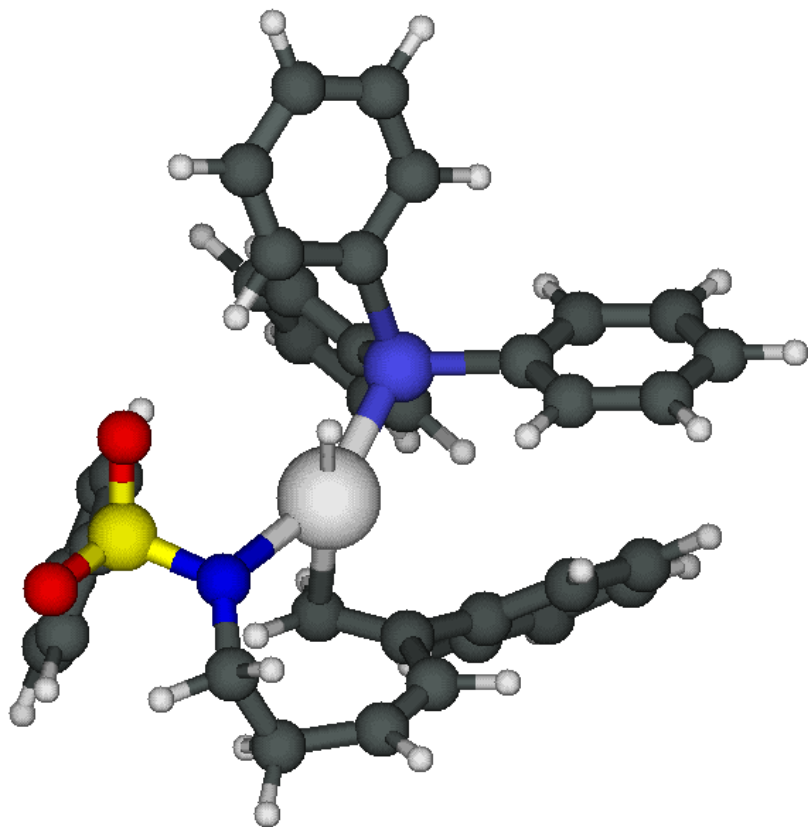


---

|    |    |   |           |           |           |
|----|----|---|-----------|-----------|-----------|
| 1  | 7  | 0 | 0.032692  | -0.010994 | -0.046102 |
| 2  | 6  | 0 | 0.039191  | 0.041371  | 1.405207  |
| 3  | 16 | 0 | 1.413602  | -0.007031 | -0.815250 |
| 4  | 6  | 0 | -0.689594 | 1.244703  | 2.007073  |
| 5  | 1  | 0 | -0.429139 | -0.869784 | 1.804958  |
| 6  | 1  | 0 | 1.070079  | 0.041801  | 1.769362  |
| 7  | 6  | 0 | -2.161738 | 1.095594  | 1.898150  |
| 8  | 1  | 0 | -0.428404 | 1.279151  | 3.069422  |
| 9  | 1  | 0 | -0.321891 | 2.170344  | 1.558094  |
| 10 | 6  | 0 | -3.020543 | 1.560965  | 0.986354  |
| 11 | 1  | 0 | -2.602952 | 0.474506  | 2.675766  |
| 12 | 46 | 0 | -1.647374 | 0.288361  | -1.417275 |
| 13 | 6  | 0 | -2.805986 | 2.419623  | -0.184064 |
| 14 | 6  | 0 | 1.609568  | 1.651595  | -1.443628 |
| 15 | 8  | 0 | 2.530059  | -0.233368 | 0.076052  |
| 16 | 8  | 0 | 1.345517  | -0.845256 | -1.989309 |
| 17 | 1  | 0 | -4.061141 | 1.297521  | 1.148607  |
| 18 | 6  | 0 | -1.614771 | 2.715643  | -0.760467 |
| 19 | 1  | 0 | -1.586607 | 3.370508  | -1.625047 |
| 20 | 1  | 0 | -0.661008 | 2.445425  | -0.332480 |
| 21 | 15 | 0 | -2.794759 | 0.135393  | -3.371779 |
| 22 | 6  | 0 | -4.593415 | -0.086251 | -3.254934 |
| 23 | 6  | 0 | -2.499817 | 1.626087  | -4.378030 |
| 24 | 6  | 0 | -2.248713 | -1.209713 | -4.480507 |
| 25 | 6  | 0 | -4.037439 | 3.046111  | -0.730129 |
| 26 | 6  | 0 | -4.020358 | 4.385373  | -1.118156 |
| 27 | 6  | 0 | -5.148972 | 4.986314  | -1.647209 |
| 28 | 6  | 0 | -6.317257 | 4.257682  | -1.804139 |
| 29 | 6  | 0 | -6.353301 | 2.930109  | -1.407310 |
| 30 | 6  | 0 | -5.228449 | 2.334632  | -0.863515 |



|    |   |   |           |           |           |
|----|---|---|-----------|-----------|-----------|
| 31 | 1 | 0 | -3.112236 | 4.964845  | -0.991737 |
| 32 | 1 | 0 | -5.115769 | 6.030979  | -1.935456 |
| 33 | 1 | 0 | -7.200548 | 4.726054  | -2.223138 |
| 34 | 1 | 0 | -7.261949 | 2.349223  | -1.523238 |
| 35 | 1 | 0 | -5.274295 | 1.291704  | -0.570806 |
| 36 | 6 | 0 | -5.493253 | 0.459070  | -4.165631 |
| 37 | 6 | 0 | -6.850848 | 0.223911  | -4.026906 |
| 38 | 6 | 0 | -7.318804 | -0.563787 | -2.986997 |
| 39 | 6 | 0 | -6.426963 | -1.118973 | -2.082969 |
| 40 | 6 | 0 | -5.070587 | -0.876541 | -2.213060 |
| 41 | 1 | 0 | -5.136903 | 1.072101  | -4.986603 |
| 42 | 1 | 0 | -7.545956 | 0.657100  | -4.737055 |
| 43 | 1 | 0 | -8.382381 | -0.744801 | -2.880421 |
| 44 | 1 | 0 | -6.788845 | -1.735399 | -1.268105 |
| 45 | 1 | 0 | -4.372250 | -1.292090 | -1.491514 |
| 46 | 6 | 0 | -1.534247 | 1.627873  | -5.381656 |
| 47 | 6 | 0 | -1.237034 | 2.795647  | -6.065897 |
| 48 | 6 | 0 | -1.894623 | 3.973610  | -5.753613 |
| 49 | 6 | 0 | -2.853621 | 3.981357  | -4.752110 |
| 50 | 6 | 0 | -3.153266 | 2.817018  | -4.067554 |
| 51 | 1 | 0 | -1.007071 | 0.714847  | -5.637266 |
| 52 | 1 | 0 | -0.486723 | 2.780962  | -6.848304 |
| 53 | 1 | 0 | -1.661760 | 4.885884  | -6.290867 |
| 54 | 1 | 0 | -3.375869 | 4.898804  | -4.503214 |
| 55 | 1 | 0 | -3.903965 | 2.837333  | -3.284949 |
| 56 | 6 | 0 | -3.050419 | -1.610525 | -5.545841 |
| 57 | 6 | 0 | -2.605213 | -2.575984 | -6.431620 |
| 58 | 6 | 0 | -1.349999 | -3.141342 | -6.269977 |
| 59 | 6 | 0 | -0.542723 | -2.738309 | -5.219903 |
| 60 | 6 | 0 | -0.989032 | -1.778316 | -4.325198 |
| 61 | 1 | 0 | -4.031828 | -1.170552 | -5.688969 |
| 62 | 1 | 0 | -3.242076 | -2.887466 | -7.251722 |
| 63 | 1 | 0 | -1.001971 | -3.897916 | -6.964121 |
| 64 | 1 | 0 | 0.441355  | -3.174605 | -5.091042 |
| 65 | 1 | 0 | -0.348491 | -1.466158 | -3.503955 |
| 66 | 6 | 0 | 1.186697  | 1.971577  | -2.724982 |
| 67 | 6 | 0 | 1.238176  | 3.287508  | -3.157214 |
| 68 | 6 | 0 | 1.711678  | 4.279614  | -2.313276 |
| 69 | 6 | 0 | 2.142417  | 3.954250  | -1.035427 |
| 70 | 6 | 0 | 2.091373  | 2.641394  | -0.598437 |
| 71 | 1 | 0 | 0.816469  | 1.189686  | -3.380277 |
| 72 | 1 | 0 | 0.907002  | 3.536300  | -4.160099 |
| 73 | 1 | 0 | 1.751558  | 5.308111  | -2.653483 |
| 74 | 1 | 0 | 2.521833  | 4.726921  | -0.376298 |
| 75 | 1 | 0 | 2.423692  | 2.381030  | 0.401008  |
| 76 | 1 | 0 | -1.547893 | -1.208674 | -1.733311 |

---

33 [H-Pd<sup>0</sup>-Br (DMF)(PPh<sub>3</sub>)] V

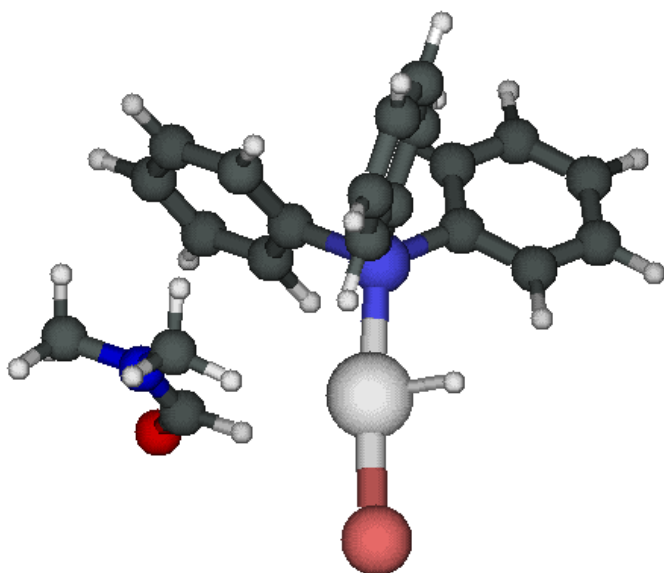


---

|    |    |   |           |           |           |
|----|----|---|-----------|-----------|-----------|
| 1  | 15 | 0 | 0.024125  | -0.046572 | -0.002796 |
| 2  | 46 | 0 | -0.005039 | -0.077857 | 2.265732  |
| 3  | 35 | 0 | 0.247201  | -0.119317 | 4.727315  |
| 4  | 6  | 0 | -1.668452 | 0.080452  | -0.648469 |
| 5  | 6  | 0 | -2.559907 | -0.940437 | -0.322619 |
| 6  | 6  | 0 | -3.867437 | -0.893274 | -0.767372 |
| 7  | 6  | 0 | -4.302533 | 0.182212  | -1.527782 |
| 8  | 6  | 0 | -3.426843 | 1.208579  | -1.839608 |
| 9  | 6  | 0 | -2.111775 | 1.160795  | -1.403100 |
| 10 | 1  | 0 | -2.223806 | -1.778545 | 0.282348  |
| 11 | 1  | 0 | -4.552117 | -1.694003 | -0.512799 |
| 12 | 1  | 0 | -5.329514 | 0.221992  | -1.872760 |
| 13 | 1  | 0 | -3.765345 | 2.052713  | -2.429692 |
| 14 | 1  | 0 | -1.433909 | 1.968690  | -1.657417 |
| 15 | 6  | 0 | 0.919065  | 1.367732  | -0.705907 |
| 16 | 6  | 0 | 1.343471  | 1.381725  | -2.031512 |
| 17 | 6  | 0 | 1.974577  | 2.500459  | -2.546039 |
| 18 | 6  | 0 | 2.182593  | 3.612332  | -1.744147 |
| 19 | 6  | 0 | 1.762247  | 3.604747  | -0.424540 |
| 20 | 6  | 0 | 1.135567  | 2.484143  | 0.094531  |
| 21 | 1  | 0 | 1.179439  | 0.517407  | -2.667173 |
| 22 | 1  | 0 | 2.306242  | 2.504225  | -3.577969 |
| 23 | 1  | 0 | 2.678887  | 4.486614  | -2.149826 |
| 24 | 1  | 0 | 1.928533  | 4.470631  | 0.205892  |
| 25 | 1  | 0 | 0.814521  | 2.466637  | 1.132521  |
| 26 | 6  | 0 | 0.724906  | -1.511654 | -0.821901 |
| 27 | 6  | 0 | 0.213736  | -1.991920 | -2.024951 |
| 28 | 6  | 0 | 0.802412  | -3.078927 | -2.648057 |
| 29 | 6  | 0 | 1.906492  | -3.692945 | -2.079776 |
| 30 | 6  | 0 | 2.422177  | -3.219037 | -0.884382 |
| 31 | 6  | 0 | 1.831481  | -2.137061 | -0.255480 |
| 32 | 1  | 0 | -0.646686 | -1.515330 | -2.482623 |
| 33 | 1  | 0 | 0.395455  | -3.446591 | -3.583045 |
| 34 | 1  | 0 | 2.363956  | -4.546125 | -2.567626 |
| 35 | 1  | 0 | 3.282867  | -3.699149 | -0.433185 |
| 36 | 1  | 0 | 2.229275  | -1.778309 | 0.688750  |
| 37 | 1  | 0 | 1.495289  | -0.192242 | 2.048208  |
| 38 | 6  | 0 | -3.324929 | 0.435289  | 2.563451  |

|    |   |   |           |           |          |
|----|---|---|-----------|-----------|----------|
| 39 | 8 | 0 | -4.194896 | -0.392685 | 2.721368 |
| 40 | 7 | 0 | -3.465366 | 1.661611  | 2.034222 |
| 41 | 6 | 0 | -2.379906 | 2.605774  | 1.964210 |
| 42 | 6 | 0 | -4.751815 | 2.131780  | 1.577892 |
| 43 | 1 | 0 | -1.469167 | 2.170851  | 2.385641 |
| 44 | 1 | 0 | -2.181837 | 2.891591  | 0.925526 |
| 45 | 1 | 0 | -2.623922 | 3.510649  | 2.529313 |
| 46 | 1 | 0 | -5.464192 | 1.309055  | 1.584050 |
| 47 | 1 | 0 | -5.122278 | 2.931798  | 2.226641 |
| 48 | 1 | 0 | -4.663629 | 2.526290  | 0.561812 |
| 49 | 1 | 0 | -2.271099 | 0.243418  | 2.882754 |

---

### 34 P<sub>H</sub>

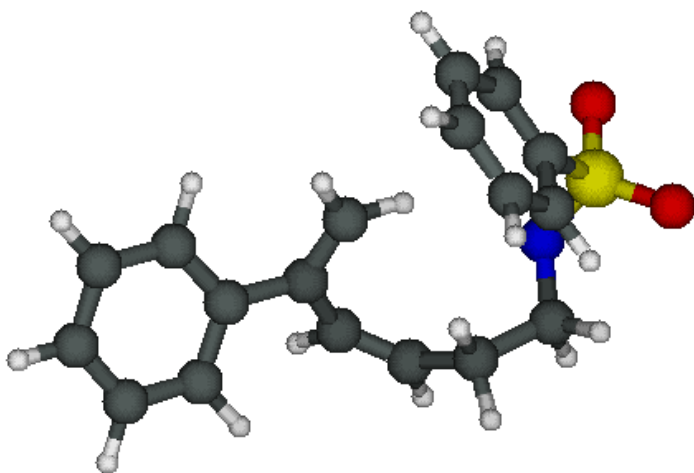


---

|    |    |   |           |           |           |
|----|----|---|-----------|-----------|-----------|
| 1  | 7  | 0 | 0.035929  | -0.026913 | 0.073516  |
| 2  | 6  | 0 | 0.063108  | 0.081557  | 1.516635  |
| 3  | 16 | 0 | 1.384078  | -0.090660 | -0.683251 |
| 4  | 6  | 0 | -0.568509 | 1.370435  | 2.043972  |
| 5  | 1  | 0 | -0.501052 | -0.757766 | 1.954607  |
| 6  | 1  | 0 | 1.078681  | -0.003177 | 1.926917  |
| 7  | 6  | 0 | -2.025399 | 1.454149  | 1.759612  |
| 8  | 1  | 0 | -0.438226 | 1.370146  | 3.134806  |
| 9  | 1  | 0 | -0.031529 | 2.239210  | 1.653297  |
| 10 | 6  | 0 | -2.702269 | 2.380808  | 1.081799  |
| 11 | 1  | 0 | -2.612457 | 0.648465  | 2.201957  |
| 12 | 6  | 0 | -2.163657 | 3.556647  | 0.379249  |
| 13 | 1  | 0 | -3.787801 | 2.292229  | 1.060153  |
| 14 | 6  | 0 | -1.125508 | 3.458042  | -0.455172 |
| 15 | 1  | 0 | -0.707828 | 4.324809  | -0.956950 |
| 16 | 1  | 0 | -0.666155 | 2.496502  | -0.661149 |
| 17 | 6  | 0 | -2.849923 | 4.845139  | 0.621967  |
| 18 | 6  | 0 | -2.898698 | 5.841914  | -0.353495 |
| 19 | 6  | 0 | -3.526994 | 7.048779  | -0.107251 |
| 20 | 6  | 0 | -4.128599 | 7.287168  | 1.119458  |
| 21 | 6  | 0 | -4.098400 | 6.304380  | 2.094451  |
| 22 | 6  | 0 | -3.470704 | 5.095365  | 1.845452  |
| 23 | 1  | 0 | -2.454548 | 5.659234  | -1.326128 |
| 24 | 1  | 0 | -3.557670 | 7.805943  | -0.883010 |
| 25 | 1  | 0 | -4.624980 | 8.231922  | 1.310293  |
| 26 | 1  | 0 | -4.566541 | 6.478268  | 3.057047  |
| 27 | 1  | 0 | -3.446744 | 4.335820  | 2.620036  |
| 28 | 6  | 0 | 1.967416  | 1.595587  | -0.892749 |
| 29 | 8  | 0 | 2.463501  | -0.741869 | 0.045967  |

|    |   |   |          |           |           |
|----|---|---|----------|-----------|-----------|
| 30 | 8 | 0 | 1.162657 | -0.565177 | -2.034652 |
| 31 | 6 | 0 | 1.756248 | 2.271663  | -2.085478 |
| 32 | 6 | 0 | 2.131953 | 3.600424  | -2.210261 |
| 33 | 6 | 0 | 2.713409 | 4.263201  | -1.141400 |
| 34 | 6 | 0 | 2.928485 | 3.587790  | 0.051459  |
| 35 | 6 | 0 | 2.561806 | 2.258193  | 0.174842  |
| 36 | 1 | 0 | 1.296707 | 1.747059  | -2.915329 |
| 37 | 1 | 0 | 1.968658 | 4.120480  | -3.148072 |
| 38 | 1 | 0 | 3.006316 | 5.302586  | -1.238522 |
| 39 | 1 | 0 | 3.392990 | 4.098250  | 0.888120  |
| 40 | 1 | 0 | 2.744382 | 1.727139  | 1.102936  |

---

**Pictures and Cartesian coordinates of excited state optimized structures M06/def2-SVP.**

**35 Tosyl Int. E**

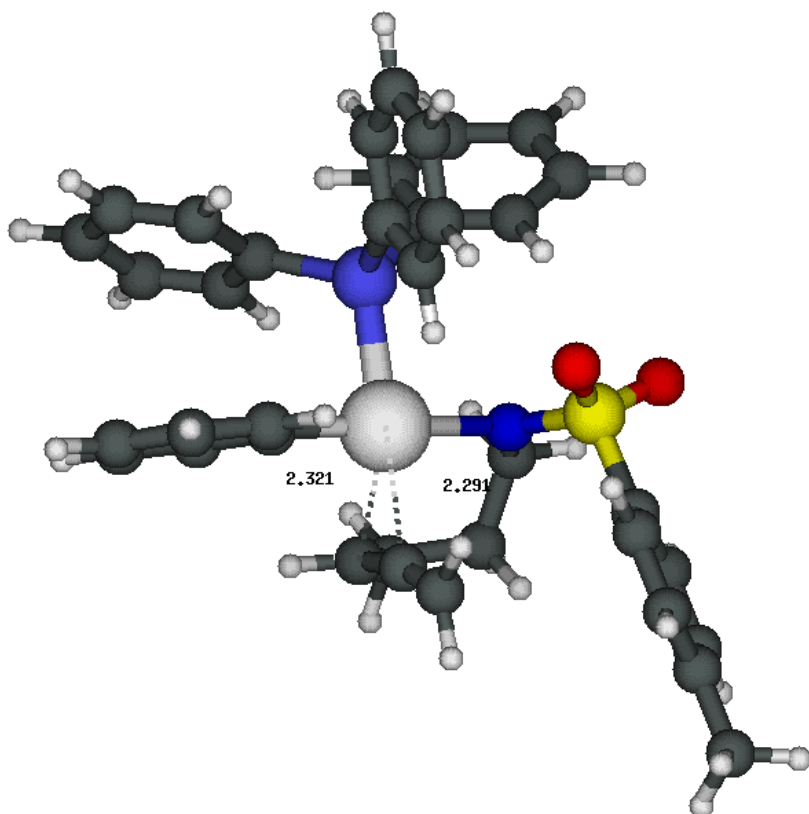

|                                                |        |              |           |           |          |
|------------------------------------------------|--------|--------------|-----------|-----------|----------|
| Excited State                                  | 1:     | Singlet-?Sym | 2.8730 eV | 431.55 nm | f=0.0132 |
|                                                | 163 -> | 166          | -0.02987  |           |          |
|                                                | 165 -> | 166          | 0.70572   |           |          |
| Total Energy, E(TD-HF/TD-DFT) = -2504.65745989 |        |              |           |           |          |
| Excited State                                  | 2:     | Singlet-?Sym | 3.3436 eV | 370.81 nm | f=0.0003 |
| Excited State                                  | 3:     | Singlet-?Sym | 3.5150 eV | 352.73 nm | f=0.0916 |
| Excited State                                  | 4:     | Singlet-?Sym | 3.5308 eV | 351.15 nm | f=0.0152 |
| Excited State                                  | 5:     | Singlet-?Sym | 3.6428 eV | 340.35 nm | f=0.0207 |
| Excited State                                  | 6:     | Singlet-?Sym | 3.7473 eV | 330.86 nm | f=0.0014 |
| Excited State                                  | 7:     | Singlet-?Sym | 3.7903 eV | 327.11 nm | f=0.0045 |
| Excited State                                  | 8:     | Singlet-?Sym | 3.7922 eV | 326.95 nm | f=0.0031 |

**Molecular Orbitals involved in the first electronic transition:**

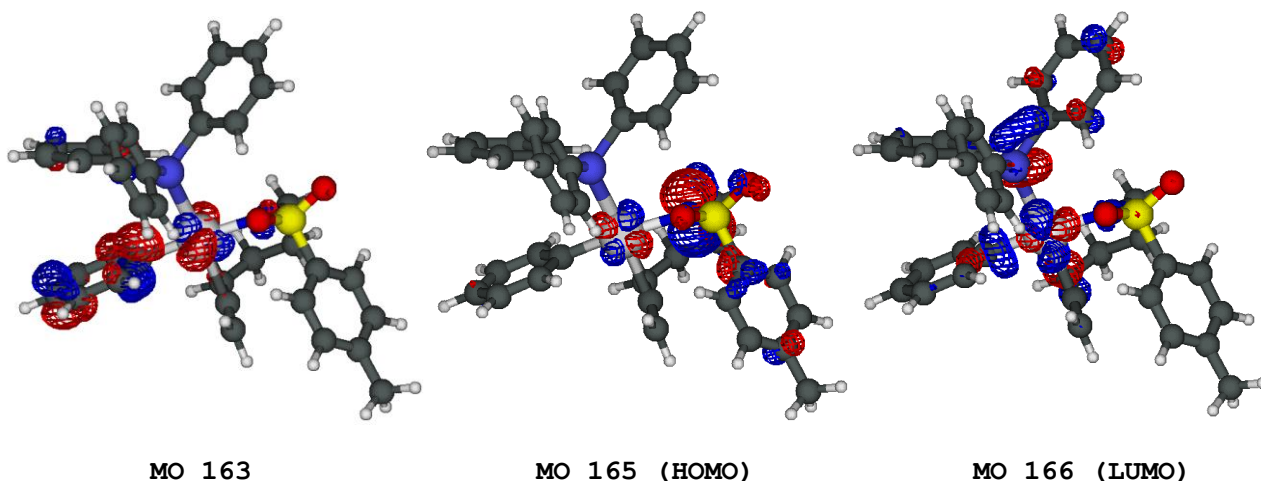

---

|    |    |   |           |           |           |
|----|----|---|-----------|-----------|-----------|
| 1  | 7  | 0 | -0.007088 | -0.003153 | -0.004520 |
| 2  | 6  | 0 | -0.000275 | 0.006427  | 1.447094  |
| 3  | 16 | 0 | 1.355344  | -0.000361 | -0.788544 |
| 4  | 6  | 0 | -0.457960 | 1.320638  | 2.058914  |
| 5  | 1  | 0 | -0.674571 | -0.792743 | 1.797559  |
| 6  | 1  | 0 | 0.994670  | -0.248940 | 1.828759  |
| 7  | 6  | 0 | -1.922220 | 1.642024  | 1.844287  |
| 8  | 1  | 0 | -0.283570 | 1.269095  | 3.138414  |
| 9  | 1  | 0 | 0.162649  | 2.140991  | 1.682062  |
| 10 | 6  | 0 | -2.361238 | 2.068199  | 0.476125  |
| 11 | 1  | 0 | -2.540078 | 0.785455  | 2.146153  |
| 12 | 1  | 0 | -2.221586 | 2.459113  | 2.513374  |
| 13 | 46 | 0 | -1.946400 | 0.268671  | -0.930324 |
| 14 | 6  | 0 | -1.638647 | 2.507665  | -0.554914 |
| 15 | 6  | 0 | 2.030158  | 1.652189  | -0.853145 |
| 16 | 8  | 0 | 2.374402  | -0.762111 | -0.096524 |
| 17 | 8  | 0 | 1.084774  | -0.351053 | -2.165603 |
| 18 | 1  | 0 | -3.437794 | 2.206110  | 0.378577  |
| 19 | 6  | 0 | -1.032246 | 3.178546  | -1.489252 |
| 20 | 1  | 0 | -0.842470 | 4.243286  | -1.371074 |
| 21 | 1  | 0 | -0.689212 | 2.714198  | -2.408665 |
| 22 | 15 | 0 | -2.309583 | -1.979394 | -1.490542 |
| 23 | 6  | 0 | -4.047406 | -2.423985 | -1.199272 |
| 24 | 6  | 0 | -1.931193 | -2.398294 | -3.215910 |
| 25 | 6  | 0 | -1.338454 | -3.228585 | -0.572185 |
| 26 | 6  | 0 | -3.733144 | 0.645035  | -1.814192 |
| 27 | 6  | 0 | -4.930605 | 0.658842  | -1.104276 |
| 28 | 6  | 0 | -6.129292 | 0.972414  | -1.728515 |
| 29 | 6  | 0 | -6.152696 | 1.283413  | -3.079906 |
| 30 | 6  | 0 | -4.965867 | 1.292346  | -3.793535 |
| 31 | 6  | 0 | -3.765766 | 0.979863  | -3.164257 |
| 32 | 1  | 0 | -4.941739 | 0.408988  | -0.046698 |
| 33 | 1  | 0 | -7.050046 | 0.970745  | -1.153435 |
| 34 | 1  | 0 | -7.089329 | 1.522738  | -3.571163 |
| 35 | 1  | 0 | -4.966958 | 1.543769  | -4.849300 |
| 36 | 1  | 0 | -2.850802 | 0.997964  | -3.749200 |
| 37 | 6  | 0 | -4.932543 | -2.714534 | -2.230068 |
| 38 | 6  | 0 | -6.274847 | -2.930511 | -1.958048 |
| 39 | 6  | 0 | -6.742876 | -2.865061 | -0.656995 |
| 40 | 6  | 0 | -5.867572 | -2.566006 | 0.376224  |
| 41 | 6  | 0 | -4.532294 | -2.332266 | 0.104729  |
| 42 | 1  | 0 | -4.583982 | -2.762022 | -3.255719 |
| 43 | 1  | 0 | -6.956330 | -3.151642 | -2.771649 |
| 44 | 1  | 0 | -7.792102 | -3.038846 | -0.447017 |
| 45 | 1  | 0 | -6.229159 | -2.499255 | 1.395959  |
| 46 | 1  | 0 | -3.861306 | -2.053783 | 0.914153  |
| 47 | 6  | 0 | -2.139647 | -3.689922 | -3.697336 |
| 48 | 6  | 0 | -1.814806 | -4.004682 | -5.003365 |
| 49 | 6  | 0 | -1.268324 | -3.037274 | -5.834949 |
| 50 | 6  | 0 | -1.038831 | -1.759223 | -5.356245 |
| 51 | 6  | 0 | -1.366690 | -1.440353 | -4.047711 |
| 52 | 1  | 0 | -2.555908 | -4.452824 | -3.045865 |
| 53 | 1  | 0 | -1.982906 | -5.009484 | -5.373691 |
| 54 | 1  | 0 | -1.012112 | -3.286878 | -6.858447 |
| 55 | 1  | 0 | -0.596410 | -1.007449 | -5.999742 |
| 56 | 1  | 0 | -1.155225 | -0.451470 | -3.653732 |
| 57 | 6  | 0 | -1.901176 | -4.184779 | 0.266944  |
| 58 | 6  | 0 | -1.096840 | -5.112532 | 0.910479  |

|    |   |   |           |           |           |
|----|---|---|-----------|-----------|-----------|
| 59 | 6 | 0 | 0.273737  | -5.098392 | 0.721324  |
| 60 | 6 | 0 | 0.840197  | -4.156299 | -0.123443 |
| 61 | 6 | 0 | 0.041885  | -3.228226 | -0.766487 |
| 62 | 1 | 0 | -2.972423 | -4.225779 | 0.418988  |
| 63 | 1 | 0 | -1.550873 | -5.852963 | 1.559337  |
| 64 | 1 | 0 | 0.900822  | -5.824482 | 1.226265  |
| 65 | 1 | 0 | 1.912357  | -4.141569 | -0.283961 |
| 66 | 1 | 0 | 0.495514  | -2.496428 | -1.427125 |
| 67 | 6 | 0 | 2.068775  | 2.355102  | -2.043892 |
| 68 | 6 | 0 | 2.574697  | 3.646254  | -2.073073 |
| 69 | 6 | 0 | 3.046150  | 4.258373  | -0.920075 |
| 70 | 6 | 0 | 3.011462  | 3.532416  | 0.270267  |
| 71 | 6 | 0 | 2.518873  | 2.243291  | 0.306699  |
| 72 | 1 | 0 | 1.700255  | 1.889522  | -2.950195 |
| 73 | 1 | 0 | 2.602480  | 4.190064  | -3.012469 |
| 74 | 6 | 0 | 3.598380  | 5.644811  | -0.942448 |
| 75 | 1 | 0 | 3.388644  | 3.989972  | 1.180275  |
| 76 | 1 | 0 | 2.518856  | 1.691344  | 1.240623  |
| 77 | 1 | 0 | 3.456457  | 6.116859  | -1.915736 |
| 78 | 1 | 0 | 3.122595  | 6.272572  | -0.184722 |
| 79 | 1 | 0 | 4.670123  | 5.643492  | -0.723573 |

---

36 Int.  $^1E^*$ 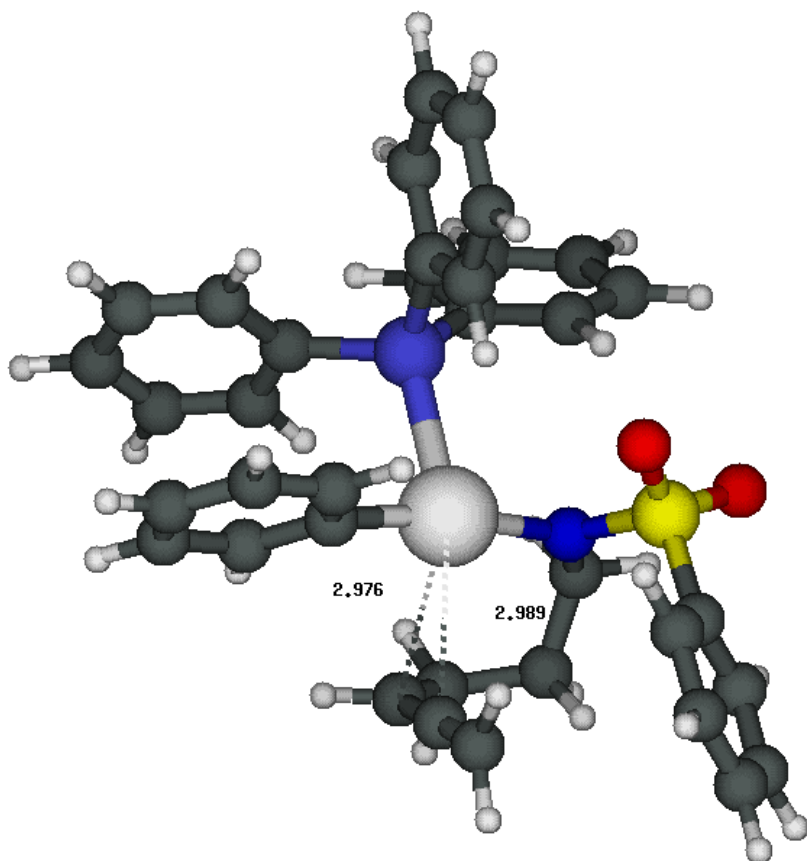


---

|    |    |   |           |           |           |
|----|----|---|-----------|-----------|-----------|
| 1  | 7  | 0 | 0.106899  | 0.011156  | -0.135703 |
| 2  | 6  | 0 | 0.211149  | -0.120661 | 1.307451  |
| 3  | 16 | 0 | 1.525375  | 0.146161  | -0.991577 |
| 4  | 6  | 0 | -0.250681 | 1.085395  | 2.124275  |
| 5  | 1  | 0 | -0.407194 | -0.993765 | 1.602915  |
| 6  | 1  | 0 | 1.250318  | -0.371341 | 1.584374  |
| 7  | 6  | 0 | -1.754116 | 1.300355  | 2.167433  |
| 8  | 1  | 0 | 0.101777  | 0.908608  | 3.154379  |
| 9  | 1  | 0 | 0.269576  | 1.997855  | 1.777959  |
| 10 | 6  | 0 | -2.378623 | 2.070558  | 1.041289  |
| 11 | 1  | 0 | -2.267964 | 0.324087  | 2.253662  |
| 12 | 1  | 0 | -2.019574 | 1.834602  | 3.100142  |
| 13 | 46 | 0 | -1.643622 | 0.234474  | -1.182759 |
| 14 | 6  | 0 | -1.790476 | 2.885453  | 0.191115  |
| 15 | 6  | 0 | 1.946796  | 1.877852  | -0.992068 |
| 16 | 8  | 0 | 2.594959  | -0.575275 | -0.291863 |
| 17 | 8  | 0 | 1.223490  | -0.229393 | -2.376808 |
| 18 | 1  | 0 | -3.476299 | 2.006728  | 0.973790  |
| 19 | 6  | 0 | -1.265452 | 3.731015  | -0.658310 |
| 20 | 1  | 0 | -1.133059 | 4.792238  | -0.405794 |
| 21 | 1  | 0 | -0.945549 | 3.413774  | -1.660711 |
| 22 | 15 | 0 | -2.155394 | -2.236656 | -1.580460 |
| 23 | 6  | 0 | -3.931770 | -2.511643 | -1.277206 |
| 24 | 6  | 0 | -1.826492 | -2.866913 | -3.266236 |
| 25 | 6  | 0 | -1.235443 | -3.415959 | -0.524299 |
| 26 | 6  | 0 | -3.323039 | 0.836057  | -2.236067 |
| 27 | 6  | 0 | -4.590832 | 0.910439  | -1.622978 |
| 28 | 6  | 0 | -5.749128 | 1.168675  | -2.356257 |
| 29 | 6  | 0 | -5.671900 | 1.368967  | -3.736094 |
| 30 | 6  | 0 | -4.429464 | 1.319583  | -4.369813 |



|    |   |   |           |           |           |
|----|---|---|-----------|-----------|-----------|
| 31 | 6 | 0 | -3.275674 | 1.059843  | -3.627698 |
| 32 | 1 | 0 | -4.686131 | 0.744501  | -0.540859 |
| 33 | 1 | 0 | -6.720627 | 1.208306  | -1.850714 |
| 34 | 1 | 0 | -6.579039 | 1.566859  | -4.316177 |
| 35 | 1 | 0 | -4.360203 | 1.482353  | -5.451003 |
| 36 | 1 | 0 | -2.313678 | 1.022412  | -4.156673 |
| 37 | 6 | 0 | -4.840578 | -2.720871 | -2.321269 |
| 38 | 6 | 0 | -6.211012 | -2.751853 | -2.062657 |
| 39 | 6 | 0 | -6.686169 | -2.579082 | -0.764589 |
| 40 | 6 | 0 | -5.786357 | -2.357881 | 0.279369  |
| 41 | 6 | 0 | -4.419502 | -2.308620 | 0.023554  |
| 42 | 1 | 0 | -4.483019 | -2.850653 | -3.348523 |
| 43 | 1 | 0 | -6.912089 | -2.914370 | -2.886834 |
| 44 | 1 | 0 | -7.761352 | -2.608510 | -0.564731 |
| 45 | 1 | 0 | -6.153199 | -2.210078 | 1.299425  |
| 46 | 1 | 0 | -3.721753 | -2.096003 | 0.843704  |
| 47 | 6 | 0 | -2.065834 | -4.208591 | -3.596130 |
| 48 | 6 | 0 | -1.788361 | -4.671090 | -4.878545 |
| 49 | 6 | 0 | -1.263984 | -3.801249 | -5.837046 |
| 50 | 6 | 0 | -1.013694 | -2.470868 | -5.511117 |
| 51 | 6 | 0 | -1.292856 | -2.002750 | -4.226451 |
| 52 | 1 | 0 | -2.474533 | -4.893985 | -2.844040 |
| 53 | 1 | 0 | -1.978759 | -5.717980 | -5.133065 |
| 54 | 1 | 0 | -1.044394 | -4.168128 | -6.844227 |
| 55 | 1 | 0 | -0.593992 | -1.791100 | -6.258429 |
| 56 | 1 | 0 | -1.079752 | -0.962252 | -3.956369 |
| 57 | 6 | 0 | -1.827296 | -4.374932 | 0.305398  |
| 58 | 6 | 0 | -1.030548 | -5.195893 | 1.103391  |
| 59 | 6 | 0 | 0.356913  | -5.066632 | 1.082413  |
| 60 | 6 | 0 | 0.952786  | -4.117368 | 0.251021  |
| 61 | 6 | 0 | 0.162928  | -3.295669 | -0.546909 |
| 62 | 1 | 0 | -2.915687 | -4.491774 | 0.329337  |
| 63 | 1 | 0 | -1.502158 | -5.945342 | 1.746253  |
| 64 | 1 | 0 | 0.977140  | -5.708836 | 1.714779  |
| 65 | 1 | 0 | 2.041412  | -4.008051 | 0.227661  |
| 66 | 1 | 0 | 0.636077  | -2.547708 | -1.193801 |
| 67 | 6 | 0 | 1.654238  | 2.654121  | -2.111521 |
| 68 | 6 | 0 | 1.966951  | 4.012141  | -2.091007 |
| 69 | 6 | 0 | 2.550535  | 4.577934  | -0.959103 |
| 70 | 6 | 0 | 2.840642  | 3.788042  | 0.155021  |
| 71 | 6 | 0 | 2.548076  | 2.427898  | 0.142030  |
| 72 | 1 | 0 | 1.190141  | 2.194843  | -2.989200 |
| 73 | 1 | 0 | 1.748477  | 4.631766  | -2.965413 |
| 74 | 1 | 0 | 2.788864  | 5.645391  | -0.945074 |
| 75 | 1 | 0 | 3.309604  | 4.233608  | 1.036796  |
| 76 | 1 | 0 | 2.791398  | 1.796326  | 1.001899  |

---

37  ${}^1\text{TS}^*_G$ 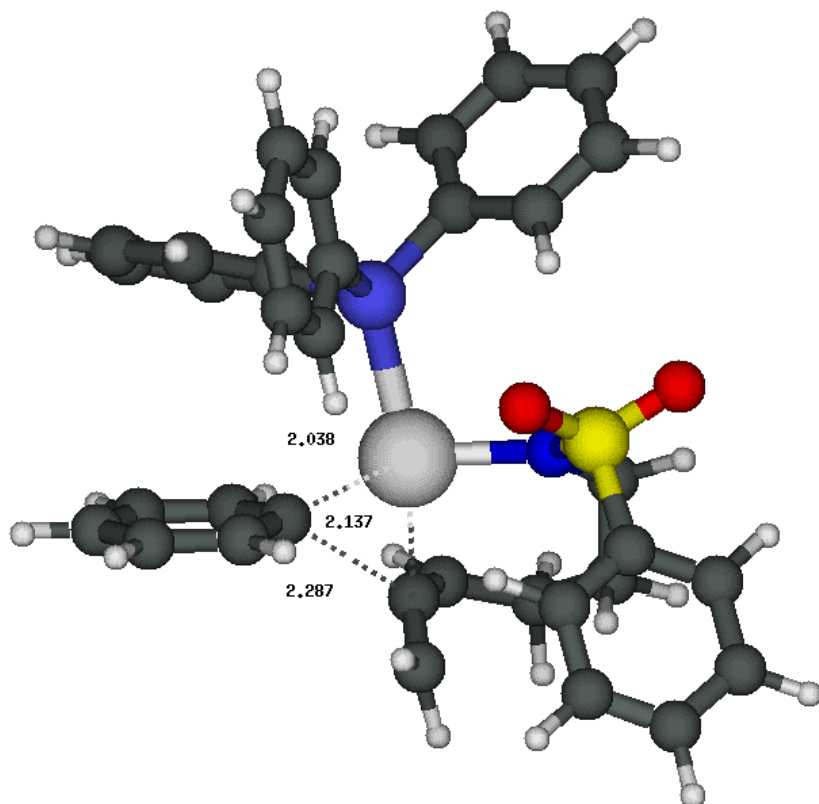


---

|    |    |   |           |           |           |
|----|----|---|-----------|-----------|-----------|
| 1  | 7  | 0 | 0.016822  | -0.004190 | -0.053744 |
| 2  | 6  | 0 | 0.009275  | -0.062768 | 1.402431  |
| 3  | 16 | 0 | 1.498529  | 0.033368  | -0.767183 |
| 4  | 6  | 0 | -0.259579 | 1.251914  | 2.139242  |
| 5  | 1  | 0 | -0.764595 | -0.796985 | 1.701716  |
| 6  | 1  | 0 | 0.971297  | -0.482843 | 1.748069  |
| 7  | 6  | 0 | -1.740928 | 1.583568  | 2.278356  |
| 8  | 1  | 0 | 0.170001  | 1.171256  | 3.152563  |
| 9  | 1  | 0 | 0.283616  | 2.076223  | 1.641978  |
| 10 | 6  | 0 | -2.492521 | 1.723668  | 0.996550  |
| 11 | 1  | 0 | -2.226986 | 0.811747  | 2.901952  |
| 12 | 1  | 0 | -1.832390 | 2.527993  | 2.859013  |
| 13 | 46 | 0 | -1.693351 | 0.503599  | -1.195531 |
| 14 | 6  | 0 | -1.941741 | 2.337972  | -0.127983 |
| 15 | 6  | 0 | 2.256027  | 1.596807  | -0.358595 |
| 16 | 8  | 0 | 2.348890  | -1.014743 | -0.183297 |
| 17 | 8  | 0 | 1.281971  | 0.015292  | -2.219098 |
| 18 | 1  | 0 | -3.521897 | 1.347234  | 0.956516  |
| 19 | 6  | 0 | -1.285609 | 3.480536  | -0.379742 |
| 20 | 1  | 0 | -0.772168 | 3.670633  | -1.328373 |
| 21 | 1  | 0 | -1.298553 | 4.299708  | 0.354130  |
| 22 | 15 | 0 | -1.893041 | -1.563819 | -2.555350 |
| 23 | 6  | 0 | -3.698149 | -1.790111 | -2.775176 |
| 24 | 6  | 0 | -1.231804 | -1.504869 | -4.260248 |
| 25 | 6  | 0 | -1.261936 | -3.164607 | -1.919811 |
| 26 | 6  | 0 | -3.044670 | 1.768311  | -2.048333 |
| 27 | 6  | 0 | -2.704517 | 2.467888  | -3.216640 |
| 28 | 6  | 0 | -3.697233 | 2.835510  | -4.121072 |
| 29 | 6  | 0 | -5.040630 | 2.562922  | -3.842711 |
| 30 | 6  | 0 | -5.386061 | 1.923022  | -2.653802 |
| 31 | 6  | 0 | -4.394187 | 1.540933  | -1.746363 |

|    |   |   |           |           |           |
|----|---|---|-----------|-----------|-----------|
| 32 | 1 | 0 | -1.656264 | 2.711218  | -3.430279 |
| 33 | 1 | 0 | -3.423136 | 3.347566  | -5.049279 |
| 34 | 1 | 0 | -5.818934 | 2.866953  | -4.549099 |
| 35 | 1 | 0 | -6.437228 | 1.720662  | -2.422124 |
| 36 | 1 | 0 | -4.683076 | 1.033609  | -0.817767 |
| 37 | 6 | 0 | -4.334668 | -1.625803 | -4.010393 |
| 38 | 6 | 0 | -5.726585 | -1.684084 | -4.096026 |
| 39 | 6 | 0 | -6.492601 | -1.912310 | -2.955653 |
| 40 | 6 | 0 | -5.865094 | -2.066113 | -1.718038 |
| 41 | 6 | 0 | -4.478998 | -1.990016 | -1.625775 |
| 42 | 1 | 0 | -3.747546 | -1.447164 | -4.917570 |
| 43 | 1 | 0 | -6.213220 | -1.552968 | -5.067230 |
| 44 | 1 | 0 | -7.583075 | -1.963277 | -3.027765 |
| 45 | 1 | 0 | -6.461091 | -2.236055 | -0.816426 |
| 46 | 1 | 0 | -3.993864 | -2.081298 | -0.645523 |
| 47 | 6 | 0 | -1.240261 | -2.641703 | -5.079303 |
| 48 | 6 | 0 | -0.771762 | -2.563568 | -6.387682 |
| 49 | 6 | 0 | -0.291087 | -1.351525 | -6.886037 |
| 50 | 6 | 0 | -0.274366 | -0.219964 | -6.073513 |
| 51 | 6 | 0 | -0.739723 | -0.296203 | -4.760909 |
| 52 | 1 | 0 | -1.624862 | -3.593390 | -4.693892 |
| 53 | 1 | 0 | -0.781845 | -3.453643 | -7.023866 |
| 54 | 1 | 0 | 0.077362  | -1.291875 | -7.914619 |
| 55 | 1 | 0 | 0.110500  | 0.728348  | -6.460146 |
| 56 | 1 | 0 | -0.706159 | 0.582661  | -4.108430 |
| 57 | 6 | 0 | -2.063492 | -4.284435 | -1.672646 |
| 58 | 6 | 0 | -1.496955 | -5.451634 | -1.160329 |
| 59 | 6 | 0 | -0.131314 | -5.511297 | -0.890622 |
| 60 | 6 | 0 | 0.673645  | -4.400116 | -1.142890 |
| 61 | 6 | 0 | 0.114012  | -3.233048 | -1.654171 |
| 62 | 1 | 0 | -3.137339 | -4.256069 | -1.883913 |
| 63 | 1 | 0 | -2.132149 | -6.322782 | -0.973287 |
| 64 | 1 | 0 | 0.308245  | -6.427340 | -0.484769 |
| 65 | 1 | 0 | 1.747707  | -4.437468 | -0.935967 |
| 66 | 1 | 0 | 0.755021  | -2.368128 | -1.856937 |
| 67 | 6 | 0 | 1.940933  | 2.720533  | -1.121462 |
| 68 | 6 | 0 | 2.455566  | 3.958405  | -0.745590 |
| 69 | 6 | 0 | 3.277325  | 4.062243  | 0.376982  |
| 70 | 6 | 0 | 3.601303  | 2.927476  | 1.120579  |
| 71 | 6 | 0 | 3.092182  | 1.683824  | 0.754390  |
| 72 | 1 | 0 | 1.298552  | 2.621702  | -2.002148 |
| 73 | 1 | 0 | 2.214715  | 4.848324  | -1.334527 |
| 74 | 1 | 0 | 3.676571  | 5.037458  | 0.670568  |
| 75 | 1 | 0 | 4.257949  | 3.010124  | 1.991347  |
| 76 | 1 | 0 | 3.340417  | 0.783556  | 1.323607  |

---

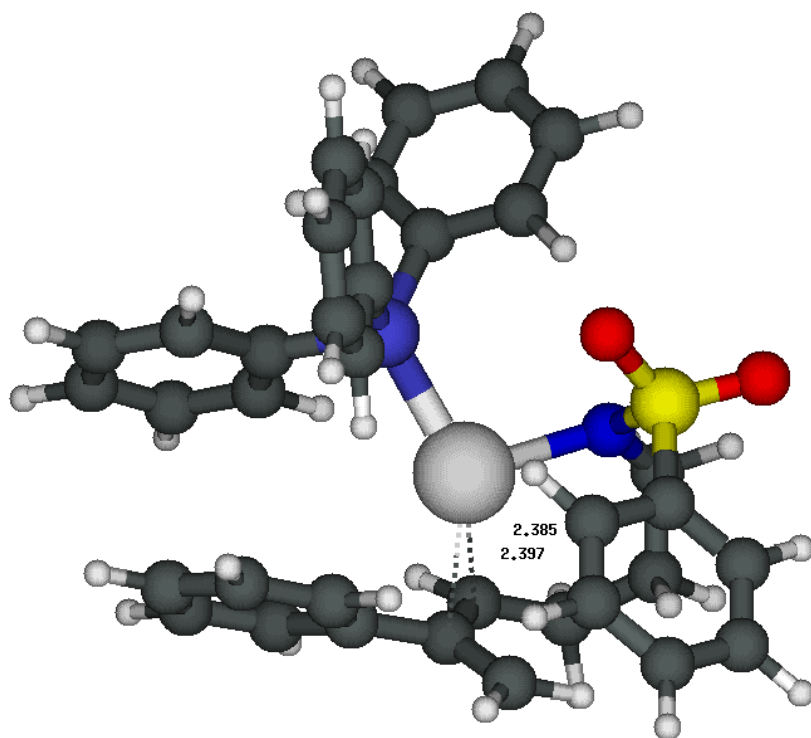


---

|    |    |   |           |           |           |
|----|----|---|-----------|-----------|-----------|
| 1  | 7  | 0 | 0.075343  | -0.020852 | -0.021577 |
| 2  | 6  | 0 | 0.041696  | -0.033291 | 1.435041  |
| 3  | 16 | 0 | 1.476645  | -0.007862 | -0.791260 |
| 4  | 6  | 0 | -0.150786 | 1.322972  | 2.110340  |
| 5  | 1  | 0 | -0.793136 | -0.696740 | 1.747052  |
| 6  | 1  | 0 | 0.963204  | -0.513920 | 1.816278  |
| 7  | 6  | 0 | -1.593349 | 1.860862  | 2.178423  |
| 8  | 1  | 0 | 0.206203  | 1.245927  | 3.153917  |
| 9  | 1  | 0 | 0.519334  | 2.050266  | 1.618212  |
| 10 | 6  | 0 | -2.372541 | 2.103808  | 0.913586  |
| 11 | 1  | 0 | -2.185108 | 1.173439  | 2.808952  |
| 12 | 1  | 0 | -1.543948 | 2.817717  | 2.741850  |
| 13 | 46 | 0 | -1.589920 | 0.989222  | -1.044367 |
| 14 | 6  | 0 | -2.053838 | 3.115271  | -0.038804 |
| 15 | 6  | 0 | 1.959552  | 1.714582  | -0.991017 |
| 16 | 8  | 0 | 2.570228  | -0.645817 | -0.030773 |
| 17 | 8  | 0 | 1.227635  | -0.491469 | -2.165233 |
| 18 | 1  | 0 | -3.370339 | 1.659100  | 0.853644  |
| 19 | 6  | 0 | -0.898350 | 3.888668  | 0.001827  |
| 20 | 1  | 0 | -0.710207 | 4.665527  | -0.745655 |
| 21 | 1  | 0 | -0.171824 | 3.786967  | 0.811962  |
| 22 | 15 | 0 | -2.439602 | -0.673303 | -2.458958 |
| 23 | 6  | 0 | -4.236309 | -0.391590 | -2.692250 |
| 24 | 6  | 0 | -1.735534 | -0.581599 | -4.130831 |
| 25 | 6  | 0 | -2.327238 | -2.424153 | -1.950547 |
| 26 | 6  | 0 | -2.999806 | 3.293497  | -1.186759 |
| 27 | 6  | 0 | -2.508602 | 3.590276  | -2.471430 |
| 28 | 6  | 0 | -3.375402 | 3.730317  | -3.554788 |
| 29 | 6  | 0 | -4.750098 | 3.599834  | -3.374874 |
| 30 | 6  | 0 | -5.252950 | 3.334630  | -2.099939 |
| 31 | 6  | 0 | -4.390124 | 3.180883  | -1.019667 |
| 32 | 1  | 0 | -1.428235 | 3.697631  | -2.624100 |
| 33 | 1  | 0 | -2.968792 | 3.943210  | -4.548429 |
| 34 | 1  | 0 | -5.431560 | 3.711977  | -4.223730 |

|    |   |   |           |           |           |
|----|---|---|-----------|-----------|-----------|
| 35 | 1 | 0 | -6.333070 | 3.246675  | -1.945389 |
| 36 | 1 | 0 | -4.799792 | 2.977926  | -0.025018 |
| 37 | 6 | 0 | -4.823696 | -0.216514 | -3.948371 |
| 38 | 6 | 0 | -6.198739 | -0.000744 | -4.052367 |
| 39 | 6 | 0 | -6.992828 | 0.031240  | -2.909421 |
| 40 | 6 | 0 | -6.409992 | -0.140718 | -1.651917 |
| 41 | 6 | 0 | -5.037915 | -0.337464 | -1.543047 |
| 42 | 1 | 0 | -4.212970 | -0.253503 | -4.857030 |
| 43 | 1 | 0 | -6.650520 | 0.135326  | -5.039420 |
| 44 | 1 | 0 | -8.071136 | 0.194070  | -2.995849 |
| 45 | 1 | 0 | -7.028531 | -0.112873 | -0.750026 |
| 46 | 1 | 0 | -4.580011 | -0.462450 | -0.553900 |
| 47 | 6 | 0 | -1.615074 | -1.711828 | -4.943520 |
| 48 | 6 | 0 | -1.132485 | -1.574994 | -6.243251 |
| 49 | 6 | 0 | -0.768988 | -0.320045 | -6.730481 |
| 50 | 6 | 0 | -0.885232 | 0.807637  | -5.918177 |
| 51 | 6 | 0 | -1.362542 | 0.677788  | -4.617273 |
| 52 | 1 | 0 | -1.905725 | -2.700049 | -4.571722 |
| 53 | 1 | 0 | -1.041055 | -2.459175 | -6.880415 |
| 54 | 1 | 0 | -0.389189 | -0.220346 | -7.751419 |
| 55 | 1 | 0 | -0.598899 | 1.792603  | -6.297633 |
| 56 | 1 | 0 | -1.453179 | 1.562149  | -3.972748 |
| 57 | 6 | 0 | -3.424610 | -3.292085 | -1.966196 |
| 58 | 6 | 0 | -3.258820 | -4.625438 | -1.594806 |
| 59 | 6 | 0 | -2.004508 | -5.096250 | -1.210128 |
| 60 | 6 | 0 | -0.908855 | -4.232760 | -1.200812 |
| 61 | 6 | 0 | -1.065441 | -2.899282 | -1.566311 |
| 62 | 1 | 0 | -4.413326 | -2.938948 | -2.275606 |
| 63 | 1 | 0 | -4.119267 | -5.300801 | -1.610236 |
| 64 | 1 | 0 | -1.879108 | -6.142937 | -0.917739 |
| 65 | 1 | 0 | 0.078046  | -4.599908 | -0.904022 |
| 66 | 1 | 0 | -0.204384 | -2.215586 | -1.570135 |
| 67 | 6 | 0 | 1.462982  | 2.452123  | -2.067488 |
| 68 | 6 | 0 | 1.792558  | 3.802002  | -2.182233 |
| 69 | 6 | 0 | 2.611243  | 4.407288  | -1.228307 |
| 70 | 6 | 0 | 3.107545  | 3.661250  | -0.158964 |
| 71 | 6 | 0 | 2.784009  | 2.310913  | -0.037197 |
| 72 | 1 | 0 | 0.833883  | 1.962855  | -2.820054 |
| 73 | 1 | 0 | 1.412827  | 4.383797  | -3.027966 |
| 74 | 1 | 0 | 2.869997  | 5.466106  | -1.322755 |
| 75 | 1 | 0 | 3.758455  | 4.132742  | 0.583552  |
| 76 | 1 | 0 | 3.177904  | 1.710949  | 0.788850  |

---

39 Int.  $^3E^*$ 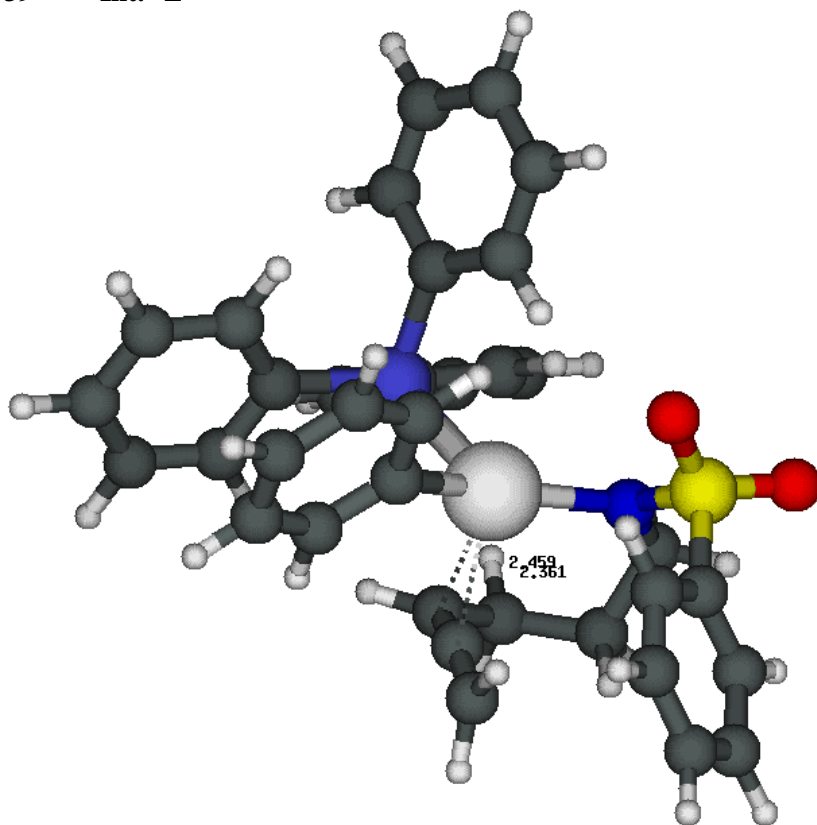

|    |    |   |           |           |           |
|----|----|---|-----------|-----------|-----------|
| 1  | 7  | 0 | 0.405704  | -0.165102 | -0.323452 |
| 2  | 6  | 0 | 0.652598  | -0.314560 | 1.101254  |
| 3  | 16 | 0 | 1.637550  | 0.237789  | -1.285450 |
| 4  | 6  | 0 | -0.238917 | 0.536441  | 1.993197  |
| 5  | 1  | 0 | 0.491644  | -1.377220 | 1.383986  |
| 6  | 1  | 0 | 1.711478  | -0.106396 | 1.339804  |
| 7  | 6  | 0 | -1.718757 | 0.199858  | 1.912095  |
| 8  | 1  | 0 | 0.093087  | 0.376944  | 3.033435  |
| 9  | 1  | 0 | -0.076025 | 1.609828  | 1.781336  |
| 10 | 6  | 0 | -2.486370 | 0.776328  | 0.758444  |
| 11 | 1  | 0 | -1.866197 | -0.896594 | 1.936624  |
| 12 | 1  | 0 | -2.233795 | 0.572805  | 2.819796  |
| 13 | 46 | 0 | -1.466040 | 0.130255  | -1.348183 |
| 14 | 6  | 0 | -2.103861 | 1.855962  | 0.046122  |
| 15 | 6  | 0 | 1.690371  | 2.032231  | -1.343799 |
| 16 | 8  | 0 | 2.930566  | -0.196225 | -0.734559 |
| 17 | 8  | 0 | 1.292999  | -0.189285 | -2.655125 |
| 18 | 1  | 0 | -3.522296 | 0.425428  | 0.635759  |
| 19 | 6  | 0 | -1.833076 | 3.088917  | -0.308151 |
| 20 | 1  | 0 | -2.116730 | 3.916730  | 0.357612  |
| 21 | 1  | 0 | -1.344259 | 3.348576  | -1.254919 |
| 22 | 15 | 0 | -3.073027 | -1.680566 | -1.657386 |
| 23 | 6  | 0 | -4.756299 | -1.247052 | -2.193986 |
| 24 | 6  | 0 | -2.401084 | -2.834445 | -2.913123 |
| 25 | 6  | 0 | -3.220787 | -2.777891 | -0.197050 |
| 26 | 6  | 0 | -2.453221 | 1.020279  | -3.023659 |
| 27 | 6  | 0 | -3.629266 | 1.776089  | -2.947637 |
| 28 | 6  | 0 | -4.208286 | 2.325500  | -4.094505 |
| 29 | 6  | 0 | -3.623270 | 2.118943  | -5.344724 |
| 30 | 6  | 0 | -2.452190 | 1.368044  | -5.436099 |
| 31 | 6  | 0 | -1.873337 | 0.822323  | -4.284418 |

|    |   |   |           |           |           |
|----|---|---|-----------|-----------|-----------|
| 32 | 1 | 0 | -4.119652 | 1.944305  | -1.979383 |
| 33 | 1 | 0 | -5.129378 | 2.913815  | -4.010750 |
| 34 | 1 | 0 | -4.078913 | 2.543699  | -6.245005 |
| 35 | 1 | 0 | -1.980728 | 1.202754  | -6.411406 |
| 36 | 1 | 0 | -0.950111 | 0.235302  | -4.383426 |
| 37 | 6 | 0 | -5.129554 | -1.319062 | -3.542459 |
| 38 | 6 | 0 | -6.369671 | -0.835234 | -3.954185 |
| 39 | 6 | 0 | -7.245955 | -0.270154 | -3.029533 |
| 40 | 6 | 0 | -6.877275 | -0.185781 | -1.687070 |
| 41 | 6 | 0 | -5.637705 | -0.663929 | -1.271015 |
| 42 | 1 | 0 | -4.445710 | -1.745171 | -4.284122 |
| 43 | 1 | 0 | -6.649701 | -0.898013 | -5.009943 |
| 44 | 1 | 0 | -8.218847 | 0.108997  | -3.355868 |
| 45 | 1 | 0 | -7.558361 | 0.260242  | -0.956445 |
| 46 | 1 | 0 | -5.355143 | -0.576401 | -0.215915 |
| 47 | 6 | 0 | -3.136554 | -3.965127 | -3.296897 |
| 48 | 6 | 0 | -2.597090 | -4.875249 | -4.200024 |
| 49 | 6 | 0 | -1.316607 | -4.670783 | -4.717300 |
| 50 | 6 | 0 | -0.575898 | -3.558981 | -4.325333 |
| 51 | 6 | 0 | -1.113243 | -2.639084 | -3.423115 |
| 52 | 1 | 0 | -4.137577 | -4.136659 | -2.883950 |
| 53 | 1 | 0 | -3.176879 | -5.753696 | -4.498463 |
| 54 | 1 | 0 | -0.893077 | -5.388835 | -5.425905 |
| 55 | 1 | 0 | 0.432398  | -3.402659 | -4.720019 |
| 56 | 1 | 0 | -0.511667 | -1.775098 | -3.108394 |
| 57 | 6 | 0 | -4.422265 | -3.298887 | 0.295113  |
| 58 | 6 | 0 | -4.411867 | -4.145129 | 1.403814  |
| 59 | 6 | 0 | -3.209586 | -4.480899 | 2.023092  |
| 60 | 6 | 0 | -2.007395 | -3.972812 | 1.529316  |
| 61 | 6 | 0 | -2.012965 | -3.122400 | 0.428028  |
| 62 | 1 | 0 | -5.373386 | -3.057674 | -0.190037 |
| 63 | 1 | 0 | -5.355463 | -4.549437 | 1.782208  |
| 64 | 1 | 0 | -3.208169 | -5.144166 | 2.893103  |
| 65 | 1 | 0 | -1.059093 | -4.235844 | 2.007796  |
| 66 | 1 | 0 | -1.067405 | -2.717073 | 0.043788  |
| 67 | 6 | 0 | 1.105294  | 2.709541  | -2.412903 |
| 68 | 6 | 0 | 1.090329  | 4.103820  | -2.411257 |
| 69 | 6 | 0 | 1.645801  | 4.809485  | -1.344941 |
| 70 | 6 | 0 | 2.232752  | 4.122384  | -0.281491 |
| 71 | 6 | 0 | 2.264625  | 2.729871  | -0.279874 |
| 72 | 1 | 0 | 0.666403  | 2.143928  | -3.240582 |
| 73 | 1 | 0 | 0.638157  | 4.641299  | -3.250204 |
| 74 | 1 | 0 | 1.628681  | 5.903366  | -1.344784 |
| 75 | 1 | 0 | 2.679459  | 4.675928  | 0.549712  |
| 76 | 1 | 0 | 2.741916  | 2.186154  | 0.541394  |

---

40  ${}^3\text{TS}^*_G$ 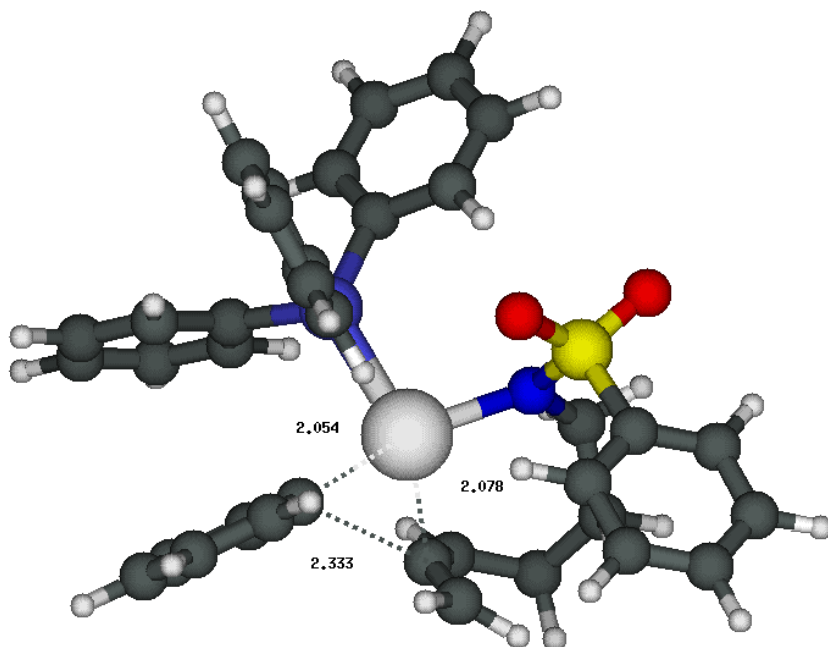


---

|    |    |   |           |           |           |
|----|----|---|-----------|-----------|-----------|
| 1  | 7  | 0 | 0.014077  | -0.013686 | 0.053886  |
| 2  | 6  | 0 | 0.020489  | 0.082261  | 1.512941  |
| 3  | 16 | 0 | 1.444519  | -0.038116 | -0.671088 |
| 4  | 6  | 0 | -0.120133 | 1.492943  | 2.103817  |
| 5  | 1  | 0 | -0.801668 | -0.552023 | 1.901457  |
| 6  | 1  | 0 | 0.946710  | -0.378865 | 1.904791  |
| 7  | 6  | 0 | -1.561142 | 1.979602  | 2.322584  |
| 8  | 1  | 0 | 0.389983  | 1.523386  | 3.082869  |
| 9  | 1  | 0 | 0.423176  | 2.210737  | 1.462672  |
| 10 | 6  | 0 | -2.430148 | 1.790512  | 1.118689  |
| 11 | 1  | 0 | -2.010774 | 1.433670  | 3.168950  |
| 12 | 1  | 0 | -1.536067 | 3.047913  | 2.611422  |
| 13 | 46 | 0 | -1.730839 | 0.588651  | -1.070238 |
| 14 | 6  | 0 | -2.135545 | 2.382045  | -0.101587 |
| 15 | 6  | 0 | 2.174654  | 1.596143  | -0.510316 |
| 16 | 8  | 0 | 2.391833  | -0.957865 | -0.014623 |
| 17 | 8  | 0 | 1.218715  | -0.227416 | -2.117604 |
| 18 | 1  | 0 | -3.231703 | 1.040111  | 1.165425  |
| 19 | 6  | 0 | -1.392203 | 3.459768  | -0.515760 |
| 20 | 1  | 0 | -1.398327 | 3.805007  | -1.556162 |
| 21 | 1  | 0 | -0.782914 | 4.026350  | 0.205558  |
| 22 | 15 | 0 | -2.177906 | -1.391737 | -2.330056 |
| 23 | 6  | 0 | -3.983503 | -1.644984 | -2.493796 |
| 24 | 6  | 0 | -1.537504 | -1.321187 | -4.042646 |
| 25 | 6  | 0 | -1.536794 | -3.008204 | -1.722867 |
| 26 | 6  | 0 | -3.377486 | 1.515085  | -1.876248 |
| 27 | 6  | 0 | -3.229318 | 2.243664  | -3.068089 |
| 28 | 6  | 0 | -4.342034 | 2.754931  | -3.737179 |
| 29 | 6  | 0 | -5.623268 | 2.568871  | -3.216665 |
| 30 | 6  | 0 | -5.781934 | 1.872893  | -2.017370 |
| 31 | 6  | 0 | -4.670381 | 1.351832  | -1.355609 |
| 32 | 1  | 0 | -2.230505 | 2.412136  | -3.489664 |
| 33 | 1  | 0 | -4.204724 | 3.305825  | -4.673592 |
| 34 | 1  | 0 | -6.495412 | 2.972387  | -3.740287 |
| 35 | 1  | 0 | -6.781590 | 1.729697  | -1.592812 |
| 36 | 1  | 0 | -4.819266 | 0.804595  | -0.416865 |



|    |   |   |           |           |           |
|----|---|---|-----------|-----------|-----------|
| 37 | 6 | 0 | -4.658848 | -1.498869 | -3.709236 |
| 38 | 6 | 0 | -6.048917 | -1.612591 | -3.757294 |
| 39 | 6 | 0 | -6.772605 | -1.881661 | -2.598256 |
| 40 | 6 | 0 | -6.105738 | -2.018602 | -1.380121 |
| 41 | 6 | 0 | -4.721974 | -1.884316 | -1.325563 |
| 42 | 1 | 0 | -4.104971 | -1.287111 | -4.629760 |
| 43 | 1 | 0 | -6.567109 | -1.493237 | -4.713489 |
| 44 | 1 | 0 | -7.861514 | -1.978655 | -2.641197 |
| 45 | 1 | 0 | -6.668771 | -2.218741 | -0.463679 |
| 46 | 1 | 0 | -4.207127 | -1.958360 | -0.359221 |
| 47 | 6 | 0 | -1.655680 | -2.425574 | -4.897536 |
| 48 | 6 | 0 | -1.171797 | -2.354207 | -6.200480 |
| 49 | 6 | 0 | -0.562120 | -1.183954 | -6.655779 |
| 50 | 6 | 0 | -0.430562 | -0.088486 | -5.805519 |
| 51 | 6 | 0 | -0.913377 | -0.157375 | -4.499107 |
| 52 | 1 | 0 | -2.134301 | -3.346364 | -4.543830 |
| 53 | 1 | 0 | -1.268751 | -3.217715 | -6.865148 |
| 54 | 1 | 0 | -0.180809 | -1.130239 | -7.679961 |
| 55 | 1 | 0 | 0.058679  | 0.824554  | -6.157287 |
| 56 | 1 | 0 | -0.786233 | 0.687418  | -3.813372 |
| 57 | 6 | 0 | -2.353608 | -4.110436 | -1.444306 |
| 58 | 6 | 0 | -1.791470 | -5.304570 | -0.992476 |
| 59 | 6 | 0 | -0.414319 | -5.411080 | -0.814354 |
| 60 | 6 | 0 | 0.405106  | -4.319841 | -1.102882 |
| 61 | 6 | 0 | -0.149050 | -3.126470 | -1.556095 |
| 62 | 1 | 0 | -3.436784 | -4.053323 | -1.585459 |
| 63 | 1 | 0 | -2.441329 | -6.159095 | -0.781006 |
| 64 | 1 | 0 | 0.022198  | -6.347681 | -0.454719 |
| 65 | 1 | 0 | 1.489244  | -4.392820 | -0.971345 |
| 66 | 1 | 0 | 0.501372  | -2.278922 | -1.795673 |
| 67 | 6 | 0 | 1.720002  | 2.625967  | -1.335352 |
| 68 | 6 | 0 | 2.203386  | 3.918021  | -1.142926 |
| 69 | 6 | 0 | 3.131557  | 4.175353  | -0.132842 |
| 70 | 6 | 0 | 3.590124  | 3.137312  | 0.677892  |
| 71 | 6 | 0 | 3.114118  | 1.840705  | 0.489886  |
| 72 | 1 | 0 | 0.989340  | 2.413377  | -2.123618 |
| 73 | 1 | 0 | 1.852069  | 4.731178  | -1.785699 |
| 74 | 1 | 0 | 3.505989  | 5.192265  | 0.017685  |
| 75 | 1 | 0 | 4.326720  | 3.337639  | 1.461706  |
| 76 | 1 | 0 | 3.464755  | 1.013591  | 1.114330  |

---

41 Int.  $^3G^*$ 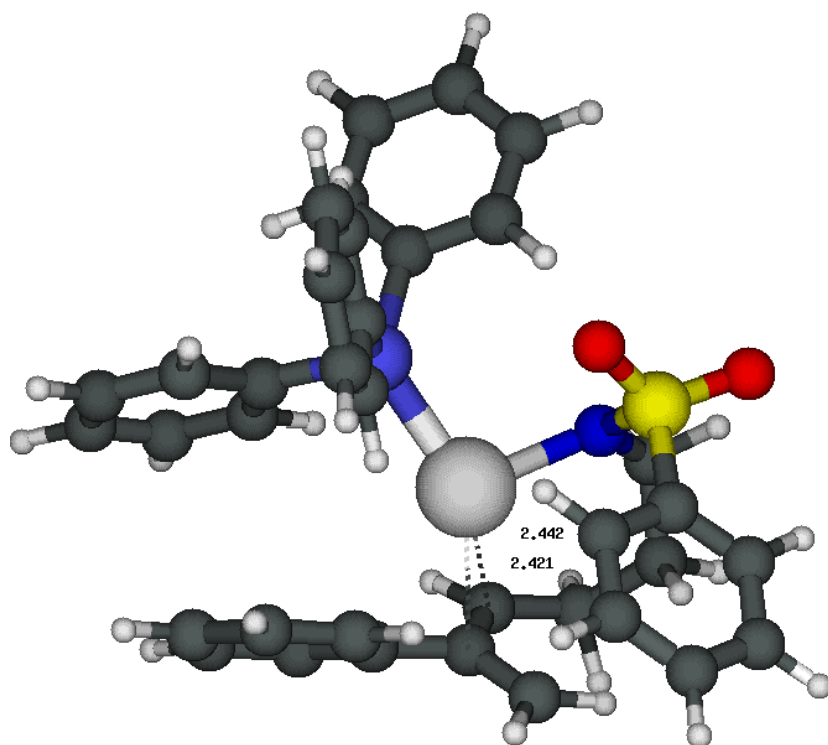


---

|    |    |   |           |           |           |
|----|----|---|-----------|-----------|-----------|
| 1  | 7  | 0 | 1.677589  | -0.286160 | 1.776557  |
| 2  | 6  | 0 | 1.677028  | -0.240734 | 3.230002  |
| 3  | 16 | 0 | 3.065674  | -0.085714 | 0.994791  |
| 4  | 6  | 0 | 1.340505  | 1.103288  | 3.868357  |
| 5  | 1  | 0 | 0.953448  | -1.000574 | 3.591223  |
| 6  | 1  | 0 | 2.665052  | -0.573083 | 3.598338  |
| 7  | 6  | 0 | -0.151296 | 1.433616  | 3.984165  |
| 8  | 1  | 0 | 1.744164  | 1.106292  | 4.896563  |
| 9  | 1  | 0 | 1.889499  | 1.899271  | 3.334019  |
| 10 | 6  | 0 | -0.983626 | 1.500591  | 2.740096  |
| 11 | 1  | 0 | -0.607517 | 0.683498  | 4.653331  |
| 12 | 1  | 0 | -0.242963 | 2.402515  | 4.516023  |
| 13 | 46 | 0 | -0.083837 | 0.417357  | 0.744477  |
| 14 | 6  | 0 | -0.864027 | 2.484438  | 1.734546  |
| 15 | 6  | 0 | 3.301601  | 1.672934  | 0.689120  |
| 16 | 8  | 0 | 4.215559  | -0.505434 | 1.816182  |
| 17 | 8  | 0 | 2.937970  | -0.686117 | -0.345702 |
| 18 | 1  | 0 | -1.873545 | 0.859606  | 2.710829  |
| 19 | 6  | 0 | 0.124001  | 3.477203  | 1.762104  |
| 20 | 1  | 0 | 0.144229  | 4.271812  | 1.009924  |
| 21 | 1  | 0 | 0.840644  | 3.545279  | 2.585296  |
| 22 | 15 | 0 | -0.591677 | -1.396465 | -0.665932 |
| 23 | 6  | 0 | -2.407919 | -1.412198 | -0.924387 |
| 24 | 6  | 0 | 0.095518  | -1.296154 | -2.358454 |
| 25 | 6  | 0 | -0.208932 | -3.104415 | -0.121827 |
| 26 | 6  | 0 | -1.839117 | 2.467759  | 0.599432  |
| 27 | 6  | 0 | -1.419702 | 2.794978  | -0.704385 |
| 28 | 6  | 0 | -2.309847 | 2.745330  | -1.775056 |
| 29 | 6  | 0 | -3.640520 | 2.387980  | -1.565054 |
| 30 | 6  | 0 | -4.076260 | 2.087401  | -0.273787 |
| 31 | 6  | 0 | -3.186908 | 2.122899  | 0.795489  |
| 32 | 1  | 0 | -0.375735 | 3.077278  | -0.880856 |
| 33 | 1  | 0 | -1.956930 | 2.987251  | -2.782417 |

|    |   |   |           |           |           |
|----|---|---|-----------|-----------|-----------|
| 34 | 1 | 0 | -4.341231 | 2.351665  | -2.404826 |
| 35 | 1 | 0 | -5.124326 | 1.826528  | -0.096469 |
| 36 | 1 | 0 | -3.546426 | 1.892806  | 1.803664  |
| 37 | 6 | 0 | -3.006092 | -1.371093 | -2.188586 |
| 38 | 6 | 0 | -4.397078 | -1.378730 | -2.304948 |
| 39 | 6 | 0 | -5.197606 | -1.437079 | -1.166806 |
| 40 | 6 | 0 | -4.606518 | -1.475140 | 0.097680  |
| 41 | 6 | 0 | -3.221134 | -1.449913 | 0.218712  |
| 42 | 1 | 0 | -2.389215 | -1.338308 | -3.093055 |
| 43 | 1 | 0 | -4.855796 | -1.345944 | -3.297801 |
| 44 | 1 | 0 | -6.287380 | -1.449718 | -1.263037 |
| 45 | 1 | 0 | -5.230623 | -1.516965 | 0.995417  |
| 46 | 1 | 0 | -2.758848 | -1.471988 | 1.214208  |
| 47 | 6 | 0 | 0.375545  | -2.431452 | -3.125916 |
| 48 | 6 | 0 | 0.848408  | -2.291891 | -4.430268 |
| 49 | 6 | 0 | 1.039150  | -1.023404 | -4.975760 |
| 50 | 6 | 0 | 0.760698  | 0.111633  | -4.214164 |
| 51 | 6 | 0 | 0.296749  | -0.024550 | -2.908403 |
| 52 | 1 | 0 | 0.221003  | -3.433044 | -2.709464 |
| 53 | 1 | 0 | 1.067961  | -3.183523 | -5.025156 |
| 54 | 1 | 0 | 1.410783  | -0.918304 | -5.999421 |
| 55 | 1 | 0 | 0.912832  | 1.109120  | -4.637109 |
| 56 | 1 | 0 | 0.087532  | 0.865203  | -2.301470 |
| 57 | 6 | 0 | -1.155654 | -4.135706 | -0.148253 |
| 58 | 6 | 0 | -0.800170 | -5.422445 | 0.254439  |
| 59 | 6 | 0 | 0.499072  | -5.690042 | 0.680951  |
| 60 | 6 | 0 | 1.446910  | -4.667056 | 0.701668  |
| 61 | 6 | 0 | 1.098626  | -3.378106 | 0.305773  |
| 62 | 1 | 0 | -2.177935 | -3.943757 | -0.490512 |
| 63 | 1 | 0 | -1.546583 | -6.222164 | 0.229623  |
| 64 | 1 | 0 | 0.774856  | -6.700736 | 0.996699  |
| 65 | 1 | 0 | 2.469671  | -4.873772 | 1.031303  |
| 66 | 1 | 0 | 1.842808  | -2.573725 | 0.311914  |
| 67 | 6 | 0 | 2.746835  | 2.258700  | -0.449222 |
| 68 | 6 | 0 | 2.875716  | 3.632958  | -0.643501 |
| 69 | 6 | 0 | 3.550655  | 4.413711  | 0.295367  |
| 70 | 6 | 0 | 4.107308  | 3.818786  | 1.427644  |
| 71 | 6 | 0 | 3.987382  | 2.444379  | 1.626890  |
| 72 | 1 | 0 | 2.227835  | 1.634955  | -1.184689 |
| 73 | 1 | 0 | 2.449231  | 4.097227  | -1.538262 |
| 74 | 1 | 0 | 3.651001  | 5.491916  | 0.139261  |
| 75 | 1 | 0 | 4.647014  | 4.428341  | 2.158656  |
| 76 | 1 | 0 | 4.431475  | 1.962959  | 2.503701  |

---
